# Supplementary material for: A transitional snake from the Late Cretaceous period of North America
Source: Springer Nature journal article supplement (doi:10.1038/nature11227), 2012-07-24
Supplement: 41586_2012_BFnature11227_MOESM231_ESM.pdf [file 41586_2012_BFnature11227_MOESM231_ESM.pdf]

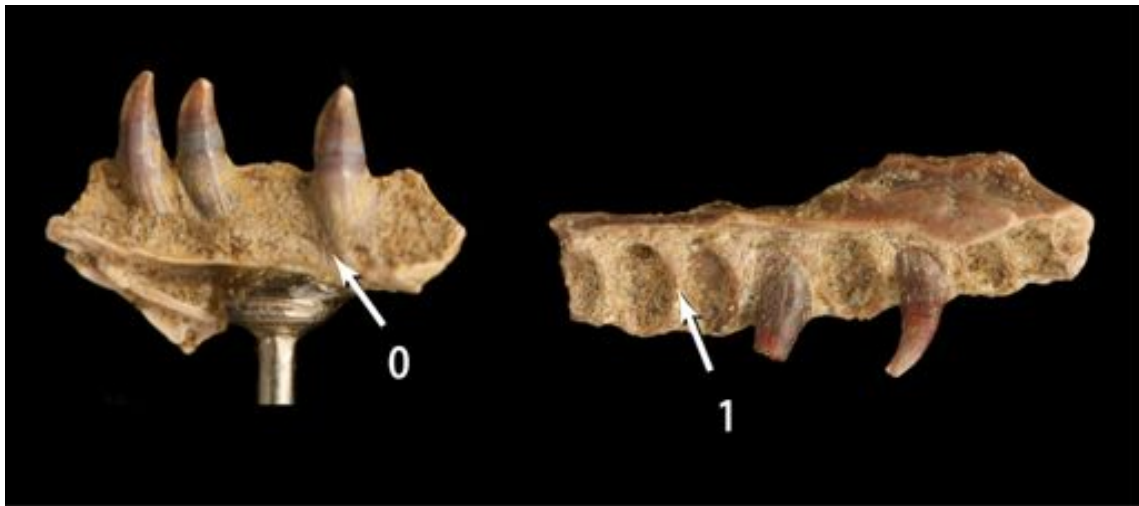

**Character 155, interdental ridges.** Absence of interdental ridge (0) shown in *Parasaniwa wyomingensis* (Platynota). Interdental ridges (1) shown in *Coniophis precedens*.

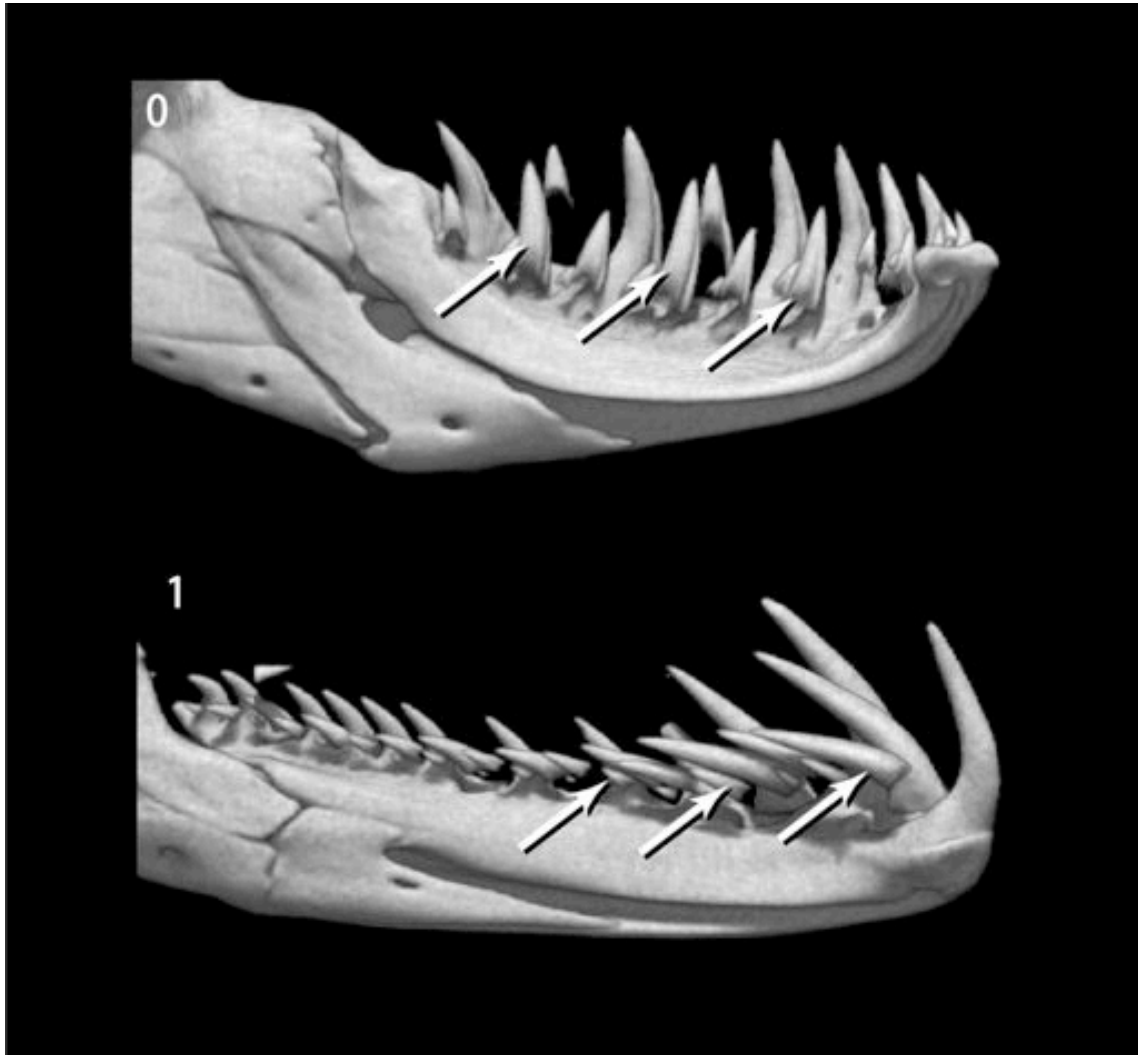

**Character 156, horizontally oriented replacement teeth.** Replacement teeth develop upright in jaw (0) shown in *Heloderma horridum* (Helodermatidae), replacement teeth lie horizontal in jaw (1) shown in *Epicrates striatus* (Boinae).

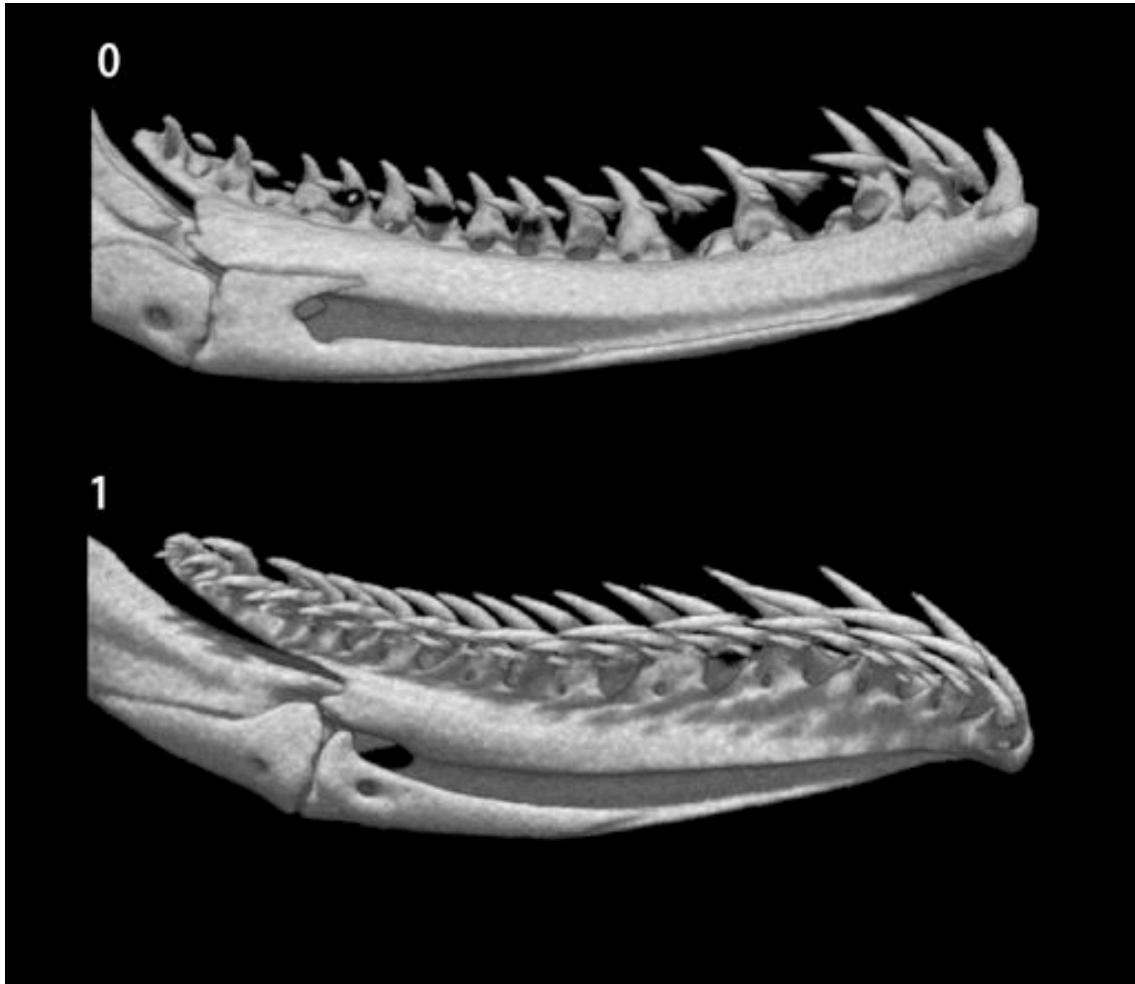

**Character 157, multiple replacement teeth.** Single replacement tooth per tooth position (0) shown in *Loxocemus bicolor* (Loxocemidae), multiple replacement teeth (1) shown in *Tropidophis haetianus* (Tropidophiidae).

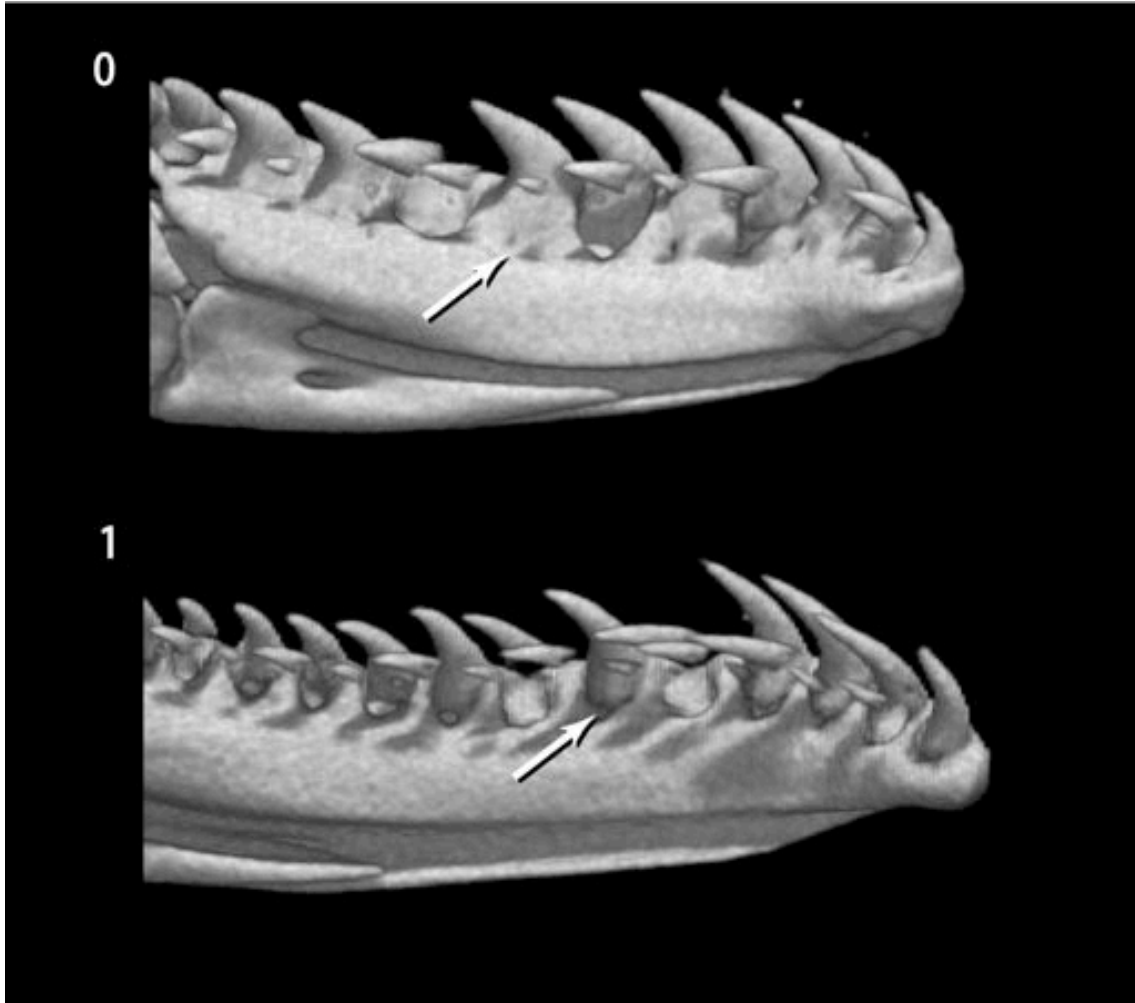

**Character 158 teeth not ankylosed to jaws.** Ankylosis of teeth to tooth-bearing elements (0) shown in *Cylindrophis ruffus* (Uropeltidae), teeth held loosely in sockets by ligaments (1) shown in *Loxocemus bicolor* (Loxocemidae).

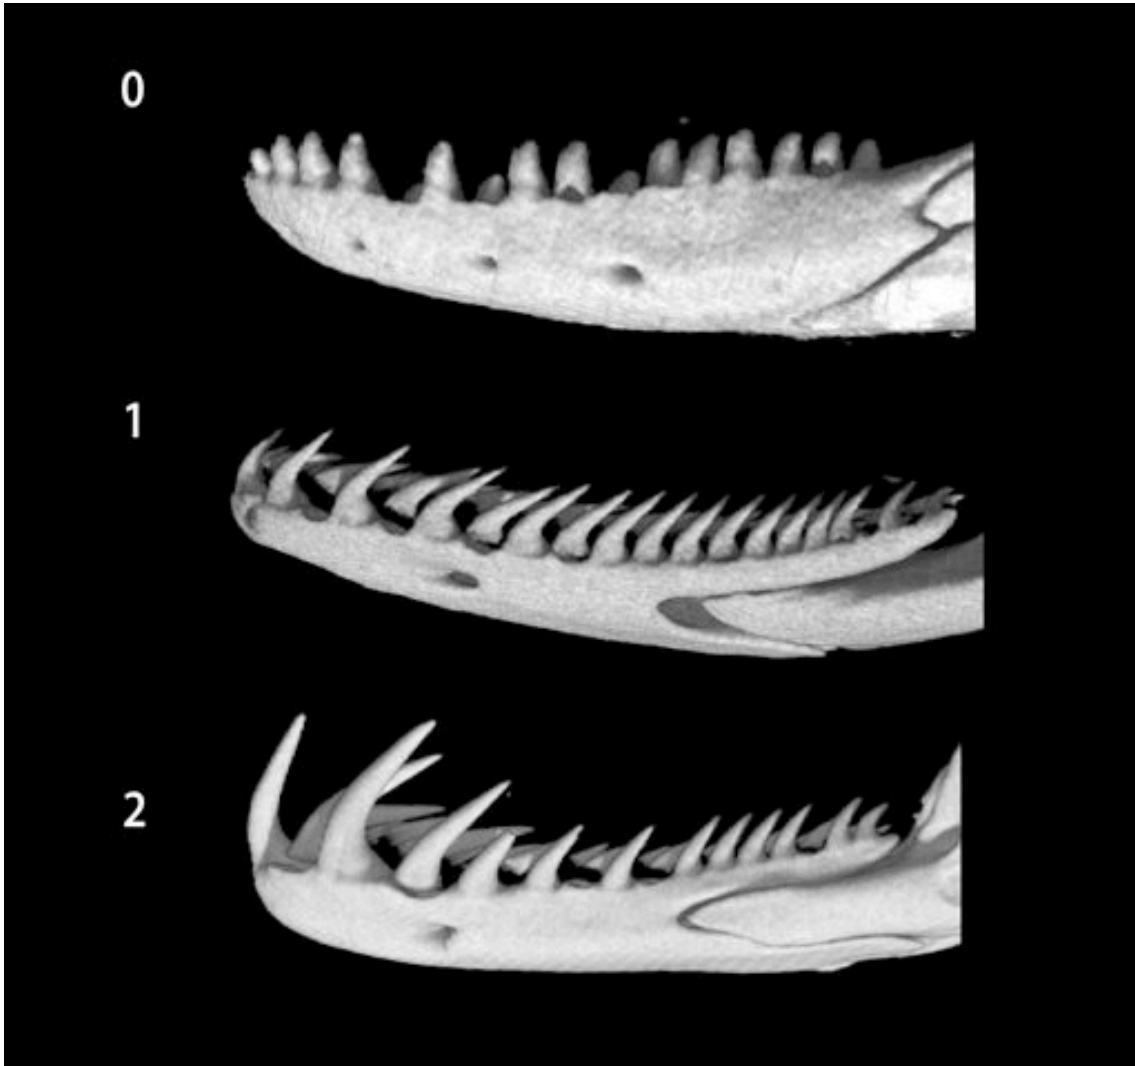

**Character 159 enlarged anterior teeth.** Anterior teeth subequal to or shorter than posterior teeth (0) shown in *Celestus enneagrammus* (Anguinae), anterior teeth enlarged relative to posterior teeth (1) shown in *Loxocemus bicolor* (Loxocemidae); hypertrophied, fang-like anterior teeth (2) shown in *Epicrates striatus* (Boinae).

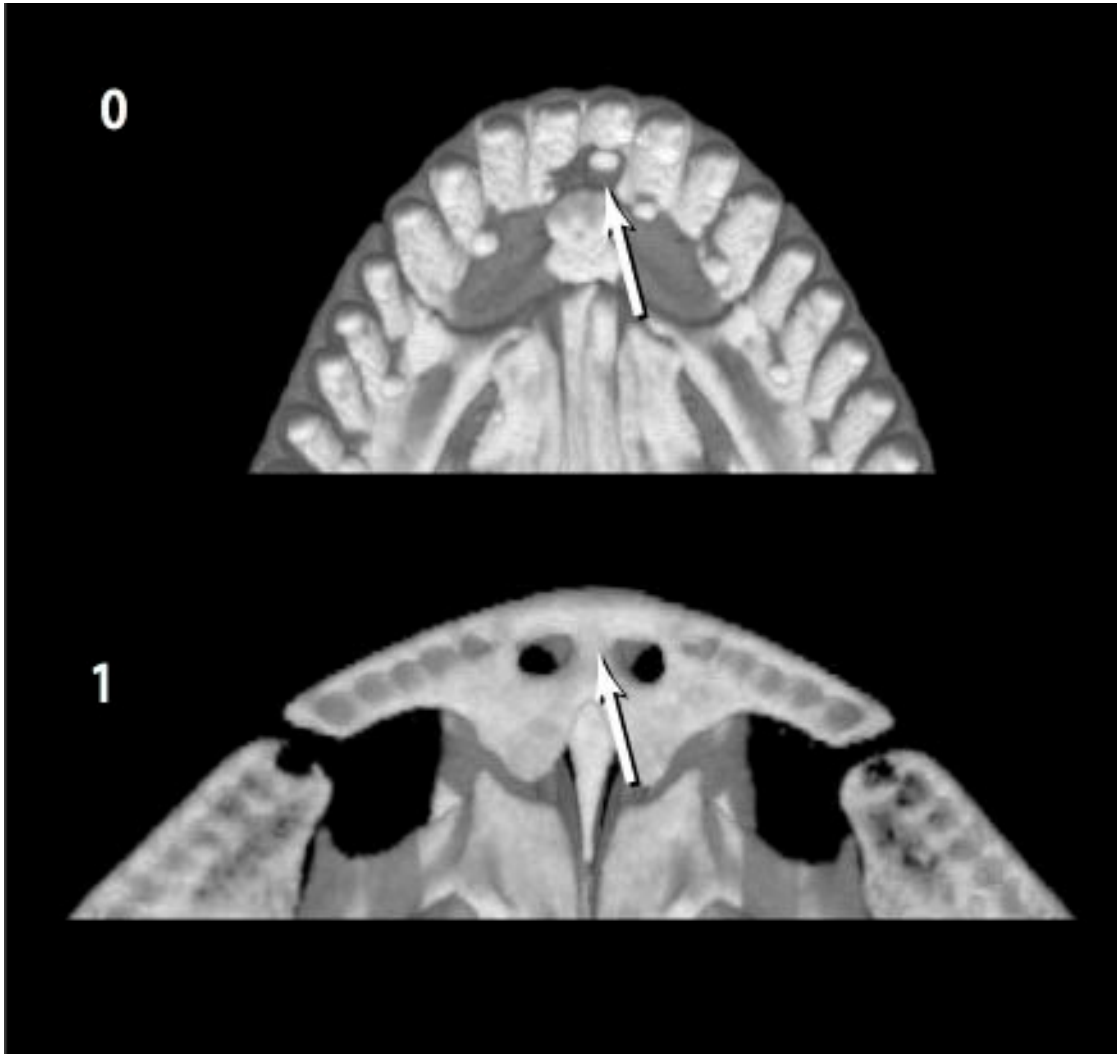

**Character 160 premaxilla diastema.** Medial teeth present (0) shown in *Xenosaurus grandis* (Xenosauridae); medial teeth absent (1) shown in *Xenopeltis unicolor*.

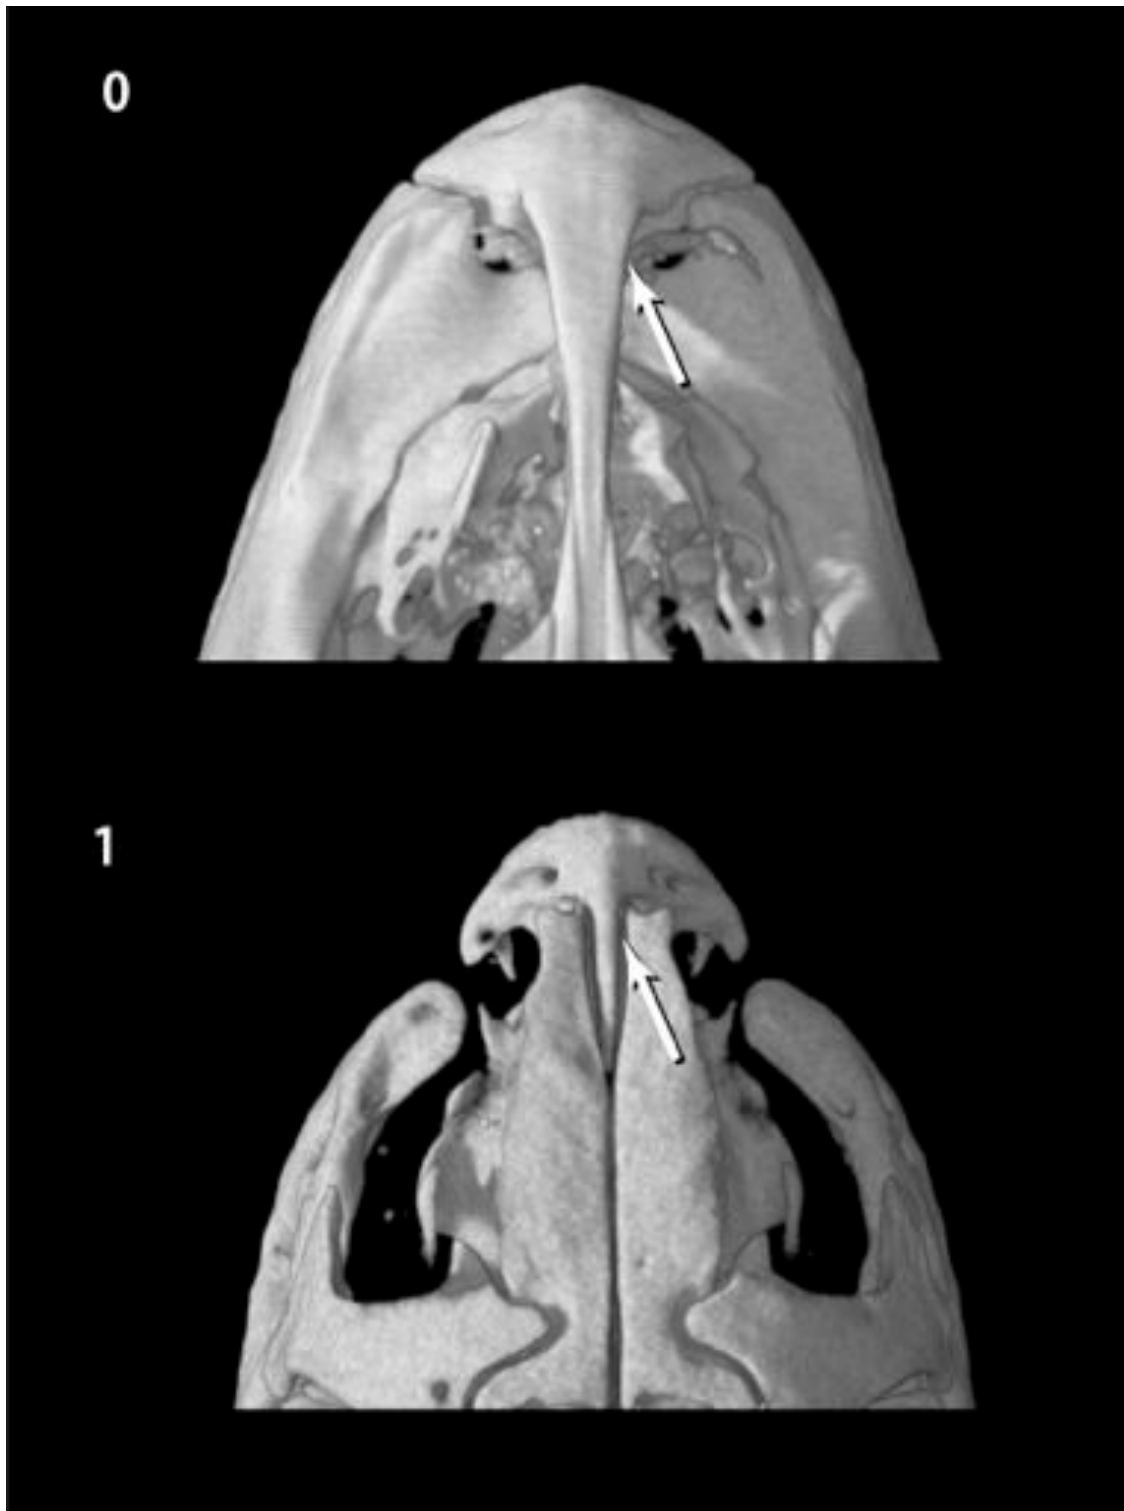

**Character 161 narrow nasal process.** Mediolaterally broad nasal process (0) shown in *Varanus exanthematicus* (Varanidae); narrow nasal process (1) shown in *Loxocemus bicolor* (Loxocemidae).

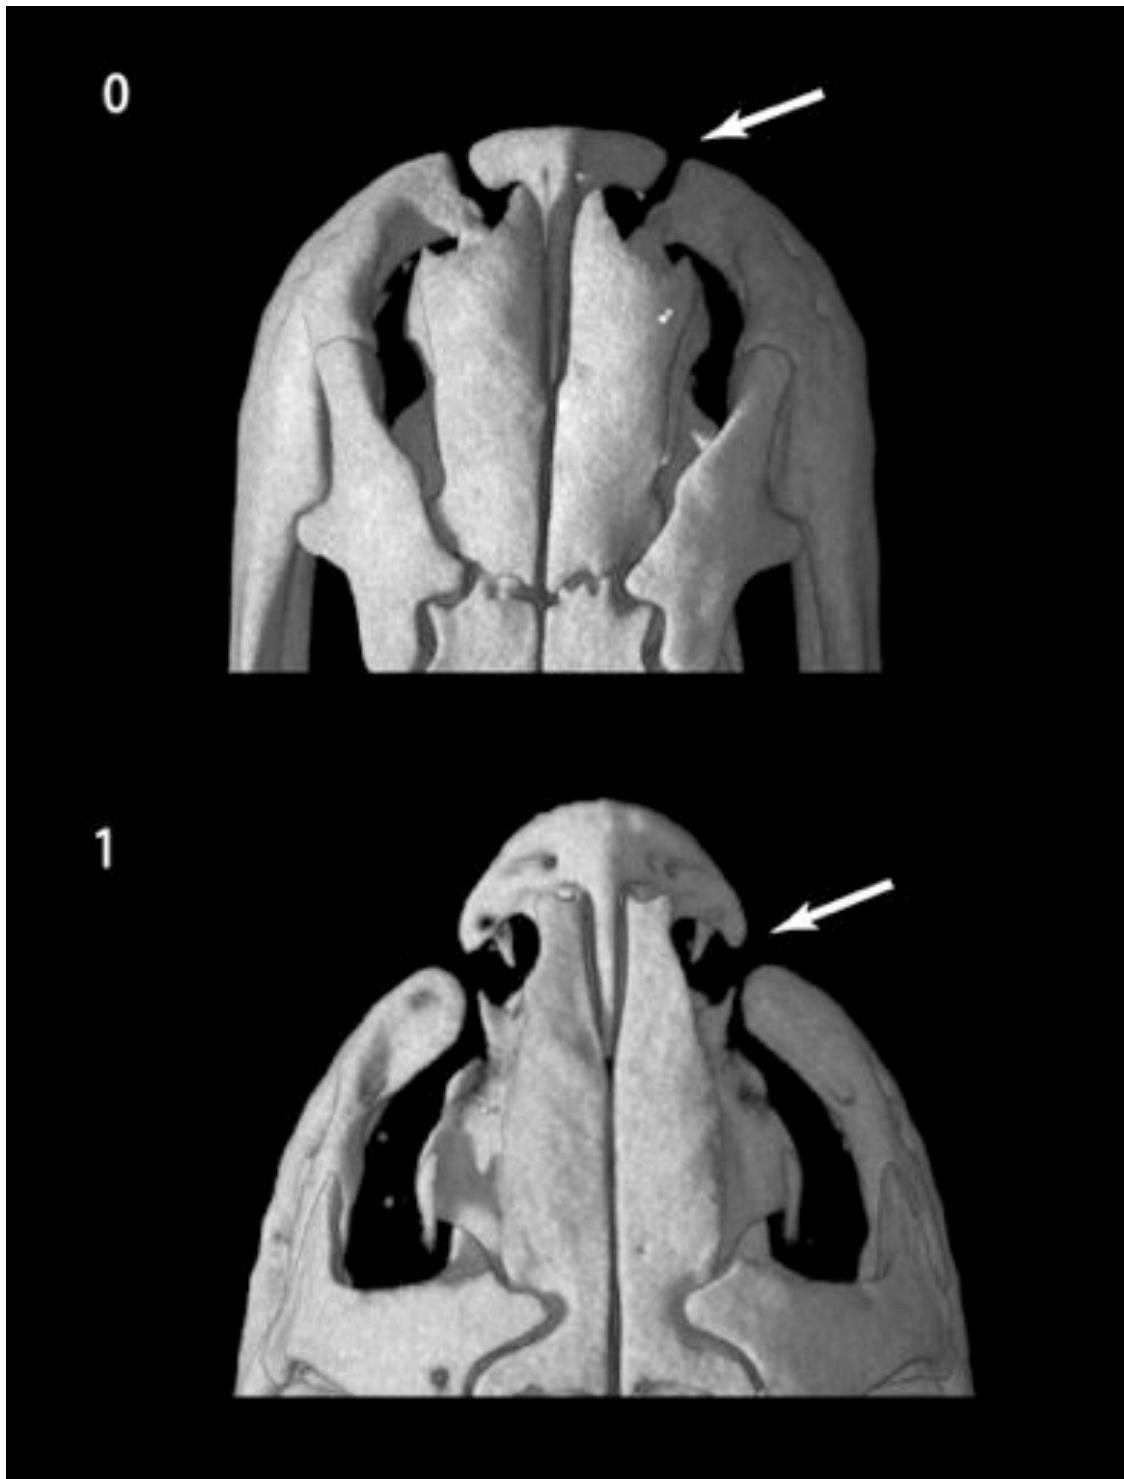

**Character 162 position of premaxilla.** Premaxilla medial to maxillae (0) shown in *Anilius scytale* (Aniliidae); premaxilla anteriorly displaced (1) shown in *Loxocemus bicolor* (Loxocemidae).



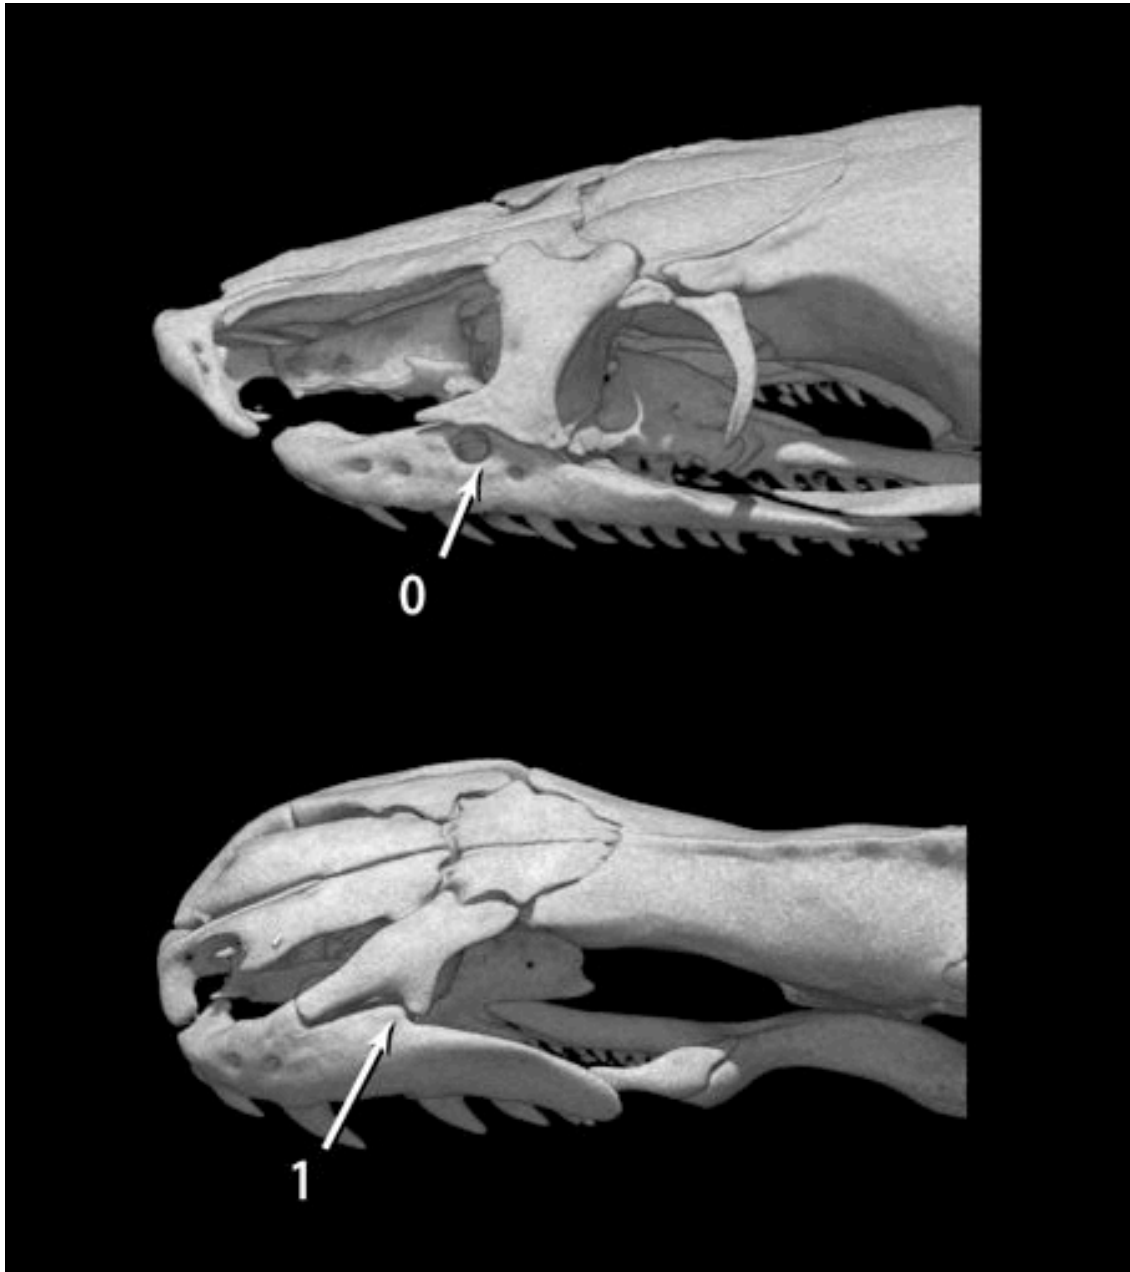

**Character 163 prefrontal notch for maxilla.** Absence of notch (0) shown in *Loxocemus bicolor* (Loxocemidae), tab-and-notch articulation (1) shown in *Cyindrophis ruffus* (Uropeltidae).

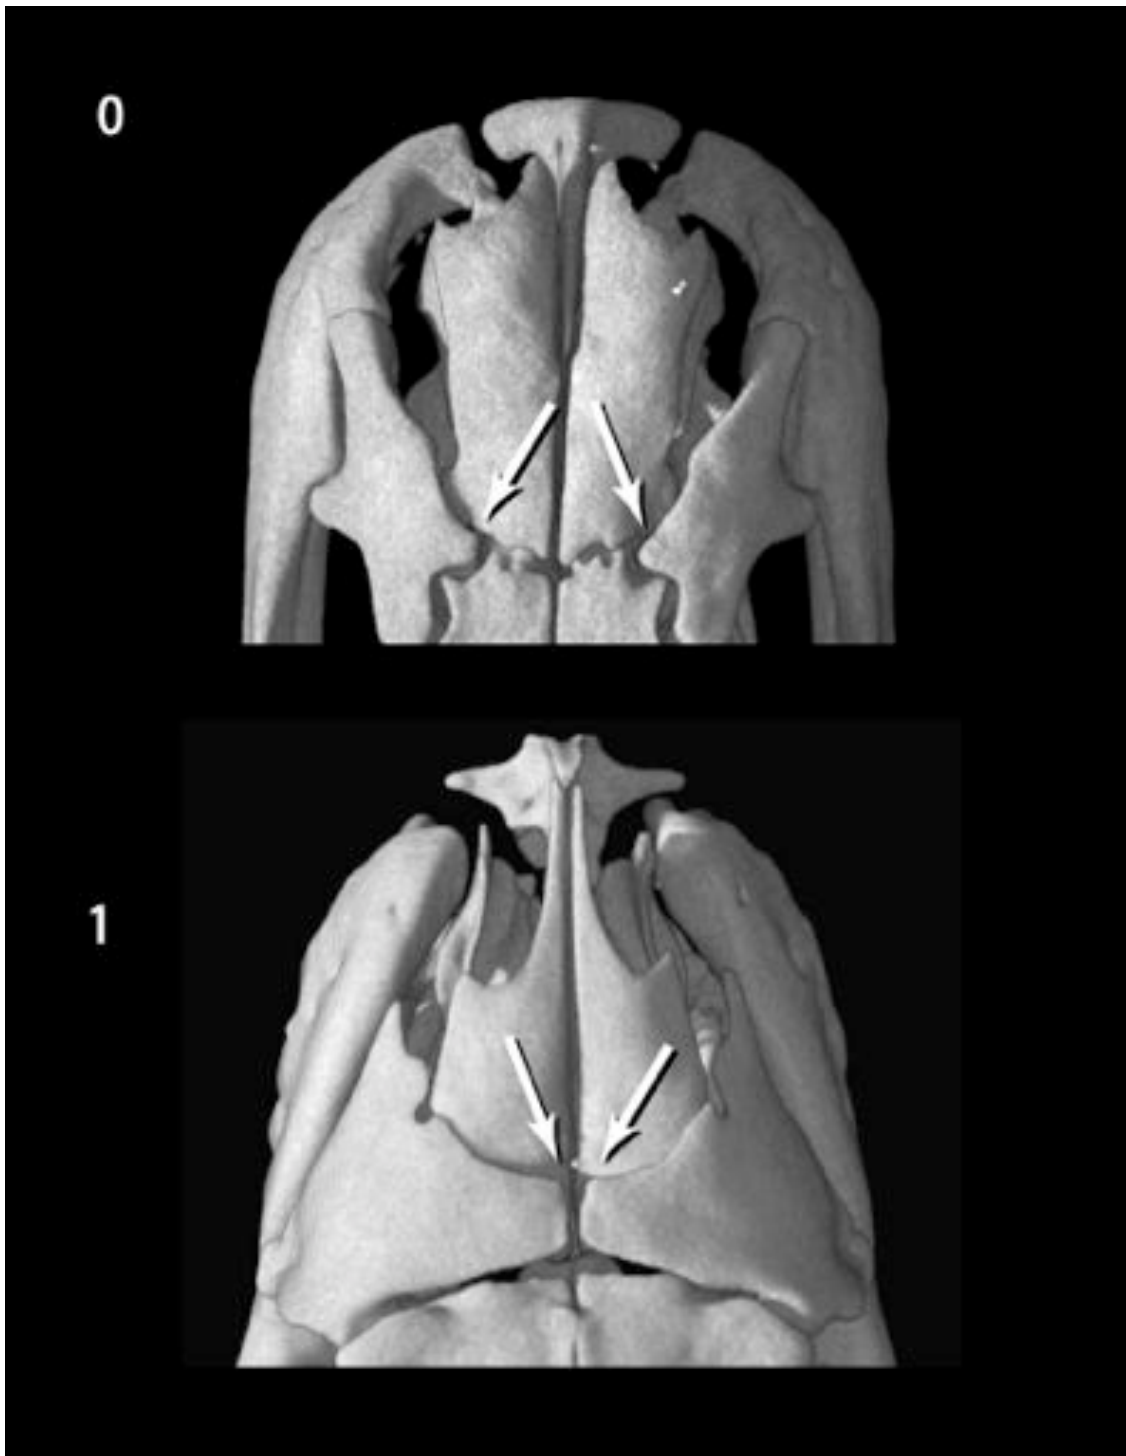

**Character 164 medial extension of nasals towards the midline.** Limited medial expansion of prefrontals (0) shown in *Cylindrophis ruffus* (Uropeltidae), prefrontals extend across almost the entire anterior margin of the frontals (1) shown in *Epicrates striatus* (Boidae).

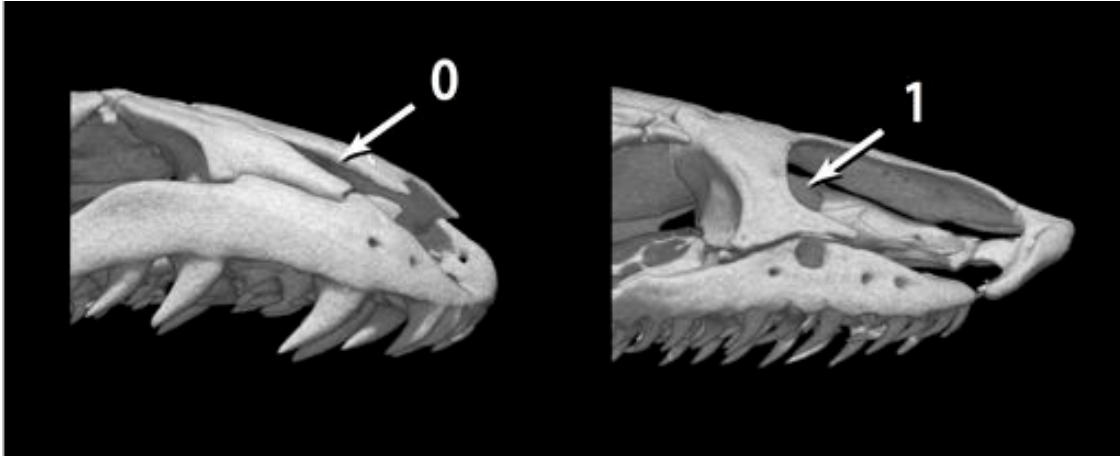

**Character 165 expanded naris.** Weakly developed naris (0) shown in *Anilius scytale* (Aniliidae); strongly concave anterior margin of prefrontal bordering naris (1) shown in *Loxocemus bicolor* (Loxocemidae).

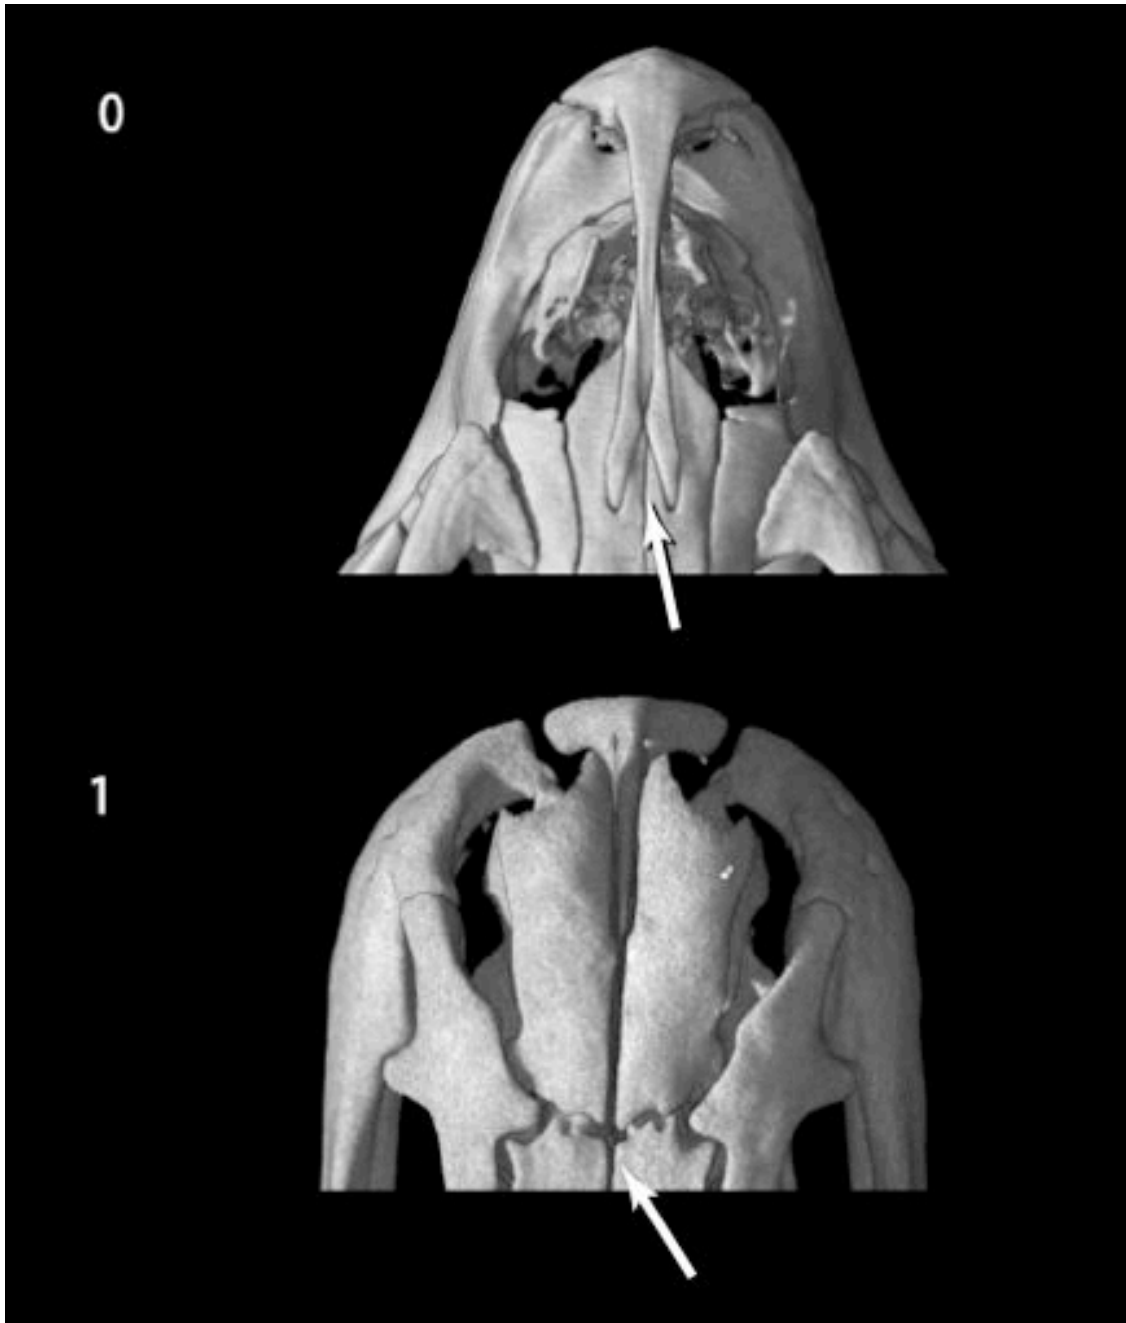

**Character 166 loss of nasal processes of frontals.** Long median processes of frontal projecting between nasals (0) shown in *Varanus exanthematicus* (Varanidae), loss of nasal processes of frontal (1) shown in *Cylindrophis ruffus* (Uropeltidae).

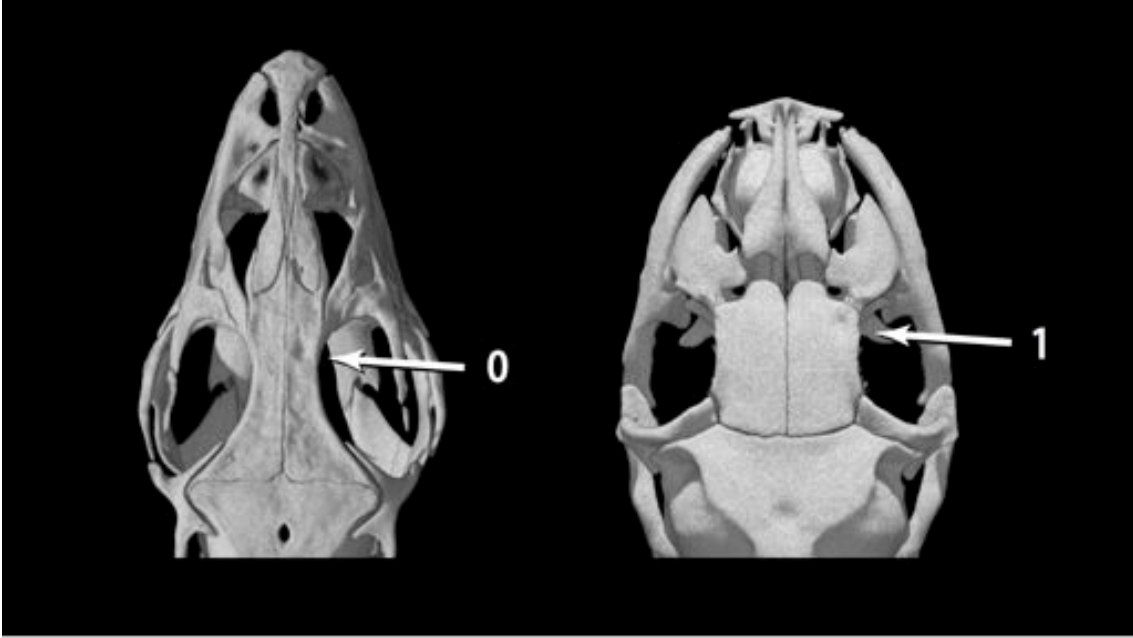

**Character 167, frontals broad anteriorly.** Narrow frontals (0) shown in *Varanus acanthurus* (Varanidae); broad frontals (1) shown in *Tropidophis haetianus* (Tropidophiidae).

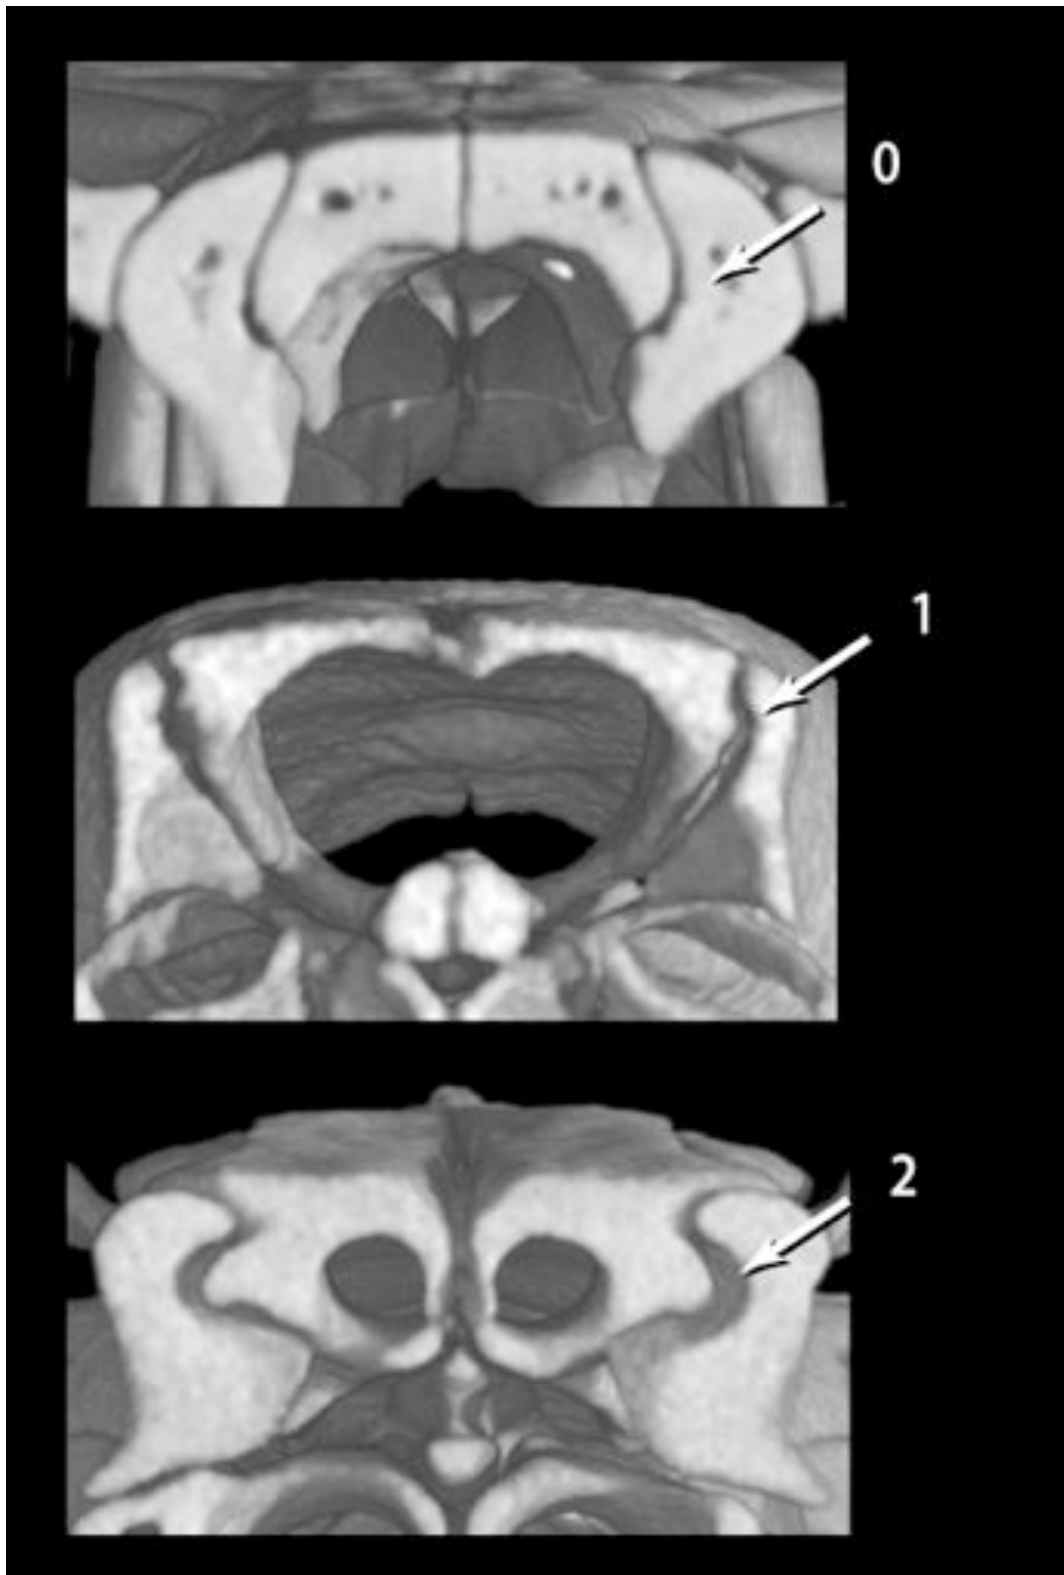

**Character 168, frontal peg for prefrontal.** Akinetic, abutting contact (0) shown in *Varanus exanthematicus* (Varanidae); kinetic joint (1) shown in *Leptotyphlops dulcis* (Scolophidia) kinetic peg-and-socket joint (2) shown in *Cylindrophis ruffus* (Uropeltidae).

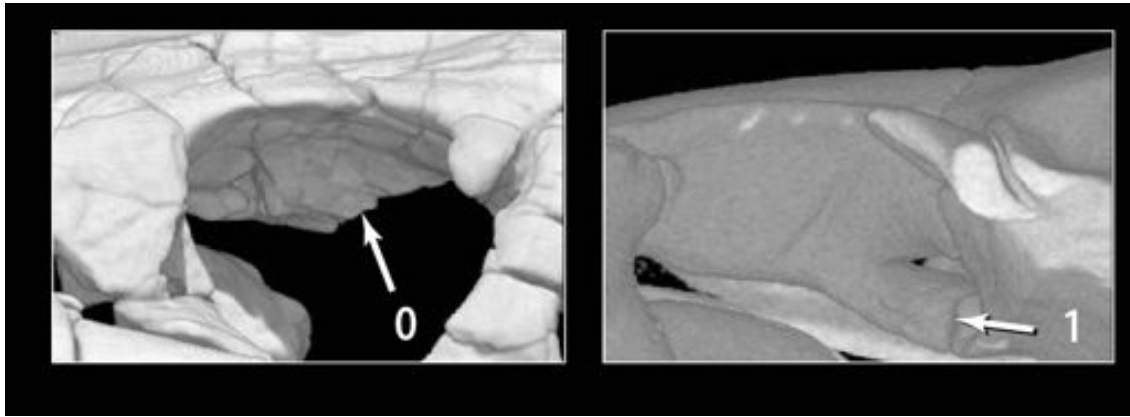

**Character 169, enclosed optic foramen.** Ventrally open braincase (0) shown in *Dinilysia patagonica*; optic foramen enclosed (1) shown in *Tropidophis haetianus* (Tropidophiidae).

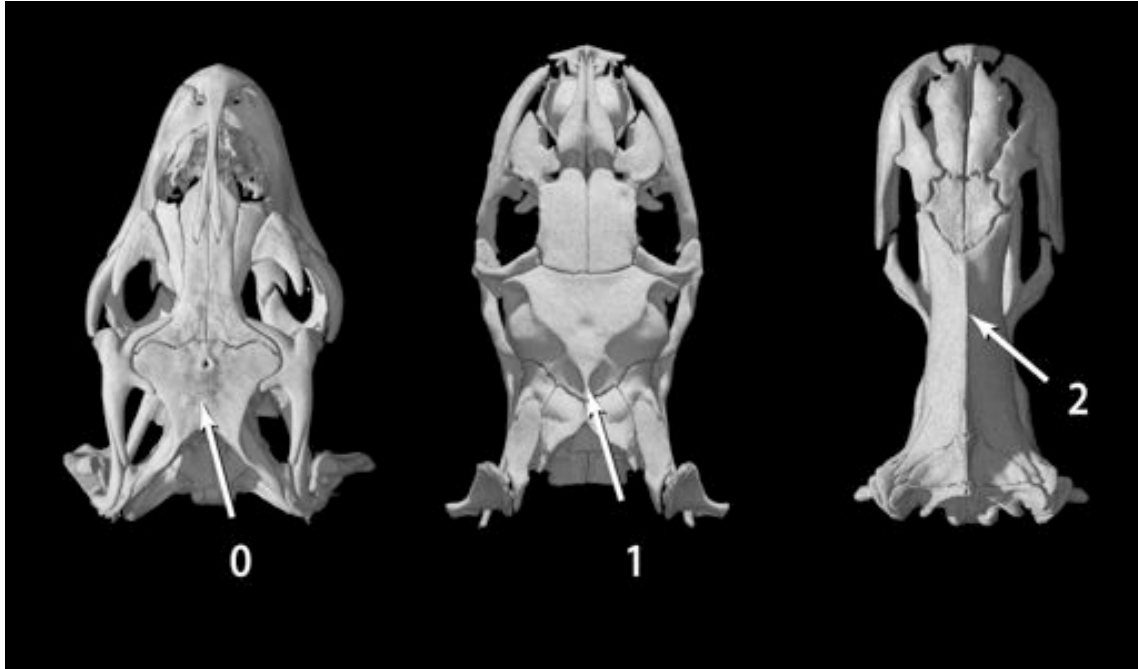

**Character 170 saggital crest.** Absence of parietal saggital crest (0) shown in *Varanus exanthematicus* (Varanidae), short parietal saggital crest (1) shown in *Tropidophis haetianus* (Tropidophiidae), elongate parietal saggital crest (2) shown in *Cylindrophis ruffus* (Uropeltidae).



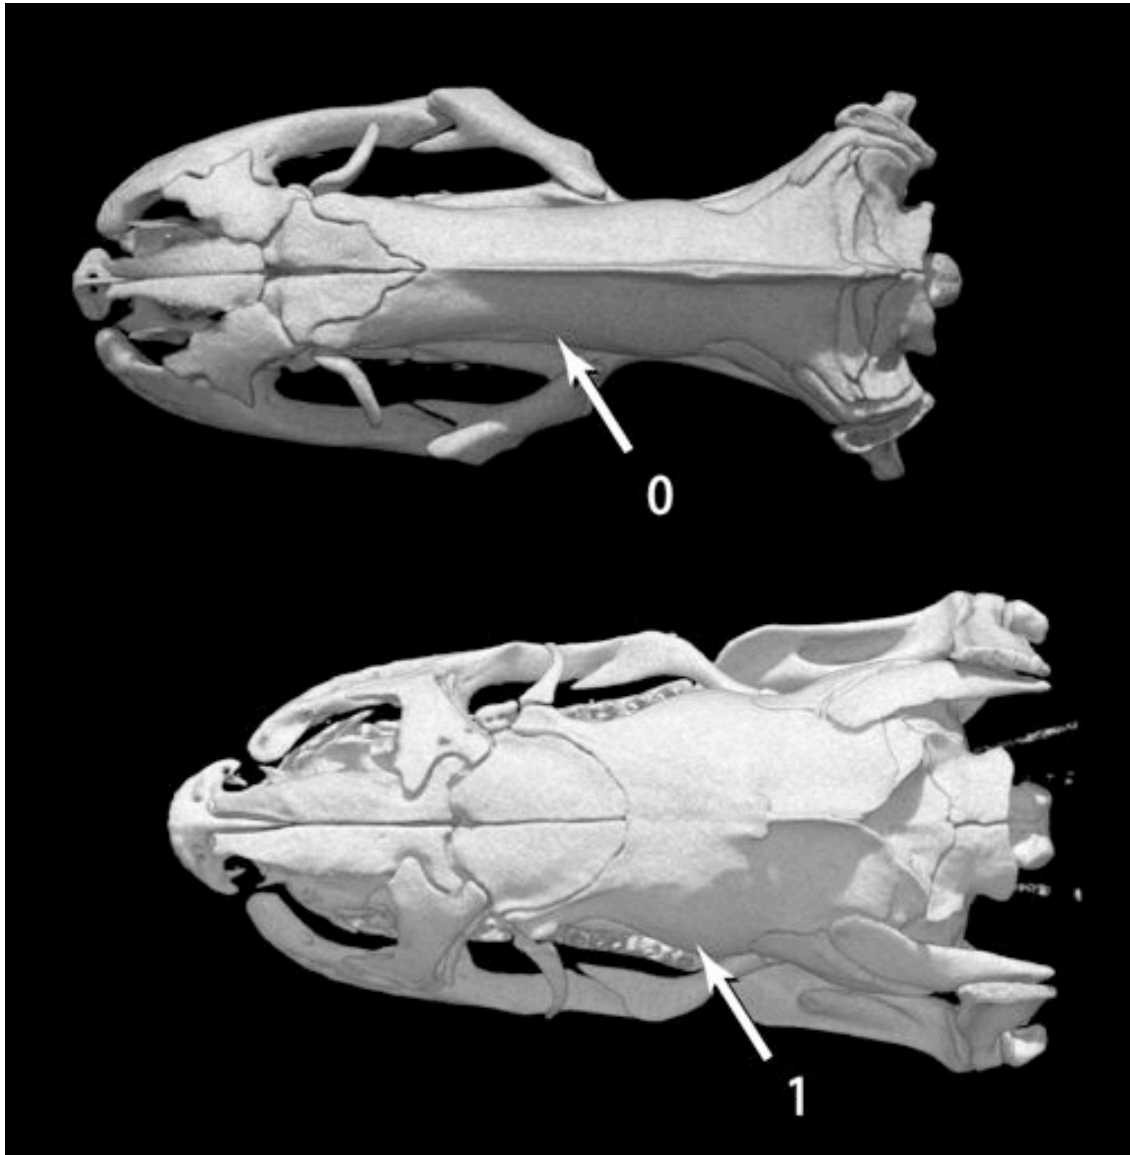

**Character 171 inflated parietal.** Uninflated parietal (0) shown in *Cylindrophis ruffus* (Uropeltidae), inflated postorbital region of parietal (1) shown in *Loxocemus bicolor* (Loxocemidae).

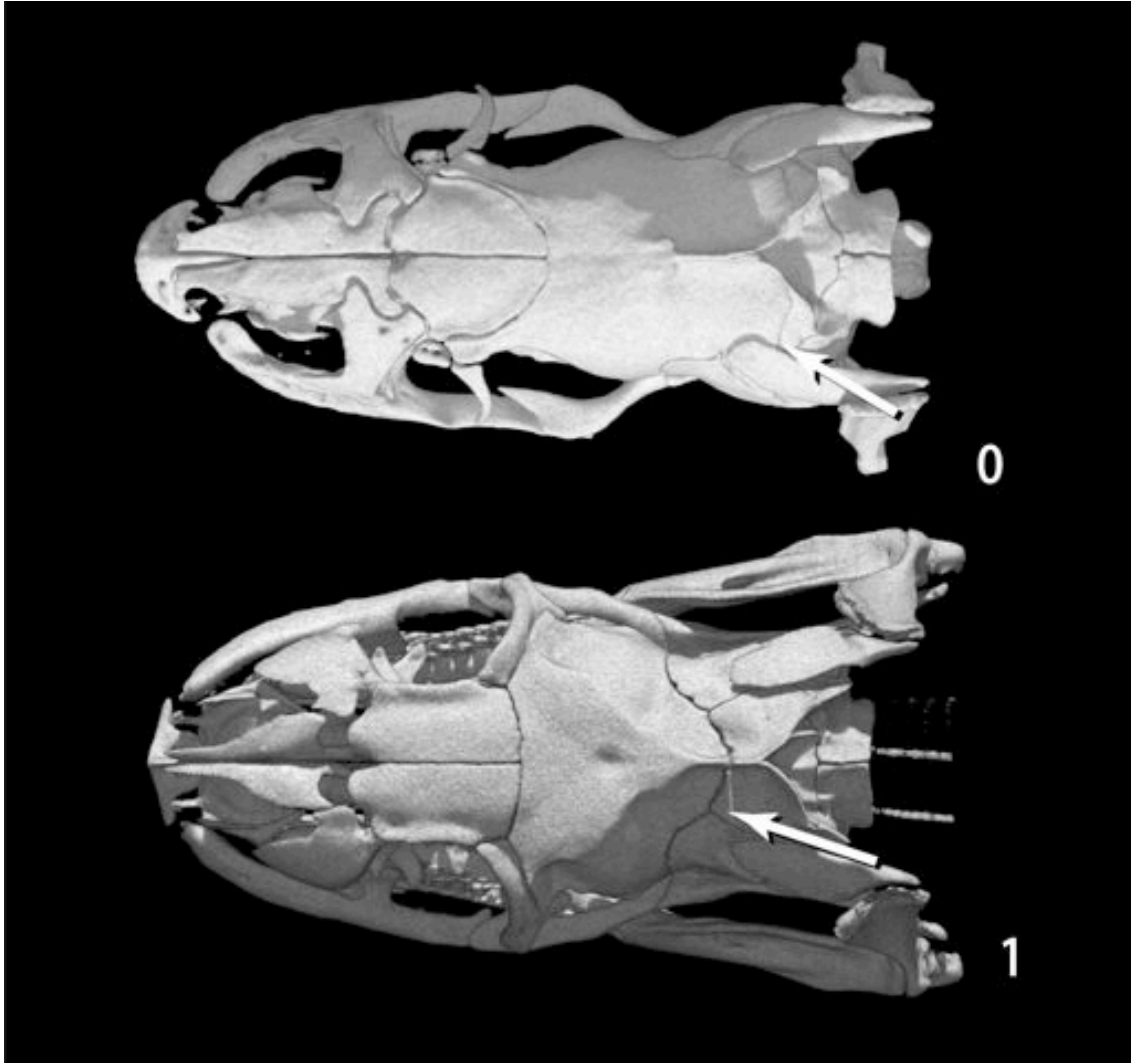

**Character 172 posteriorly narrow parietal.** Posteriorly broad parietal (0) shown in *Loxocemus bicolor* (Loxocemidae) (1); posteriorly narrow parietal (1) shown in *Tropidophis haetianus* (Tropidophiidae)

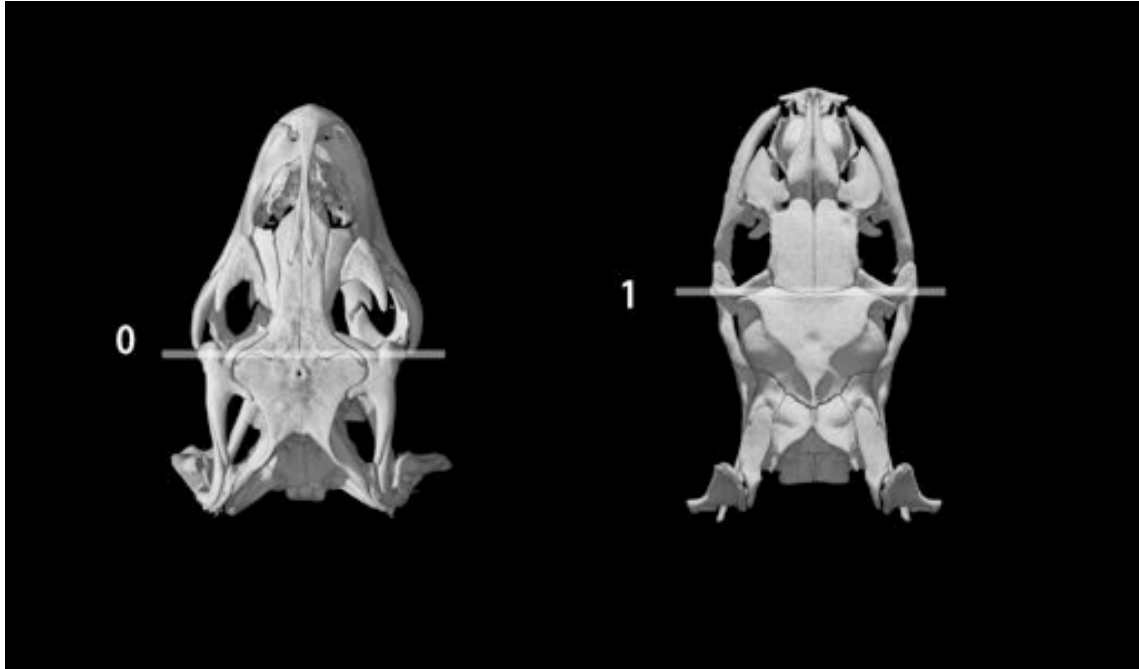

**Character 173 elongate postorbital region of the skull.** Short postorbital region (0) shown in *Varanus exanthematicus* (Varanidae), long postorbital region (1) shown in *Tropidophis haetianus* (Tropidophiidae).

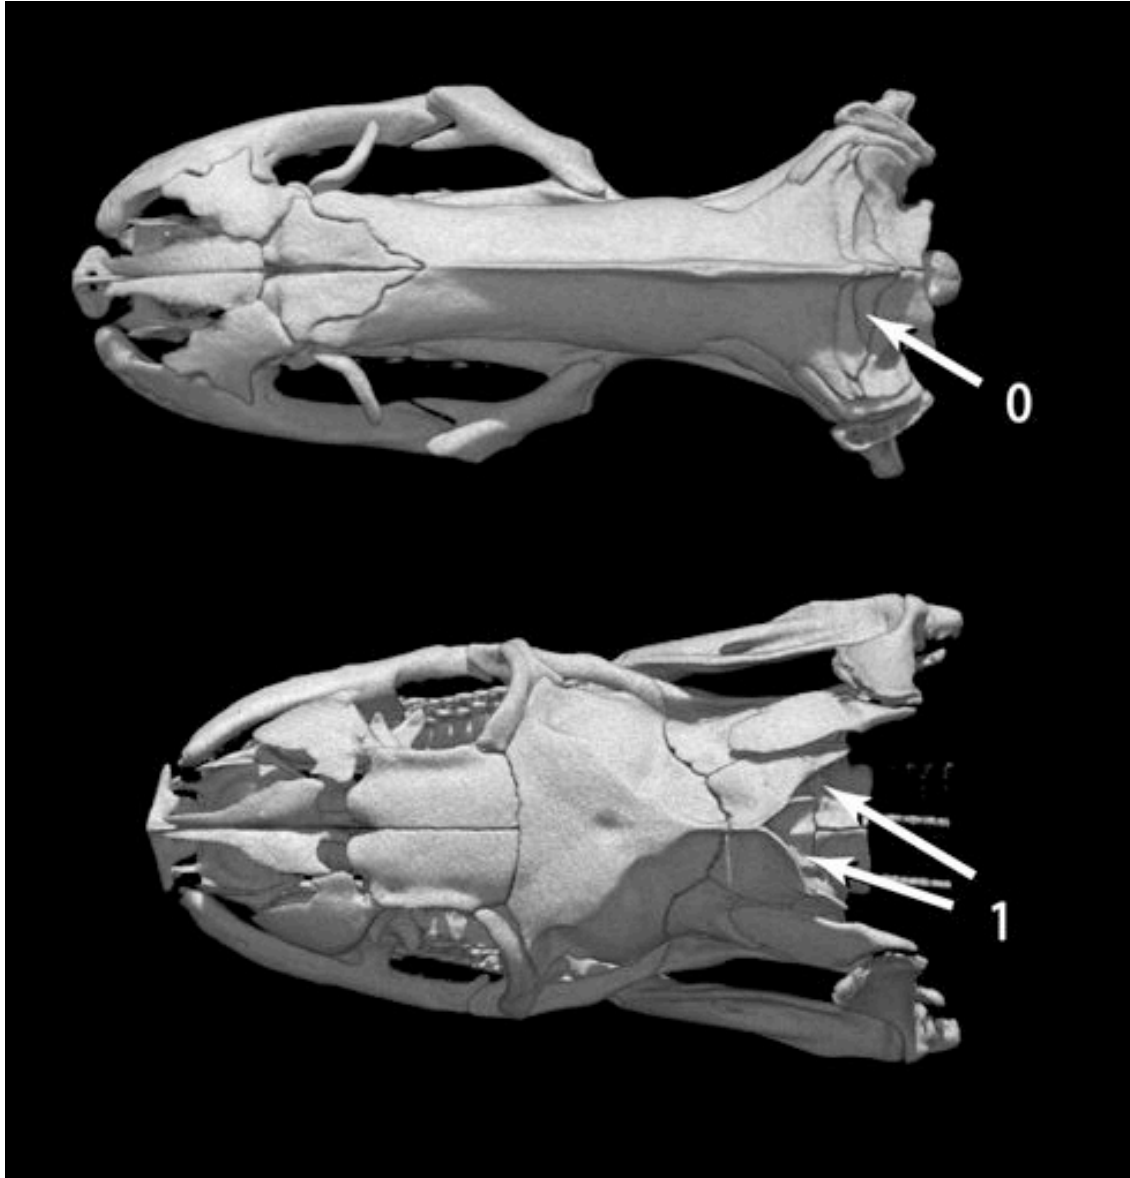

**Character 174 nuchal crests of supraoccipital.** Absence of transverse crest (0) shown in *Cylindrophis ruffus* (Uropeltidae), prominent transverse crests on supraoccipital and/or parietal (1) shown in *Tropidophis haetianus* (Tropidophiidae).

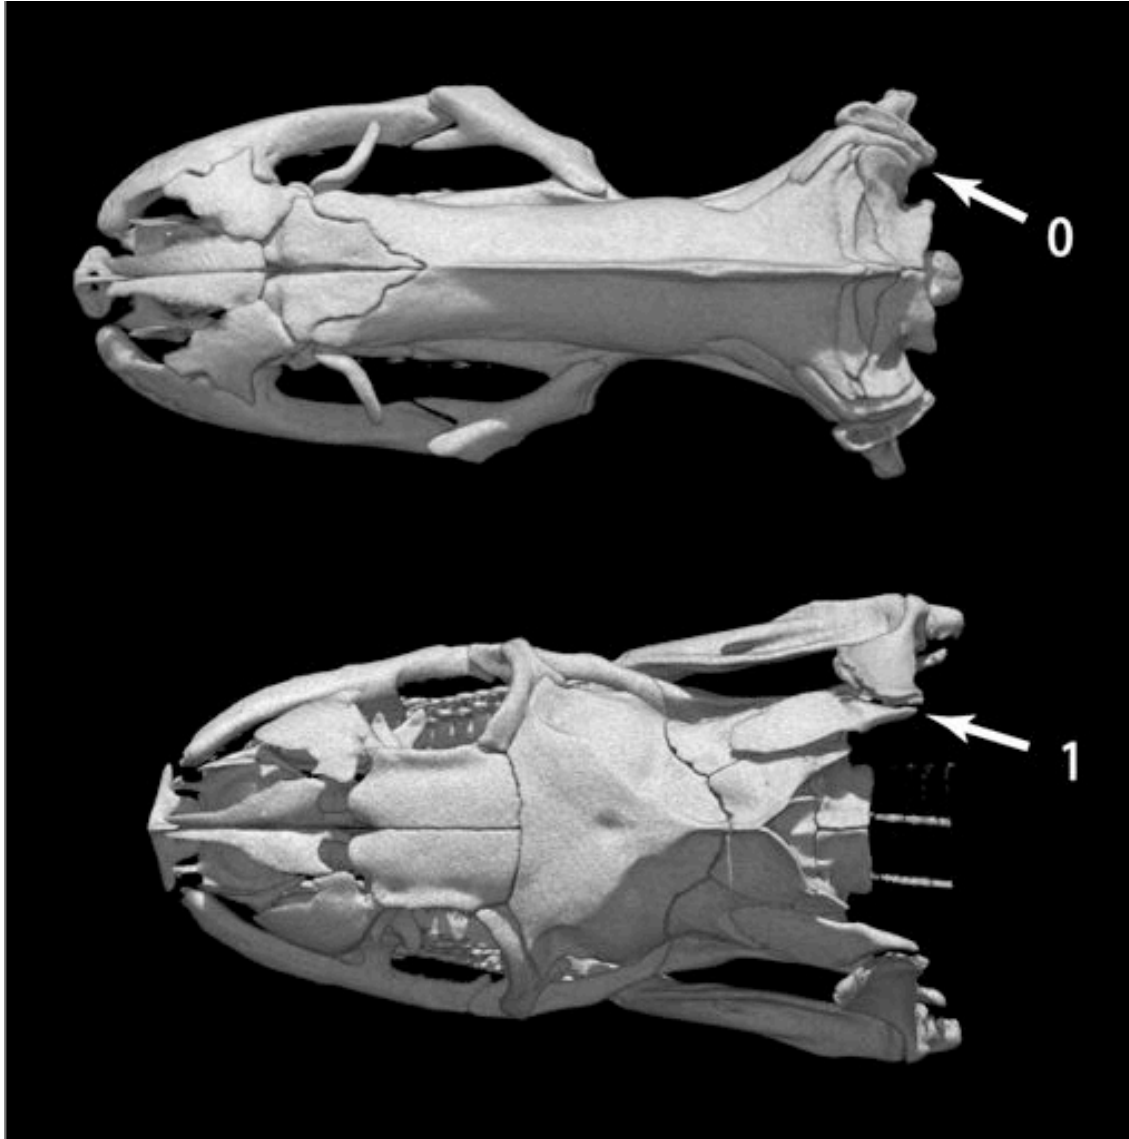

**Character 175 elongate supratemporal.** Supratemporal does not project beyond paroccipital process (0) shown in *Cylindrophis ruffus* (Uropeltidae), supraoccipital projects beyond paroccipital process (1) shown in *Tropidophis haetianus* (Tropidophiidae).

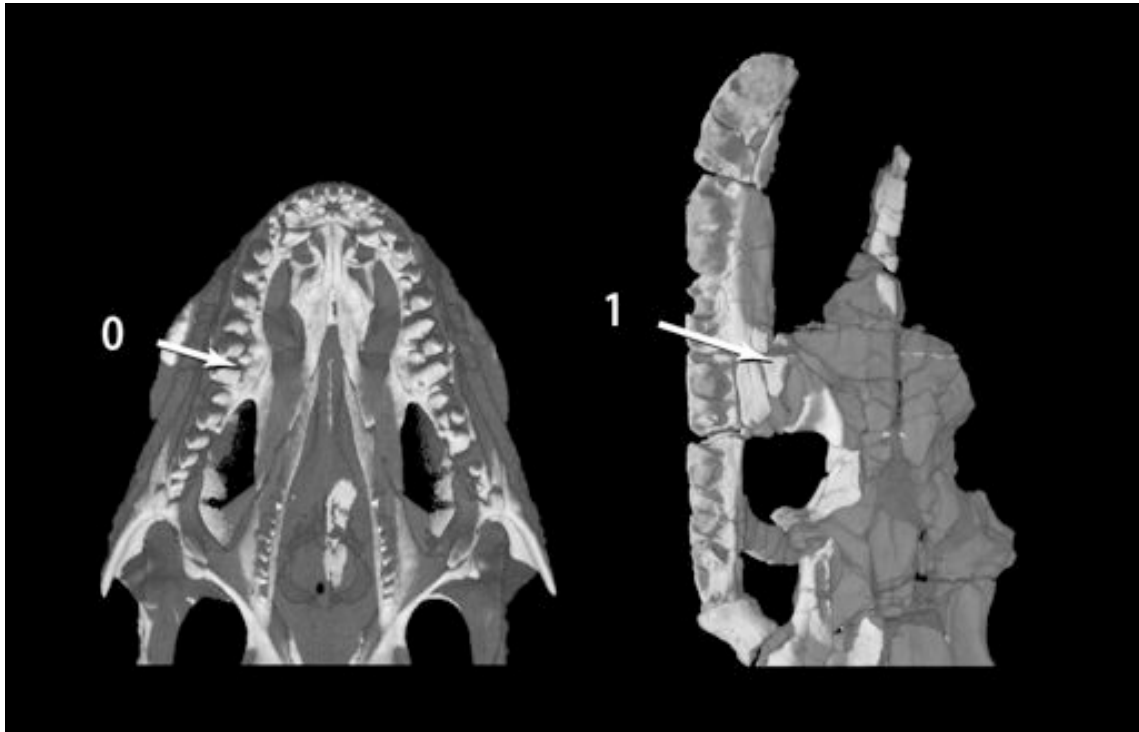

**Character 176 medially projected palatine process.** Short palatine process (0) shown in *Shinisaurus crocodilurus* (Xenosauridae), large palatine process (1) shown in *Dinilysia patagonica*.

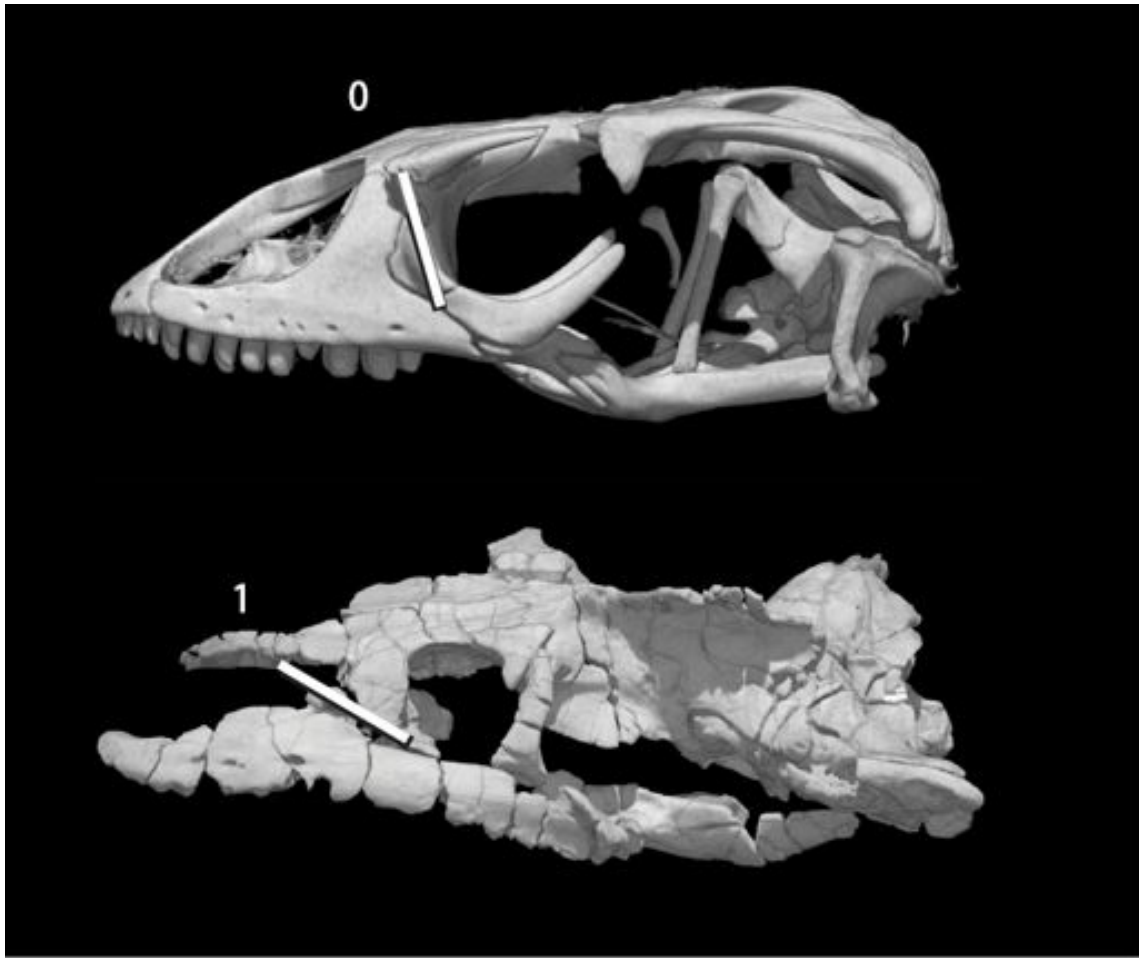

**Character 177 dorsally oriented posterior margin of the maxilla.** Steeply inclined posterior margin of maxillary facial process (0) shown in *Varanus exanthematicus* (Varanidae), anteriorly inclined margin of facial process (1) shown in *Dinilyisia patagonica*.

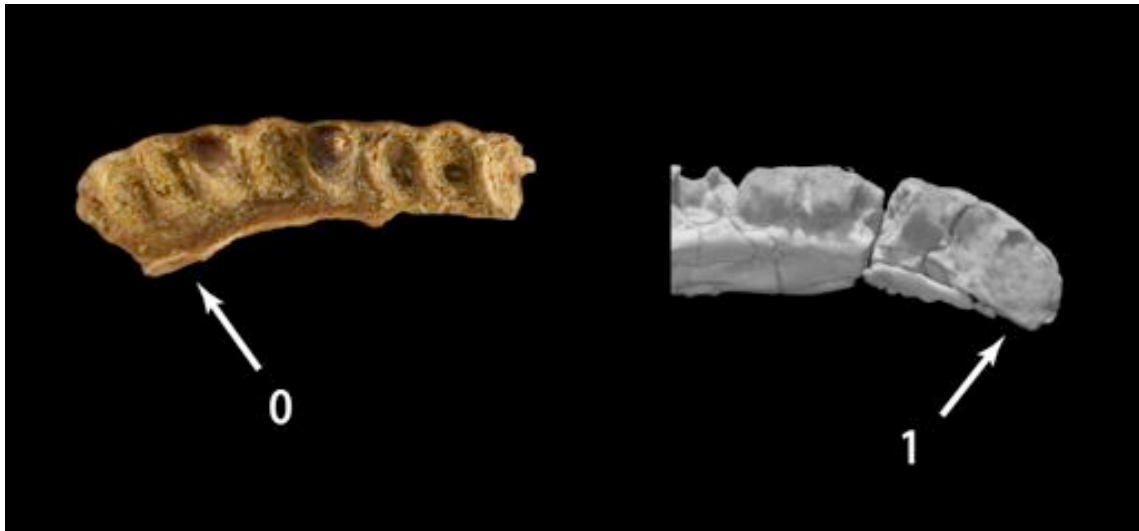

**Character 178, reduced vomerine process.** Large vomerine process (0) shown in *Coniophis precedens*; loss of vomerine process (1) shown in *Dinilysia patagonica*.



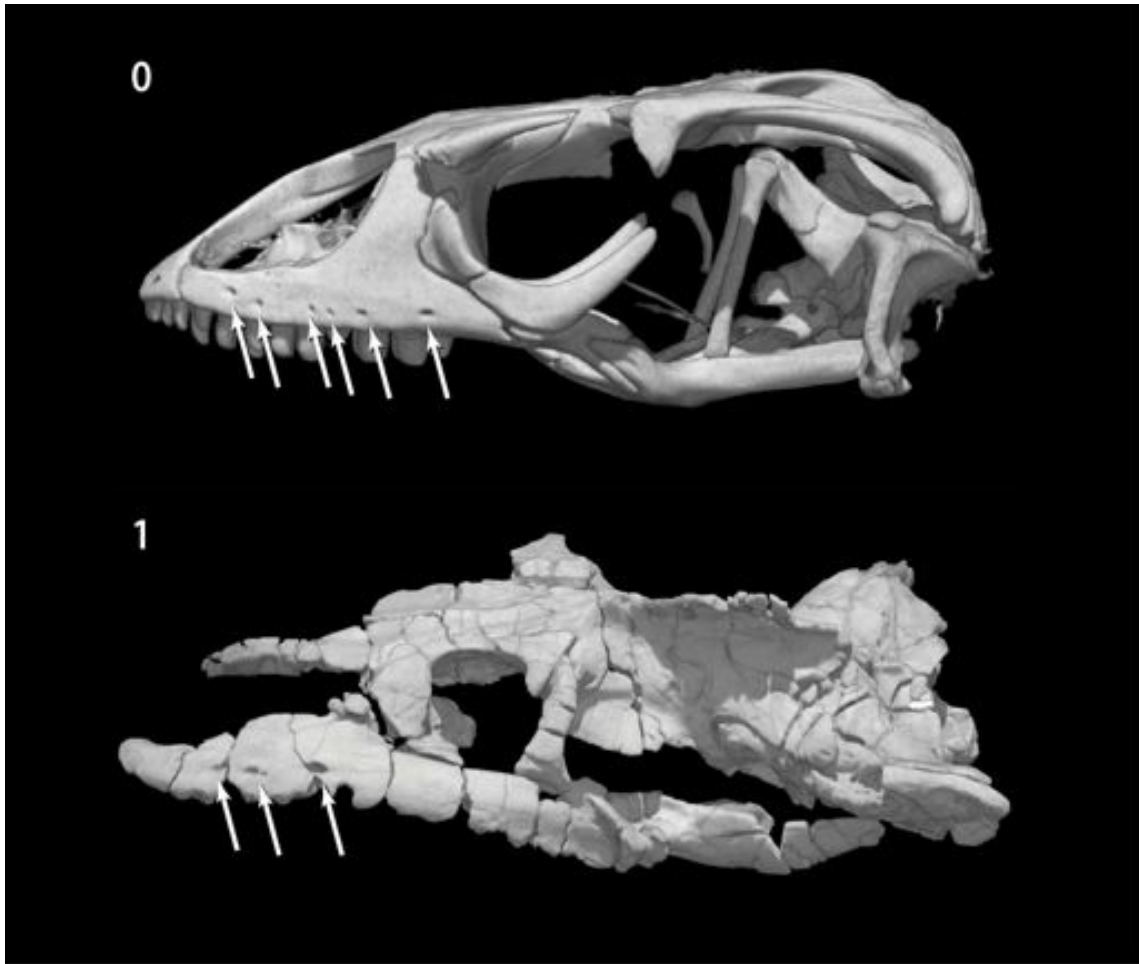

**Character 179, Reduced number of mental foramina.** Multiple mental foramina (0) shown in *Varanus exanthematicus* (Varanidae); fewer than five mental foramina (1) shown in *Dinilysia patagonica*.

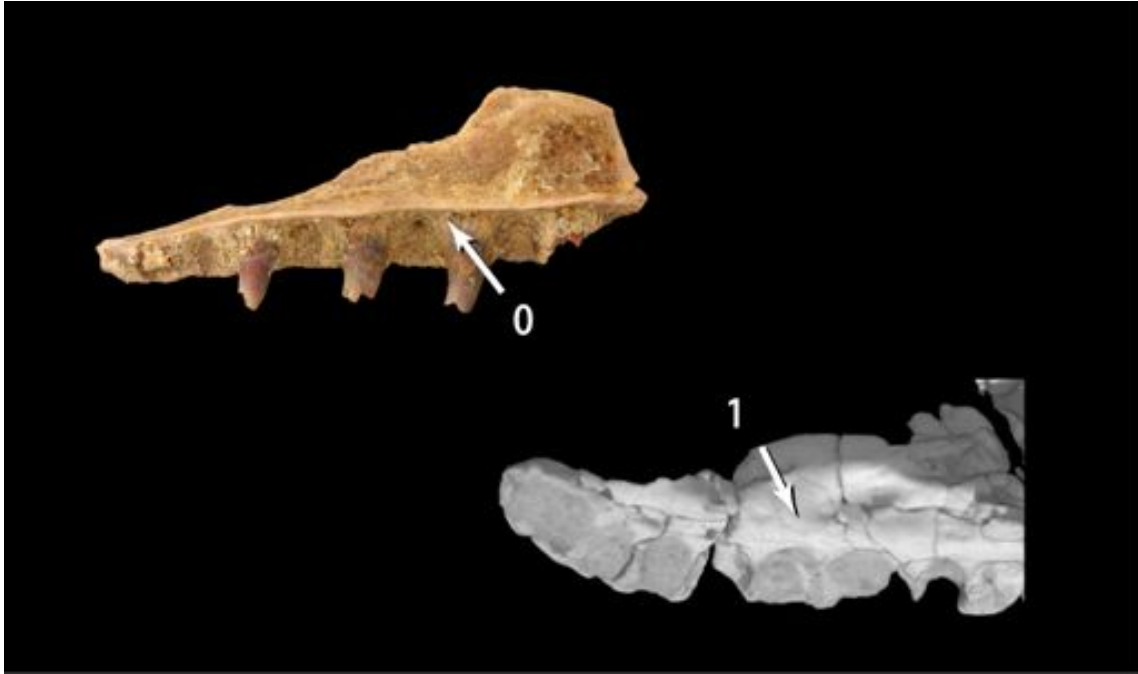

**Character 180, development of supradental shelf.** Supradental shelf(0) shown in *Coniophis precedens*; loss of supradental shelf (1) shown in *Dinilysia patagonica*.

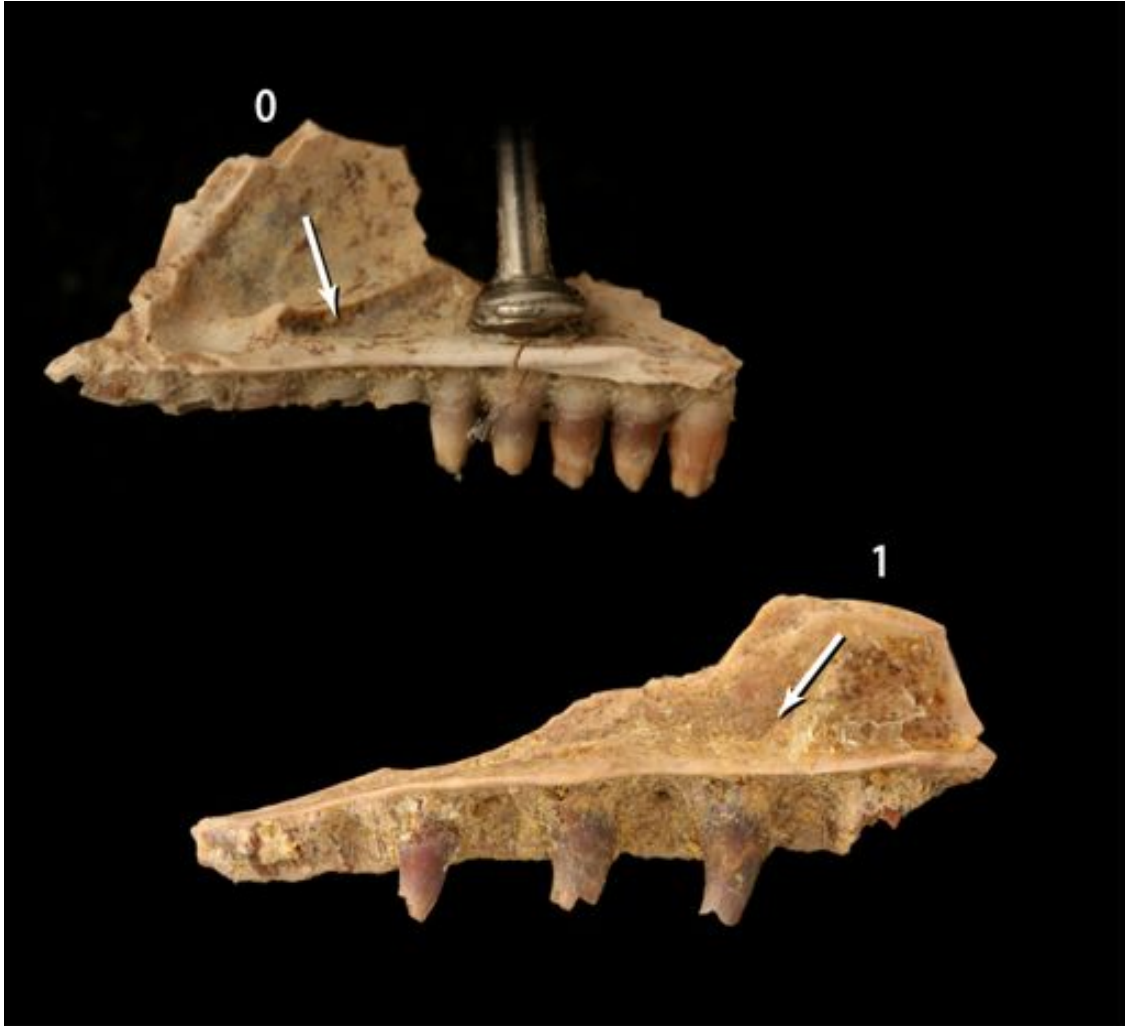

**Character 181, Lacrimal fossa reduced.** Lacrimal fossa (0) shown in *Chamops segnis*; absence of lacrimal fossa (1) shown in *Coniophis precedens*.

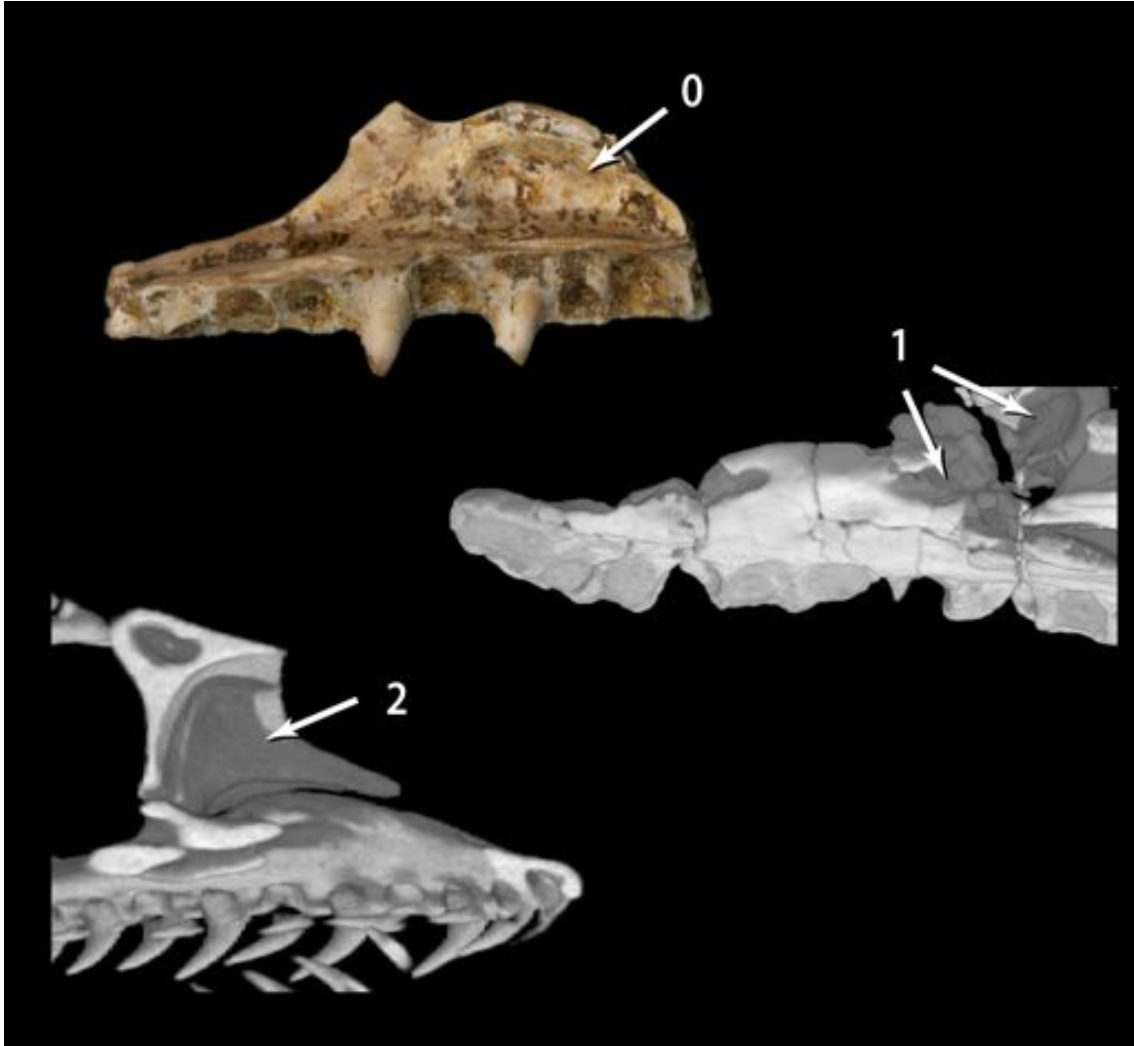

**Character 182, fossa for nasal capsule.** Large fossa for nasal capsule on the maxilla (0) shown in *Coniophis precedens*; small, posteriorly positioned fossa on maxilla (1) shown in *Dinilysia patagonica*; development of fossa exclusively on prefrontal [2] shown in sagittal cut of *Loxocemus bicolor* (Loxocemidae).

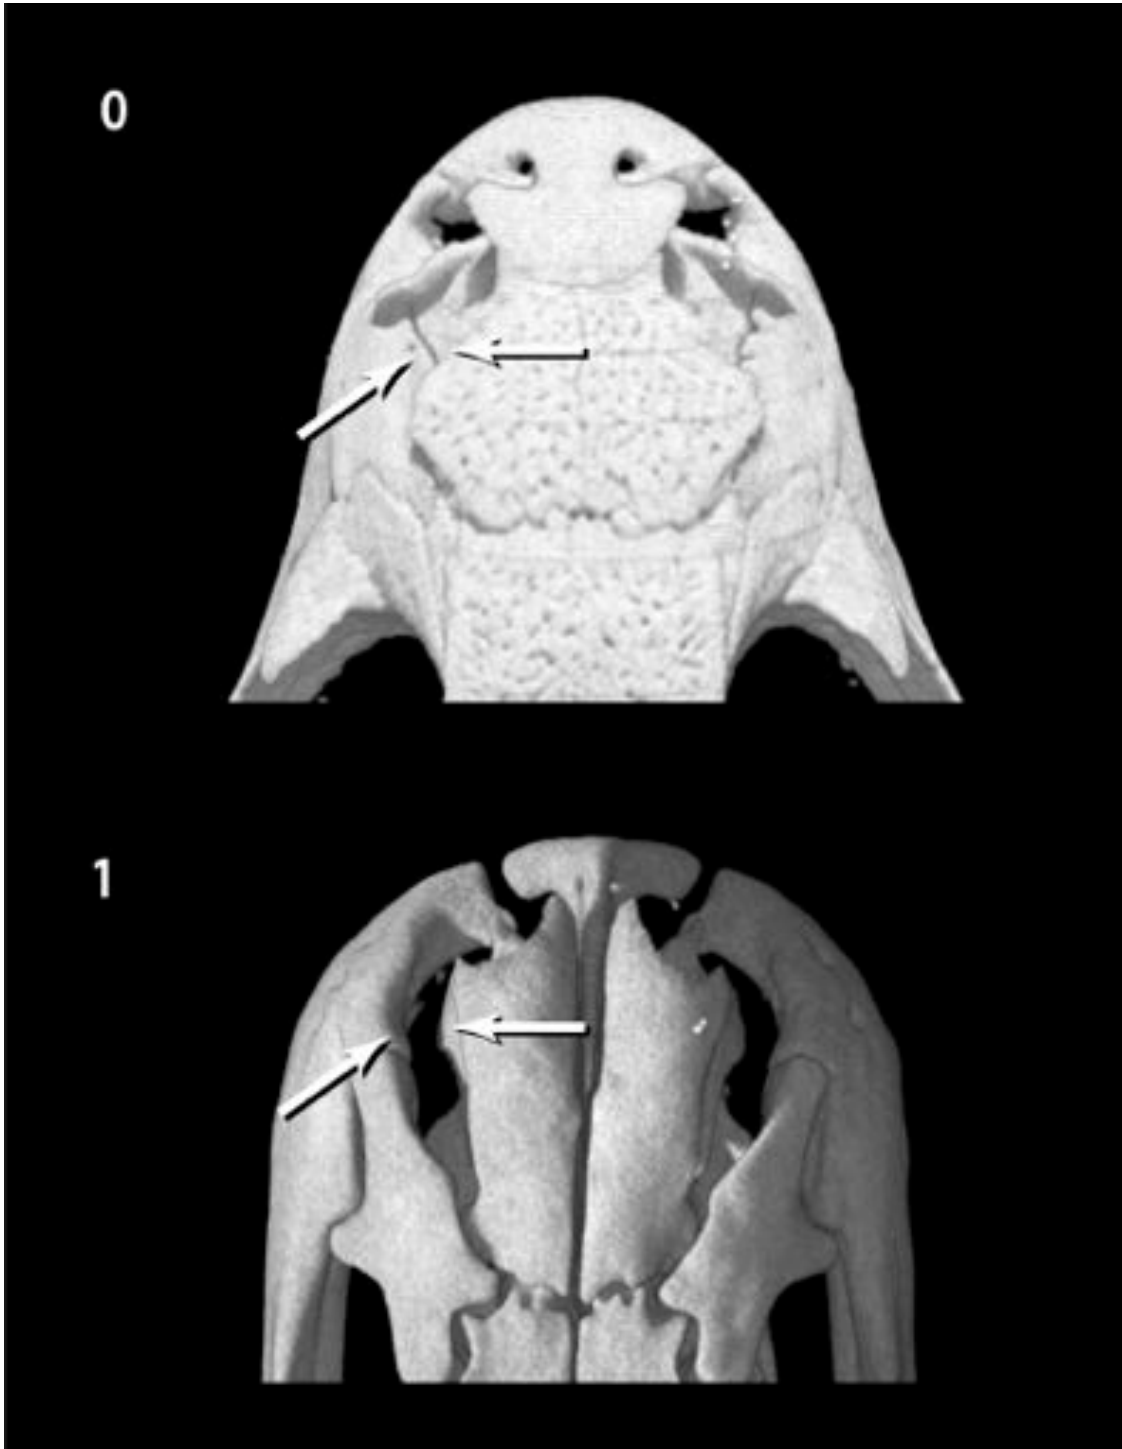

**Character 183 nasals do not contact maxilla.** Nasal-maxilla contact (0) shown in *Celestus enneagrammus* (Anguillidae); loss of nasal-maxilla contact (1) shown in *Anilius scytale* (Aniliidae).

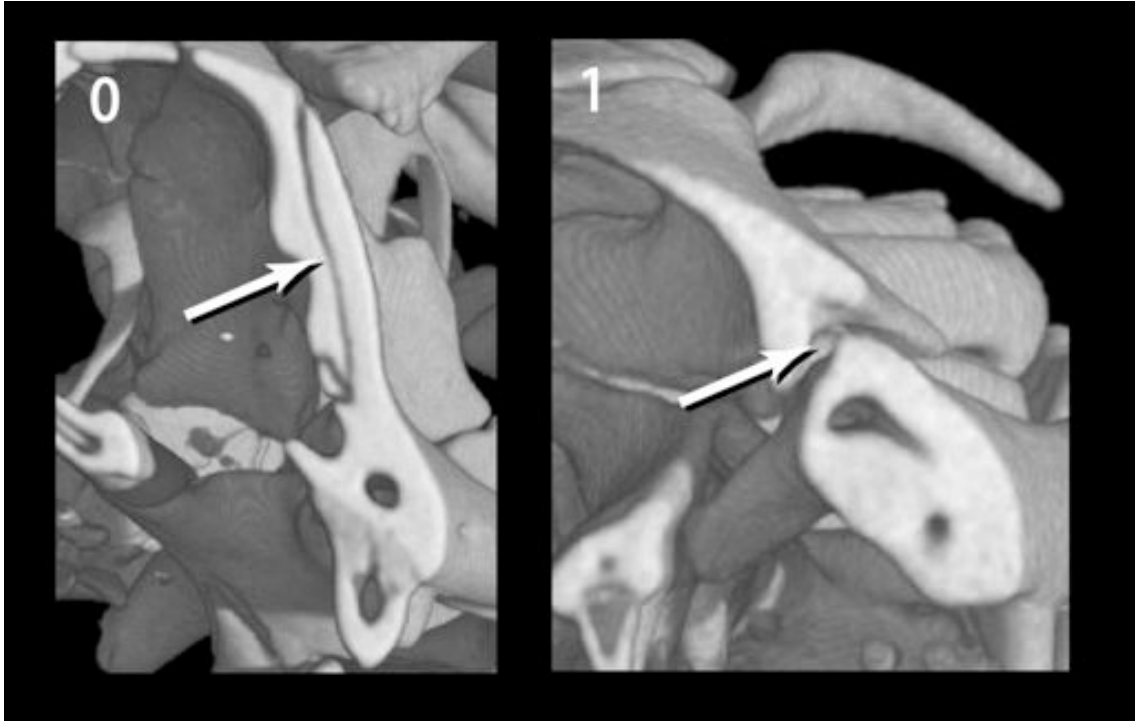

**Character 184 maxilla-prefrontal contact.** Prefrontal overlapped by maxilla laterally (0) shown in *Varanus exanthematicus* (Varanidae); prefrontal sits atop maxilla (1) shown in *Cylindrophis ruffus* (Uropeltidae).

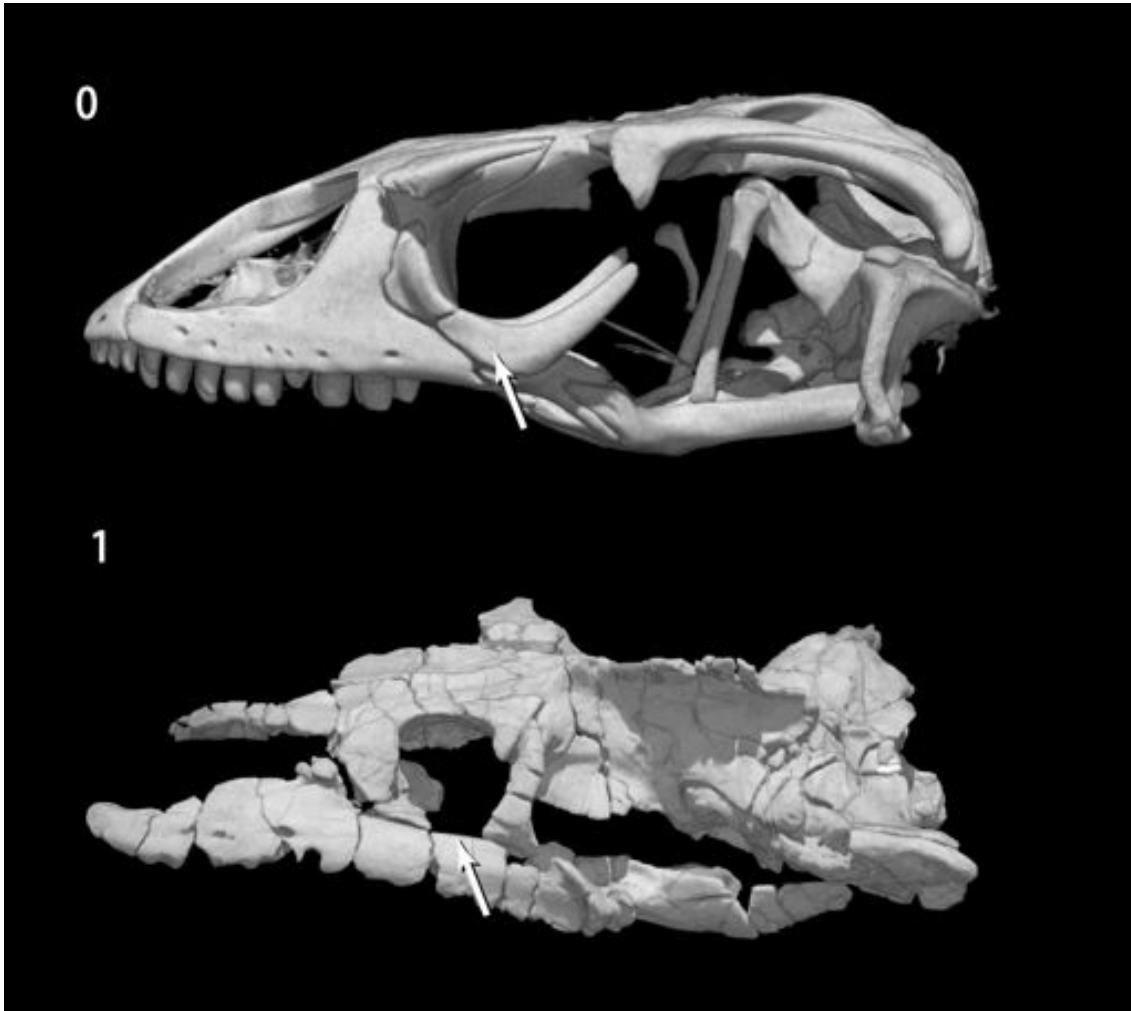

**Character 185, Jugal contribution to orbit.** Jugal contribution to anteroventral margin of orbit (0) shown in *Varanus exanthematicus* (Varanidae); absence of jugal from anteroventral margin of orbit (1) shown in *Dinilysia patagonica*.

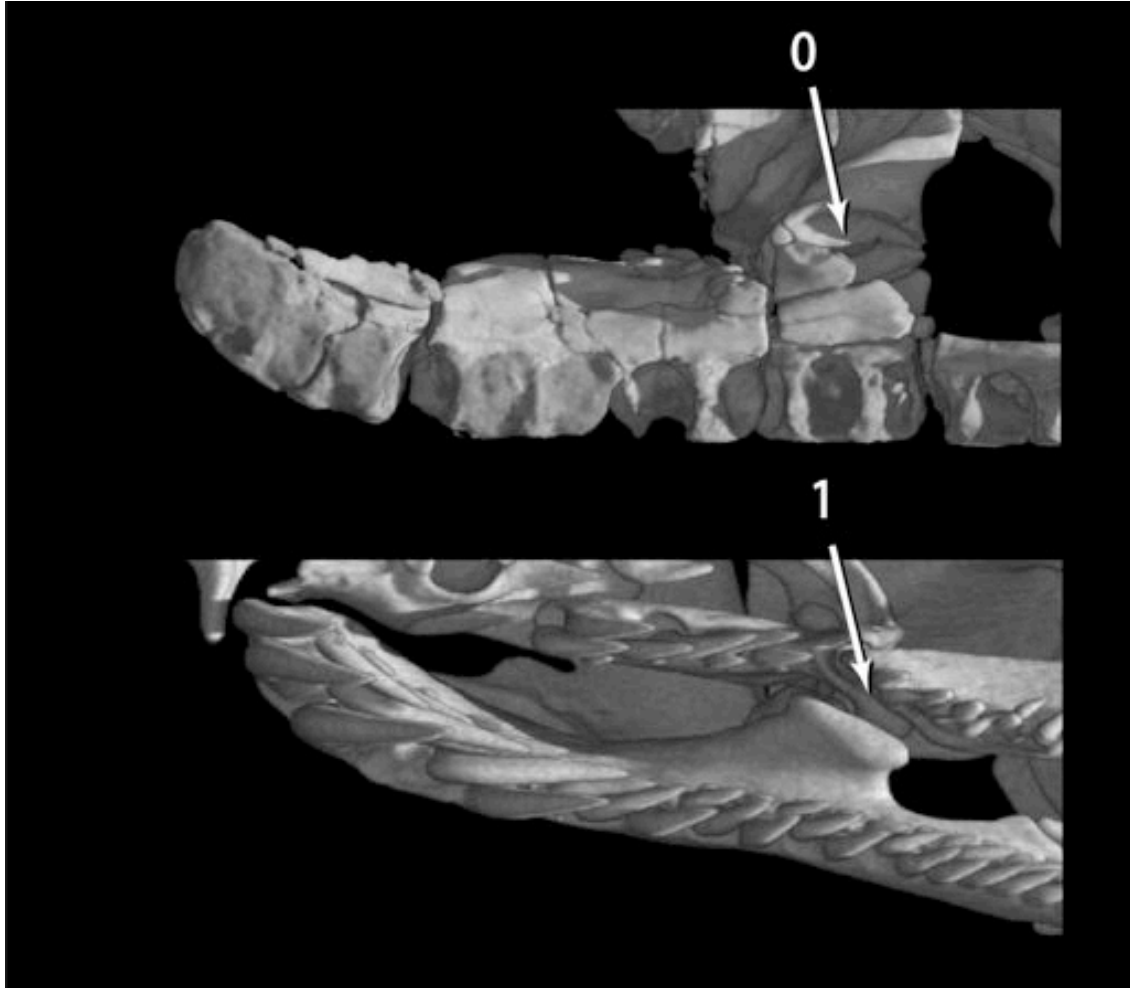

**Character 186, pendant palatine process of maxilla.** Medially projecting palatine process (0) shown in *Dinilysia patagonica* (0), pendant palatine process (1) shown in *Epicrates striatus* (Boinae).



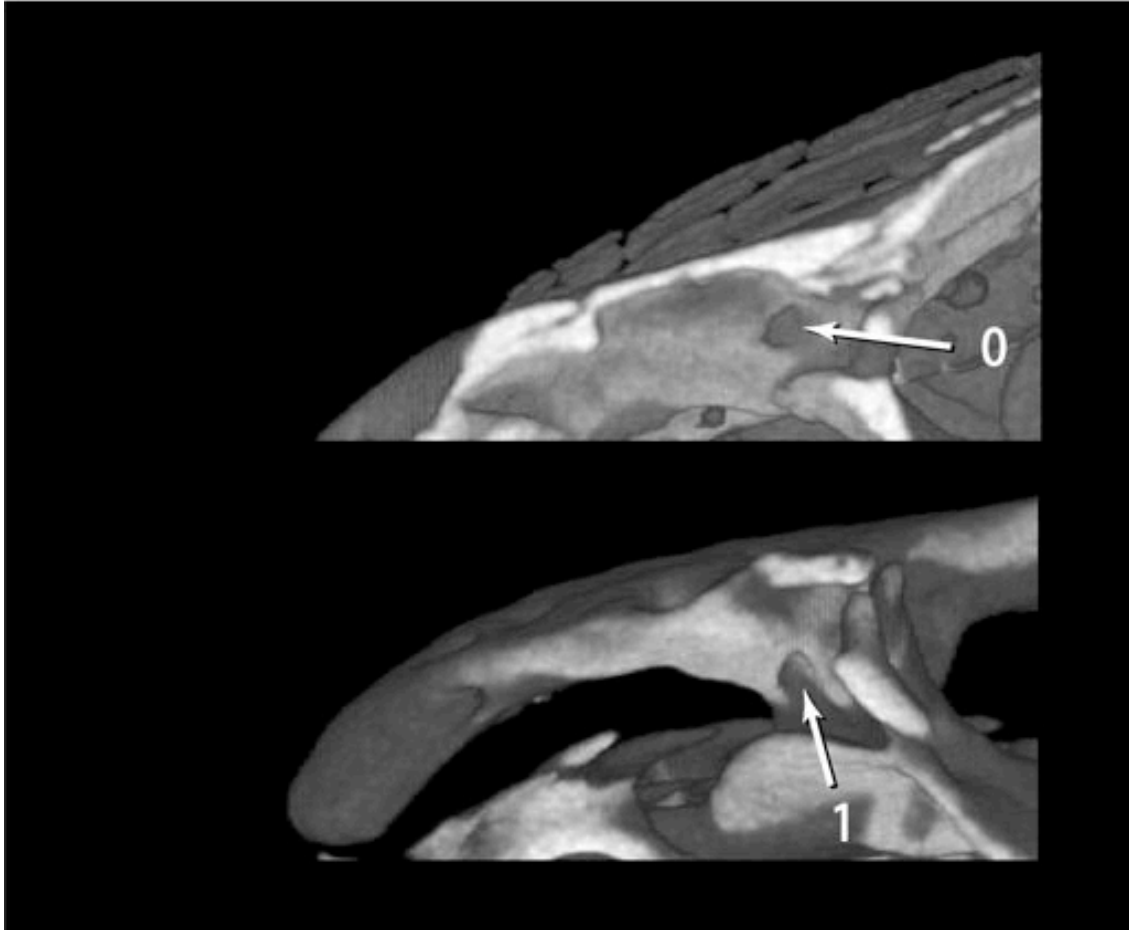

**Character 187, orientation of maxillary superior alveolar foramen.** Centrally placed, dorsally opening superior alveolar foramen (0) shown in horizontal cut of *Celestus enneagrammus* (Anguidae) showing the maxilla in dorsal view (0), anteriorly positioned, medially opening foramen (1) shown in dorsal view of maxilla *Loxocemus bicolor* (Loxocemidae).

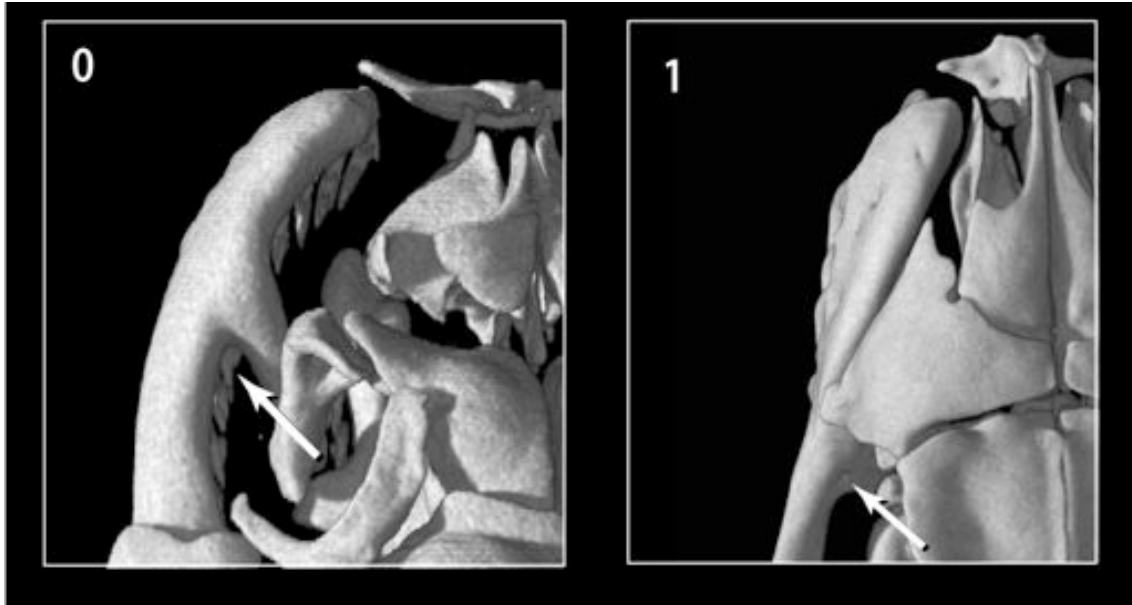

**Character 188, accessory foramen of maxilla.** Absence of foramen (0) shown in *Acrochordus granulatus* (Acrochordidae), accessory foramen of maxilla (1) shown in *Epicrates striatus* (Boinae).

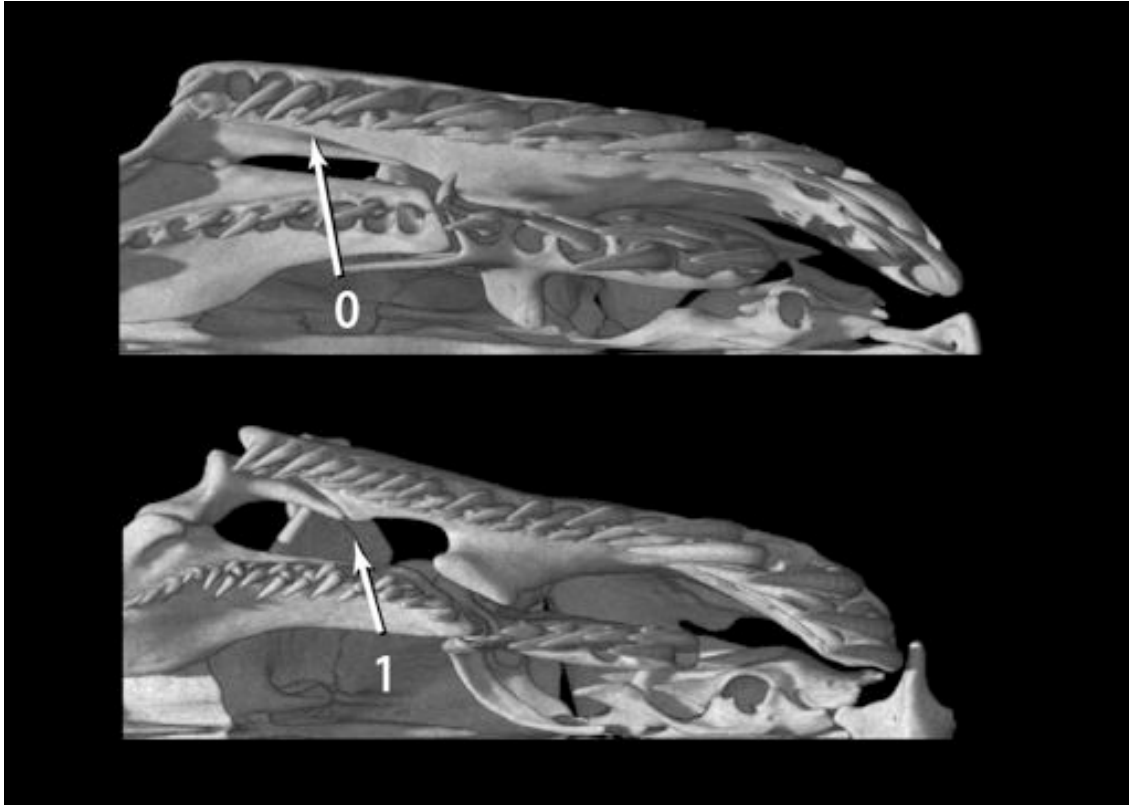

**Character 189, ectopterygoid process of maxilla.** Absence of ectopterygoid process of maxilla (0) shown in *Python molurus* (Pythoninae) (0), ectopterygoid process of maxilla (1) shown in *Epicrates striatus* (Boinae).

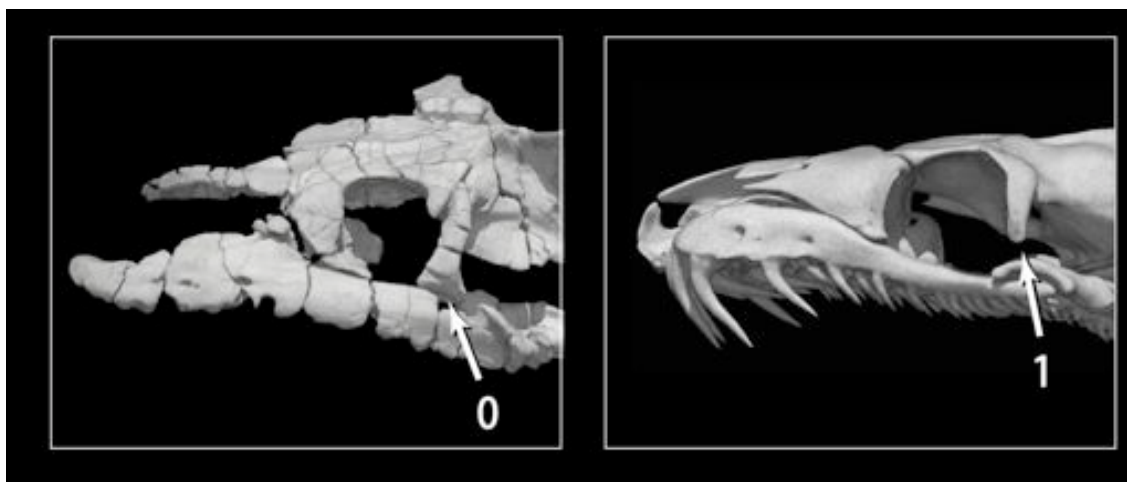

**Character 190, complete postorbital bar.** Postorbital bar contacting maxilla (0) shown in *Dinilyisia patagonica*; incomplete postorbital bar shown in *Epicrates striatus* (Boinae).

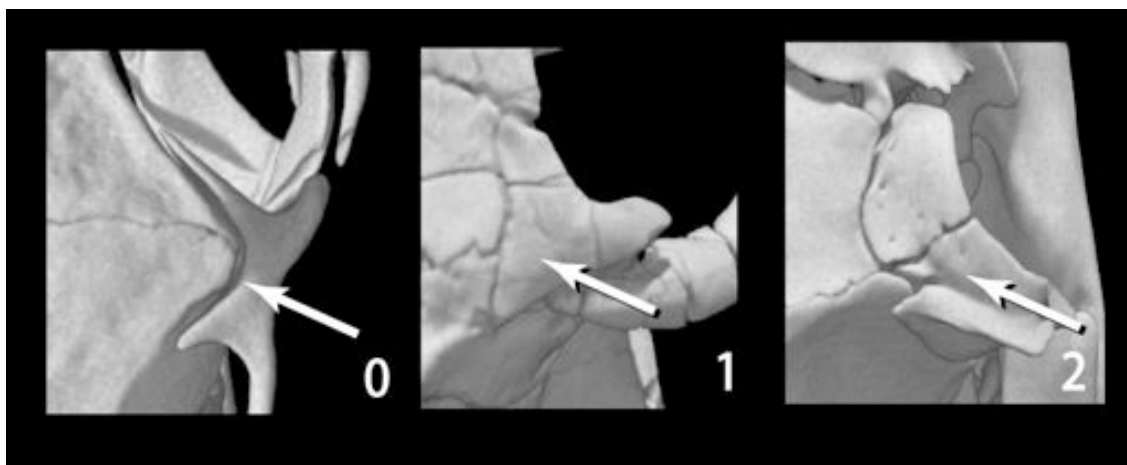

**Character 192, postfrontal shape.** Triradiate postfrontal clasps frontal and parietal (0) shown in *Varanus acanthurus* (Varanidae); triradiate postfrontal abutting frontal and parietal (1) shown in *Dinilyisia patagonica*; reduced prefrontal lacking distinct anterior and posterior processes (2) shown in *Python molurus* (Pythoninae).

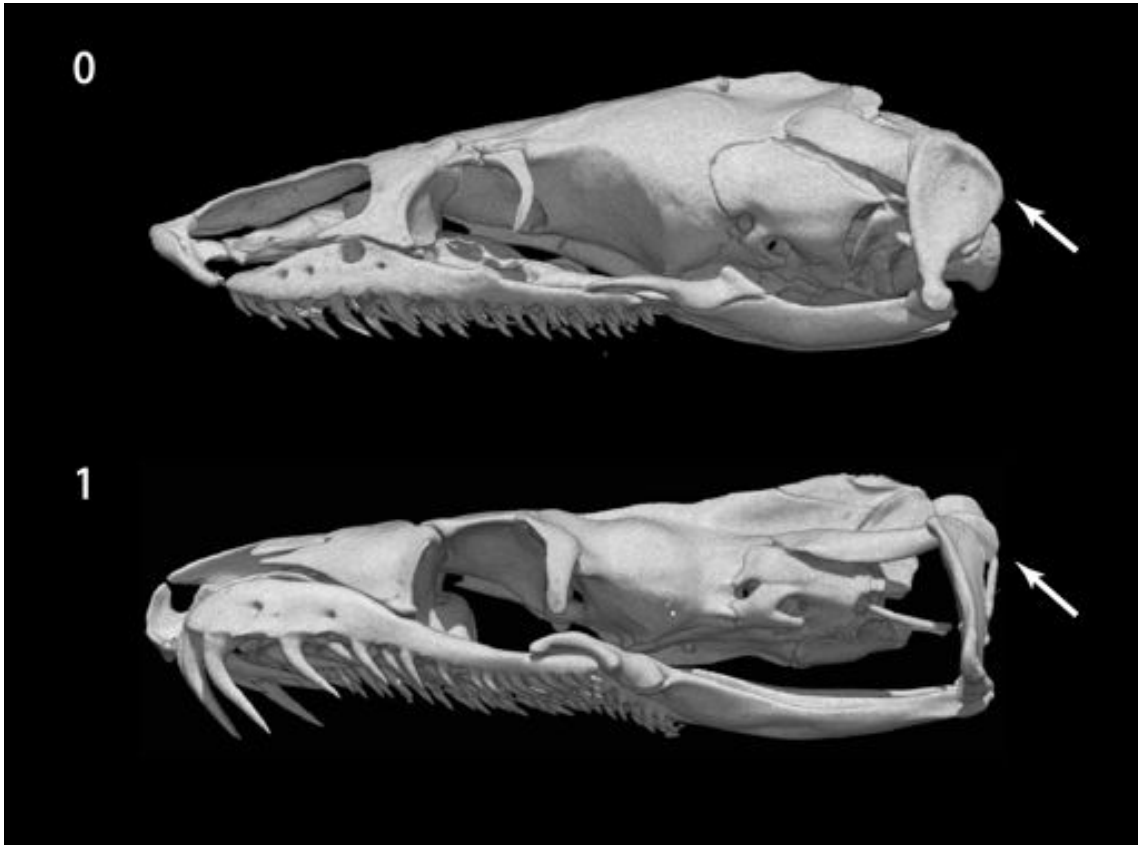

**Character 193, upturned supratemporal.** Downturned free caudal end of supratemporal (0) shown in *Loxocemus bicolor* (Loxocemidae); upturned supratemporal (1) shown in *Epicrates striatus* (Boinae).

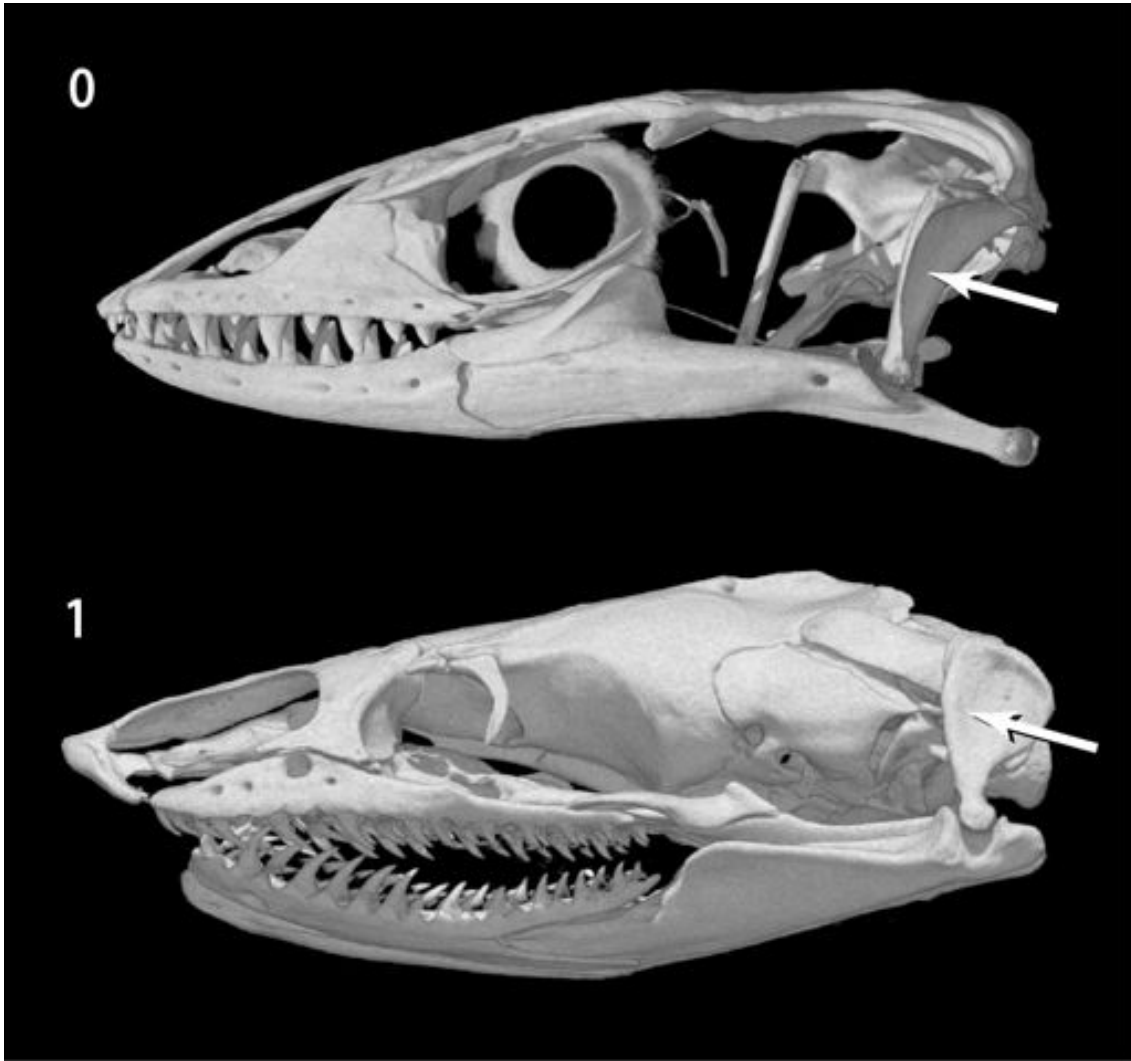

**Character 194, loss of lateral conch.** Quadrate with distinct lateral depression (0) shown in *Varanus acanthurus* (Varanidae); lateral conch lost (1) shown in *Loxocemus bicolor* (Loxocemidae).

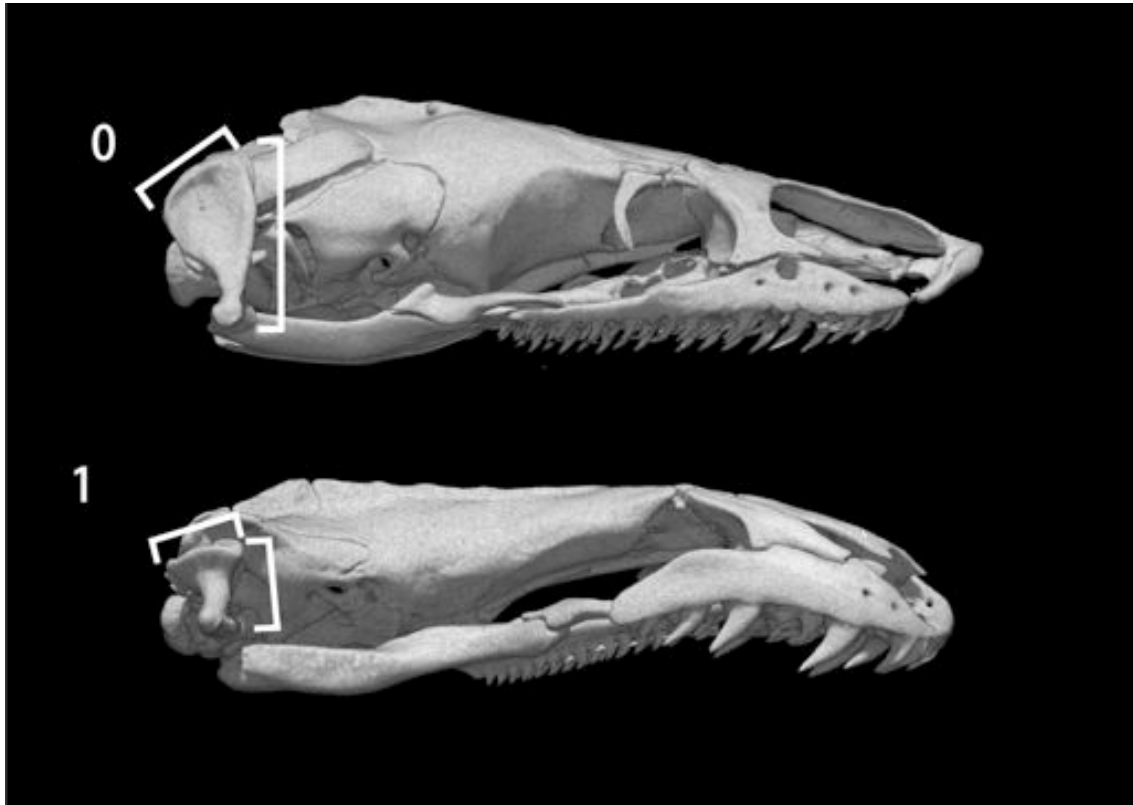

**Character 195, elongate quadrate.** Long quadrate shaft (0) shown in *Loxocemus bicolor* (Loxocemidae), short quadrate shaft (1) shown in *Anilius scytale* (Aniliidae).

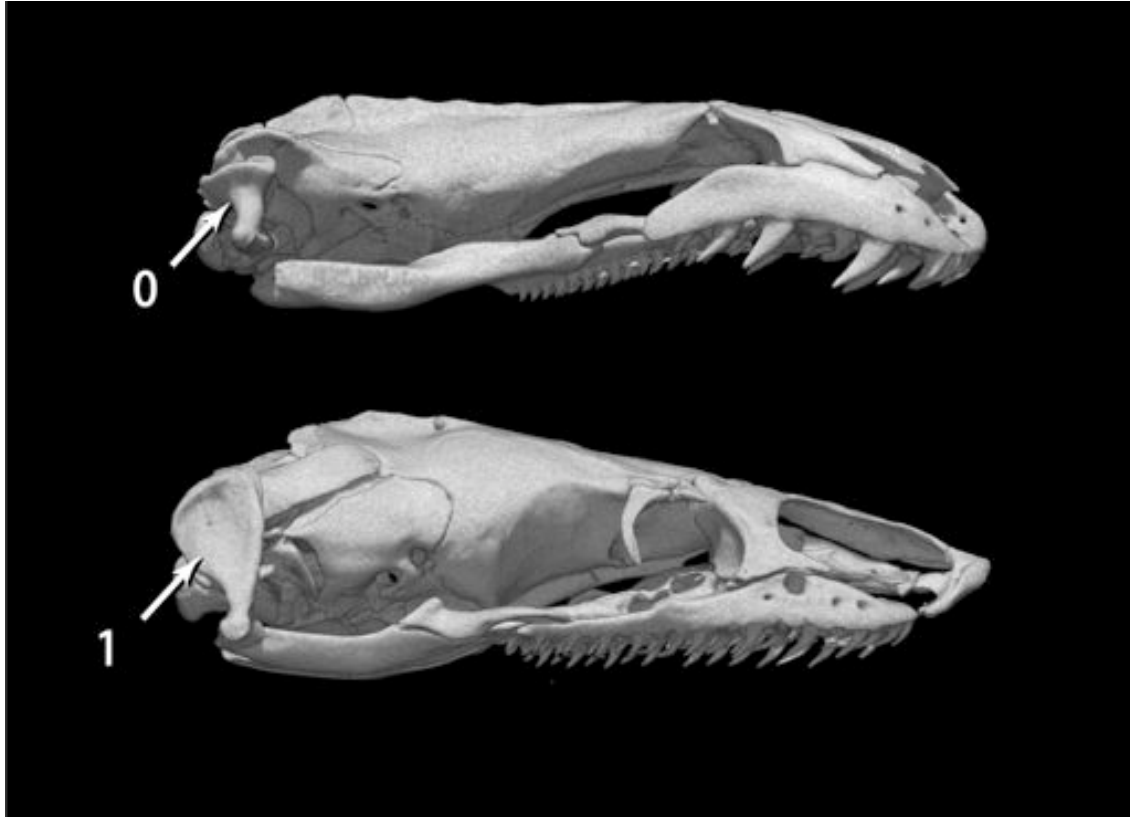

**Character 196, platelike quadrate head.** Massive quadrate head (0) shown in *Anilius scytale* (Aniliidae), broad, platelike quadrate head (1) shown in *Loxocemus bicolor* (Loxocemidae).



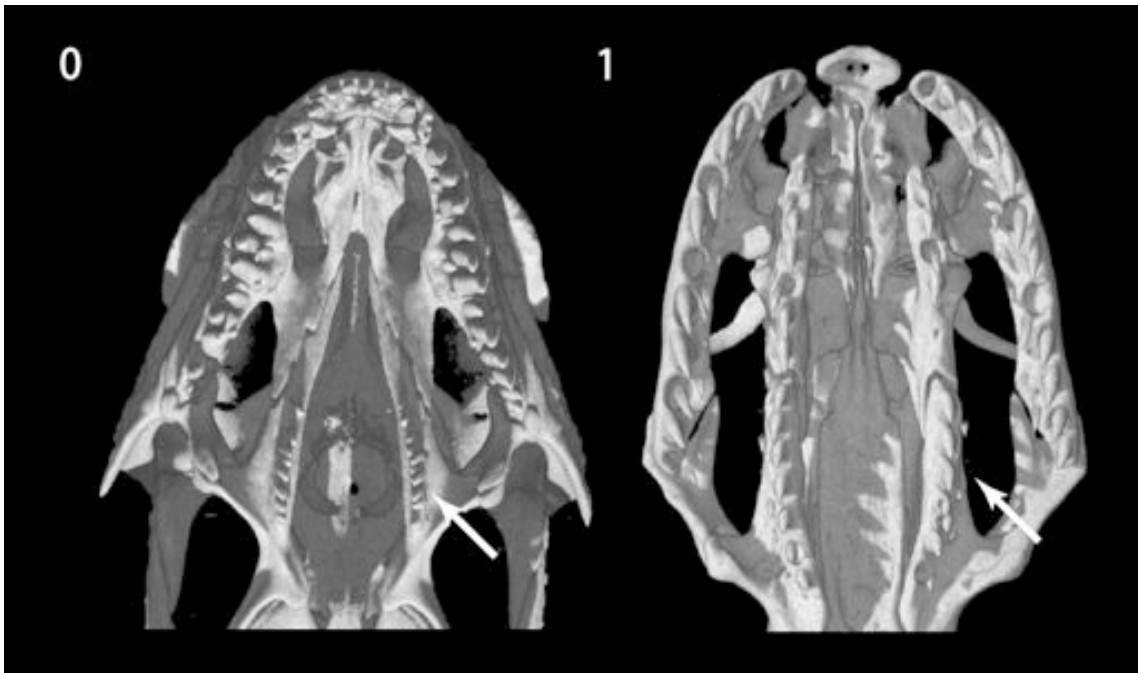

**Character 197, enlarged palatal teeth.** Small palatal teeth (0) shown in *Shinisaurus crocodilurus* (Xenosauridae); enlarged palatal teeth (1) shown in *Cyllindrophis maculatus* (Uropeltidae).

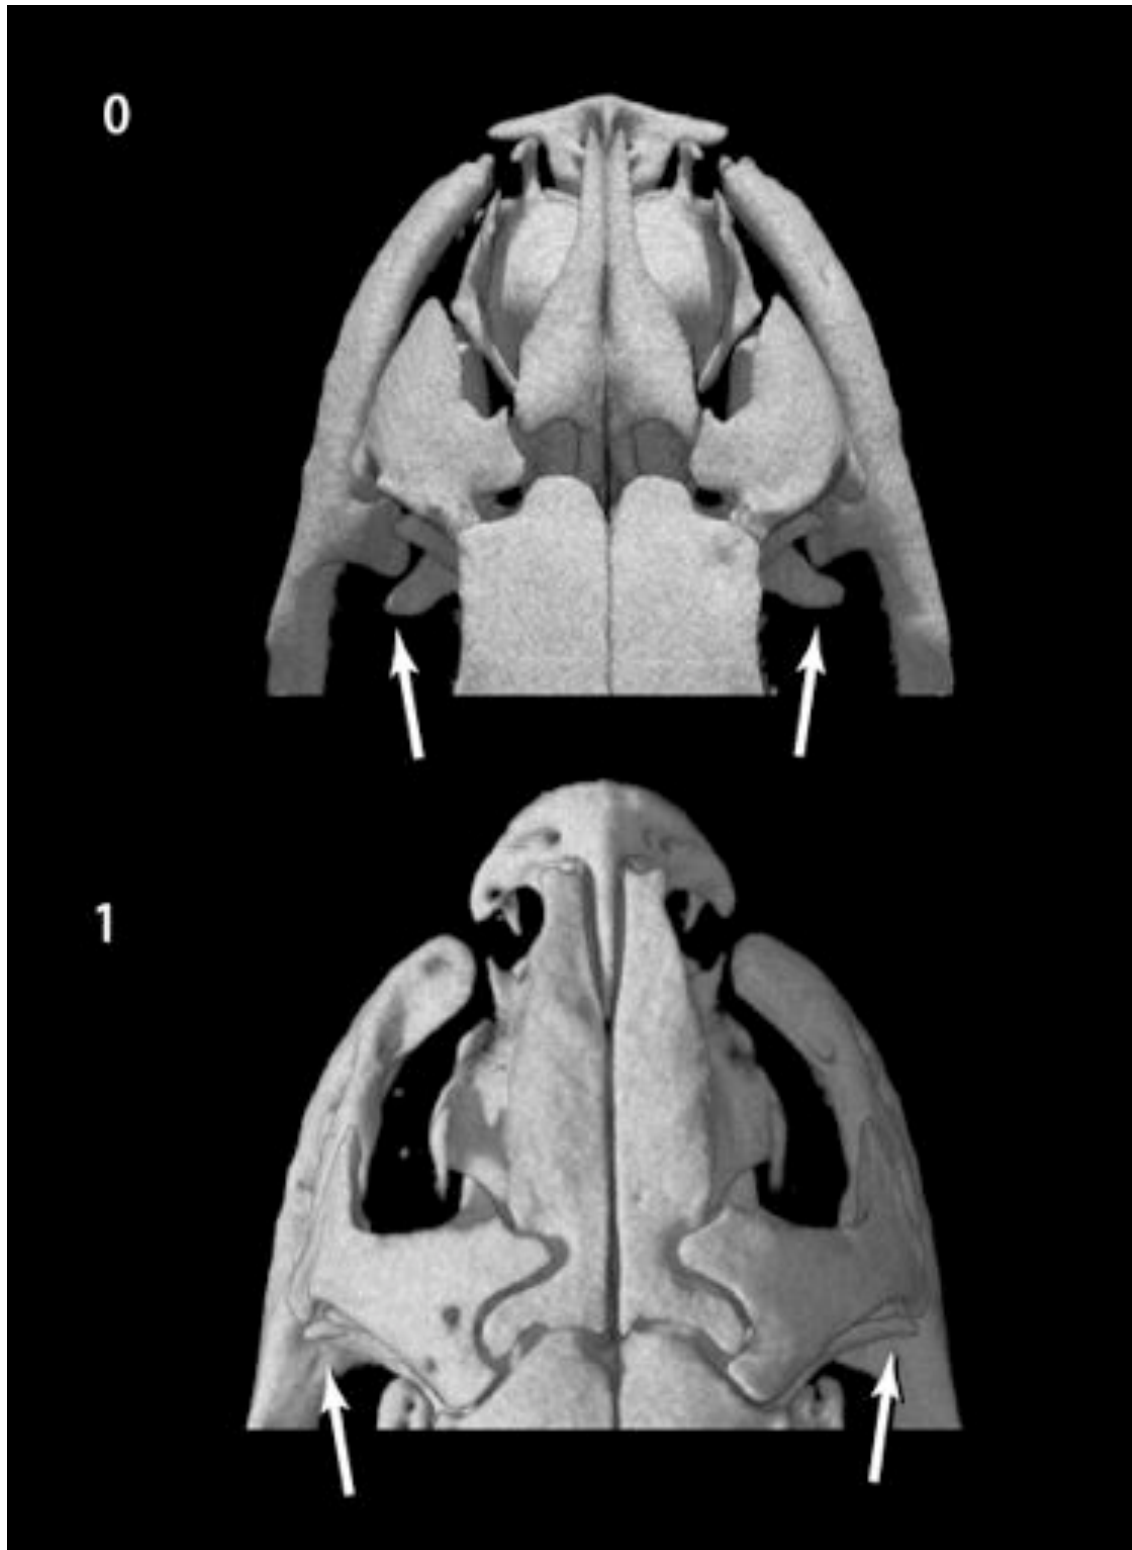

**Character 198, long maxillary process articulates with lateral margin of prefrontal.** Short maxillary process (0) shown in *Tropidophis haetianus* (Tropidophiidae); elongate maxillary process (1) shown in *Loxocemus bicolor* (Loxocemidae).

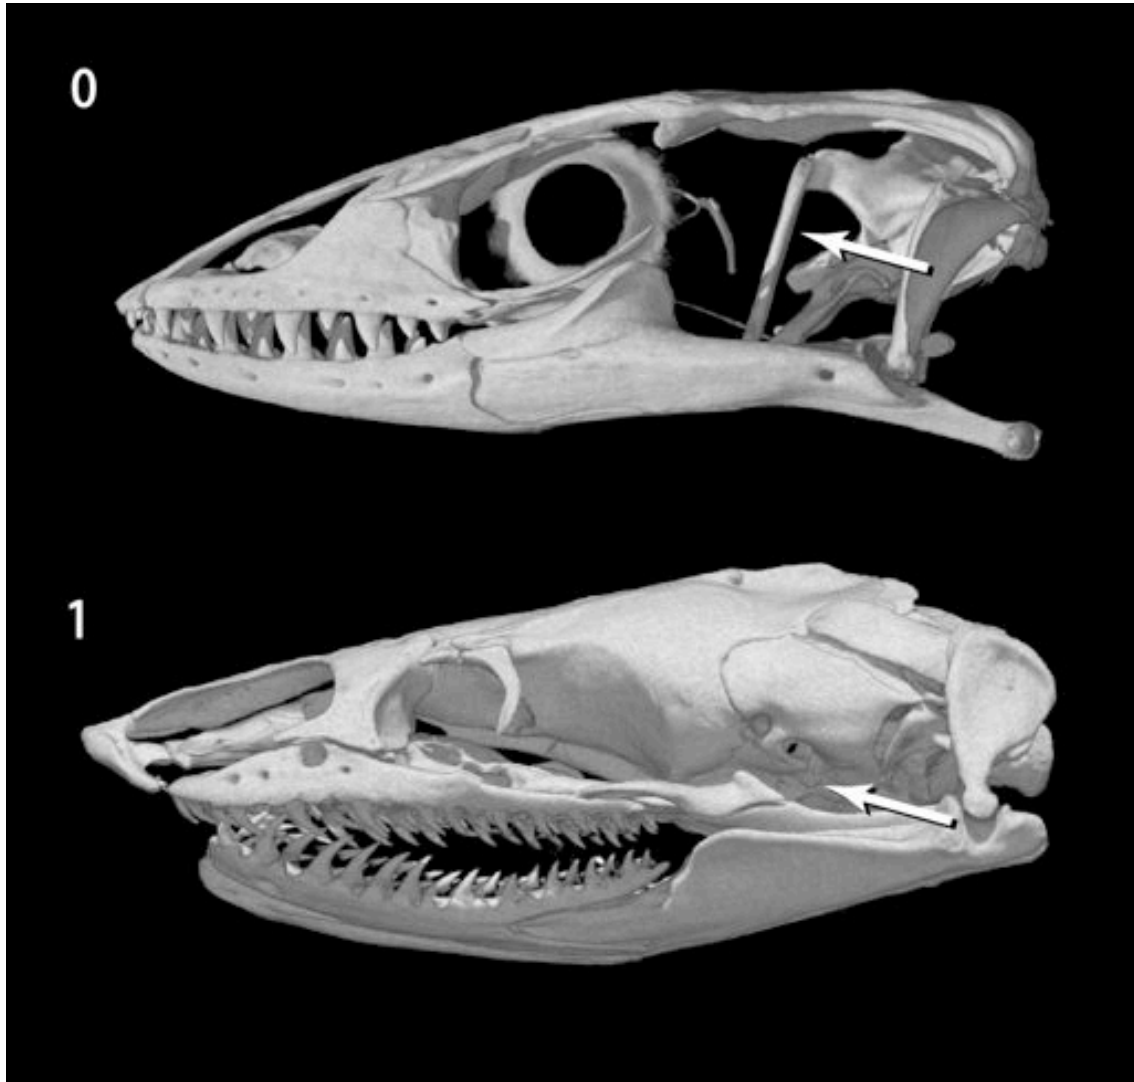

**Character 199, epipterygoid absent.** Epipterygoid present (0), or epipterygoid absent (1).

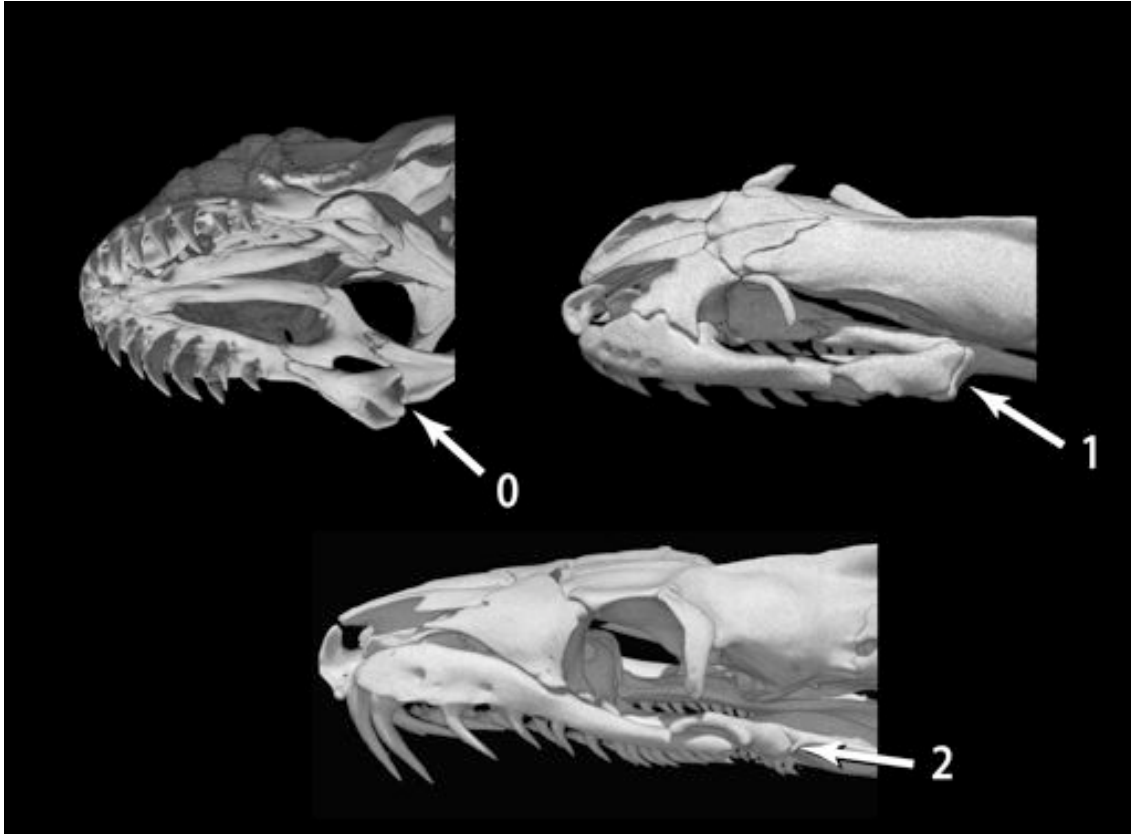

**Character 200, ectopterygoid overlap with pterygoid.** Ectopterygoid embracing pterygoid anteriorly (0) shown in *Heloderma horridum* (Helodermatidae); ectopterygoid overlapping pterygoid dorsally (1) shown in *Cylindrophis ruffus* (Uropeltidae); ectopterygoid abutting pterygoid laterally (2) shown in *Epicrates striatus* (Boinae).

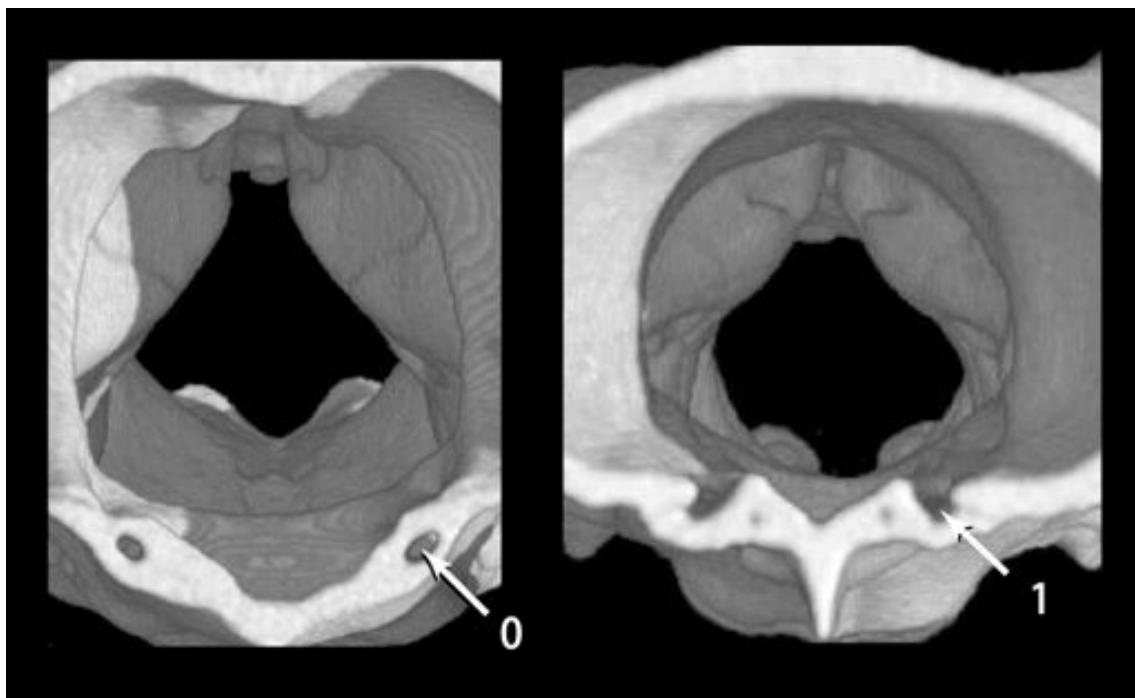

**Character 201, vidian canal opens intracranially.** Vidian canal enclosed by sphenoid (0) shown in *Loxocemus bicolor* (Loxocemidae); Vidian canal opens intracranially (1) shown in *Epicrates striatus* (Boinae).

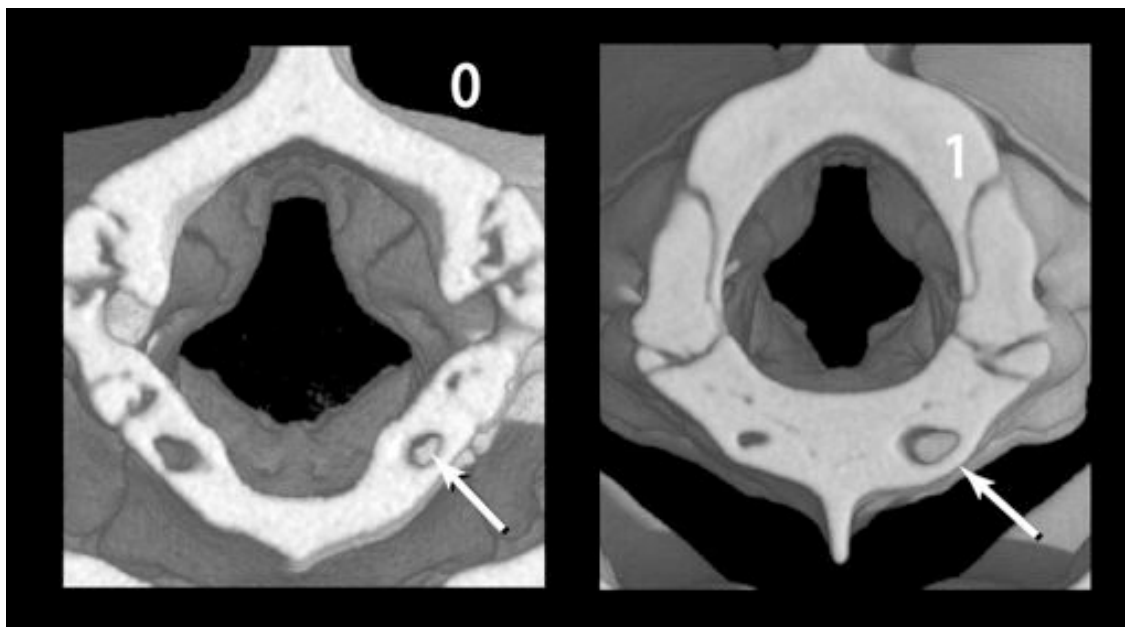

**Character 202, vidian canals asymmetrical.** Vidian canals symmetrical (0) shown in *Anilius scytale* (Aniliidae) ; Vidian canals with asymmetrical posterior openings (1) shown in *Python molurus* (Pythoninae).

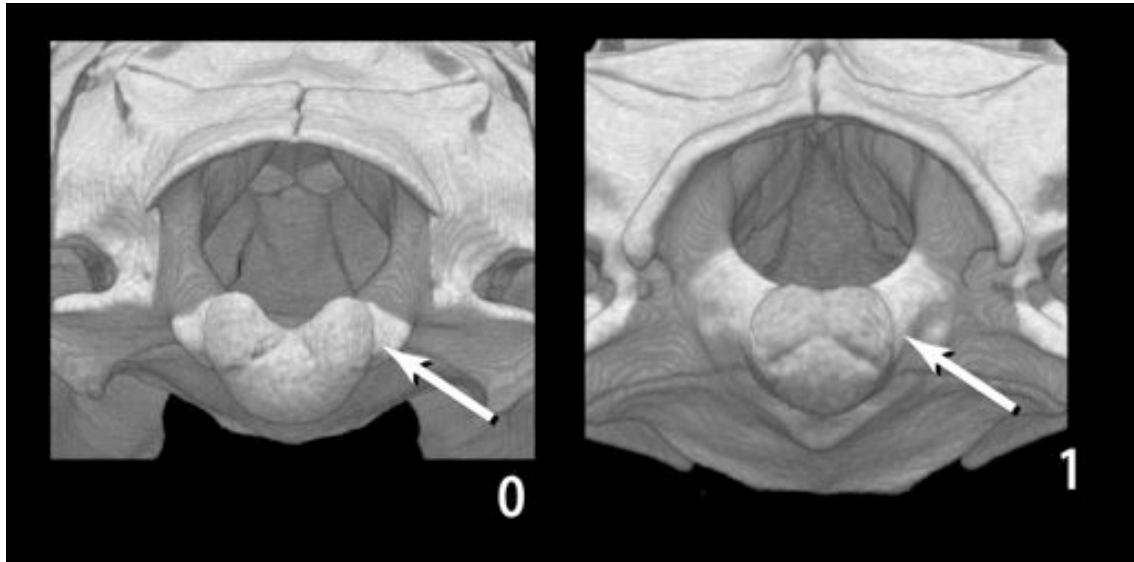

**Character 203, exoccipitals contact ventrally.** Exoccipitals separated (0) shown in *Loxocemus bicolor* (Loxocemidae) ; Exoccipitals contact (1) shown in *Cylindrophis ruffus* (Uropeltidae).

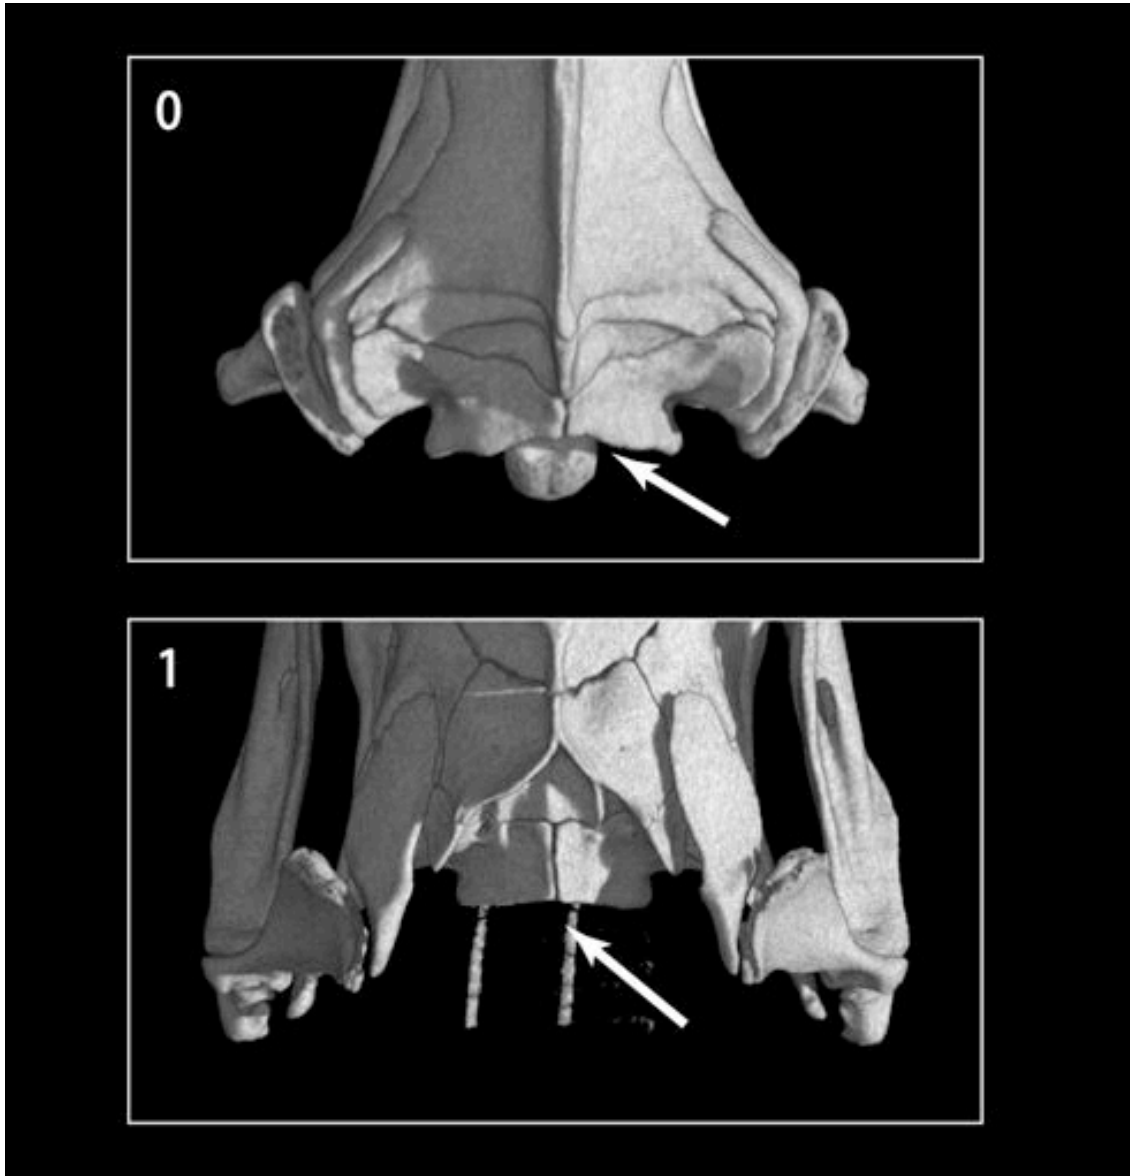

**Character 205, otoccipital crest.** Otoccipitals do not obscure occipital condyle (0) shown in *Cylindrophis ruffus* (Uropeltidae), otoccipitals projecting posteriorly to cover occipital condyle in dorsal view (1) shown in *Tropidophis haetianus* (Tropidophiidae).

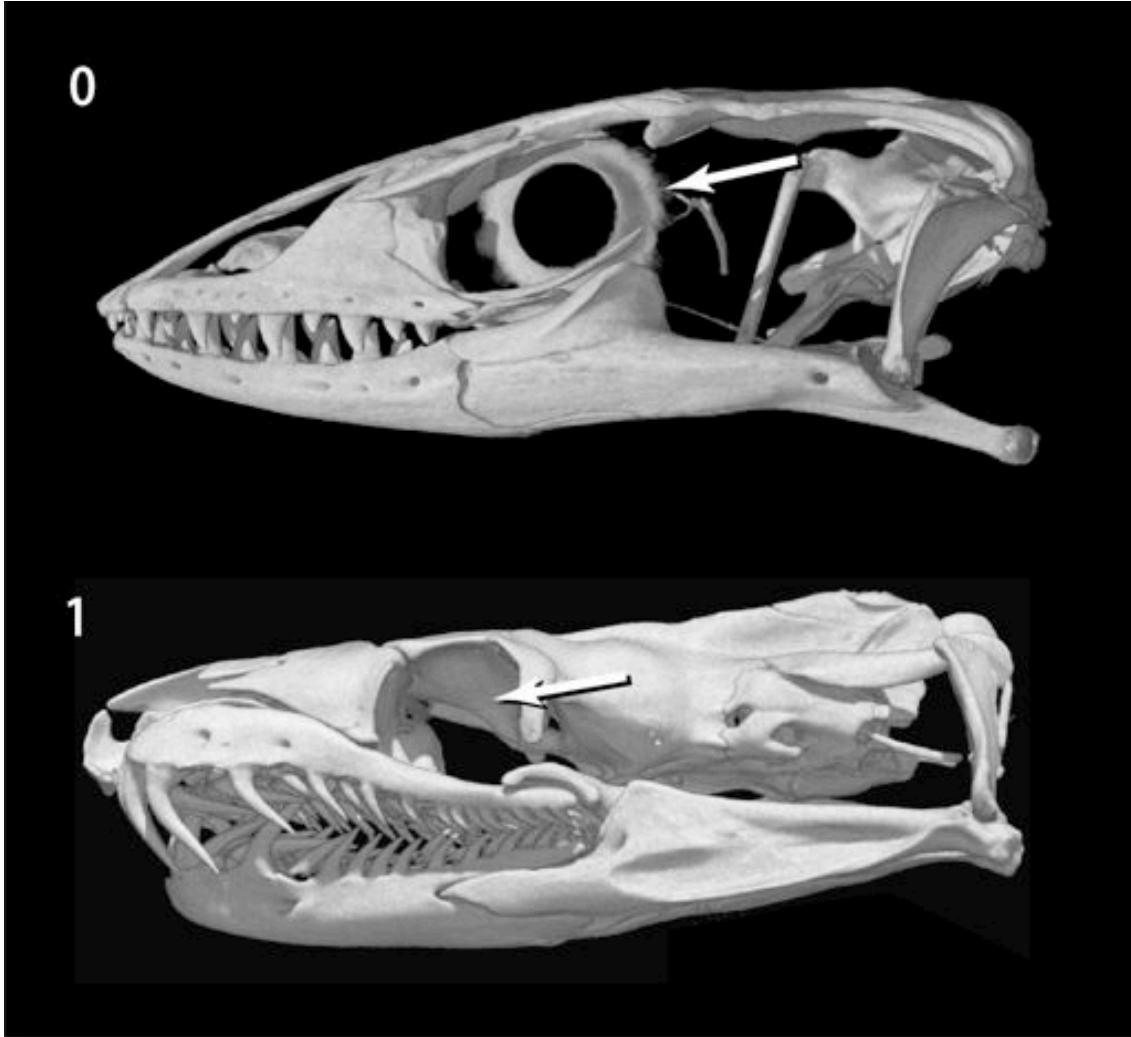

**Character 206, loss of sclerotic ring.** Sclerotic ring present (0) shown in *Varanus acanthurus* (Varanidae); Sclerotic ring absent (1) shown in *Epicrates striatus* (Boinae).



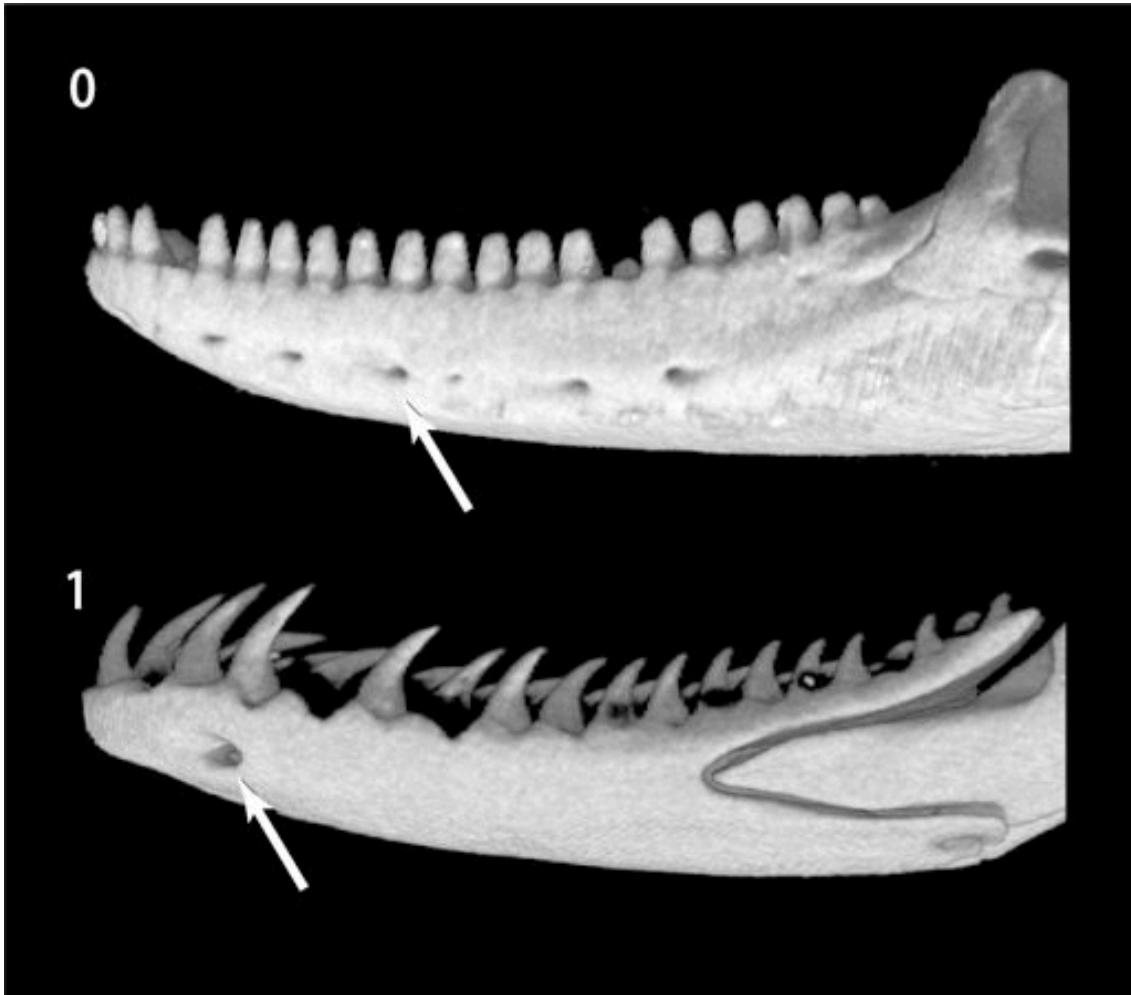

**Character 207, enlarged mental foramen.** Small mental foramina (0) shown in *Xenosaurus grandis* (Xenosauridae); enlarged mental foramen (1) shown in *Loxocemus xenopeltis* (Loxocemidae).

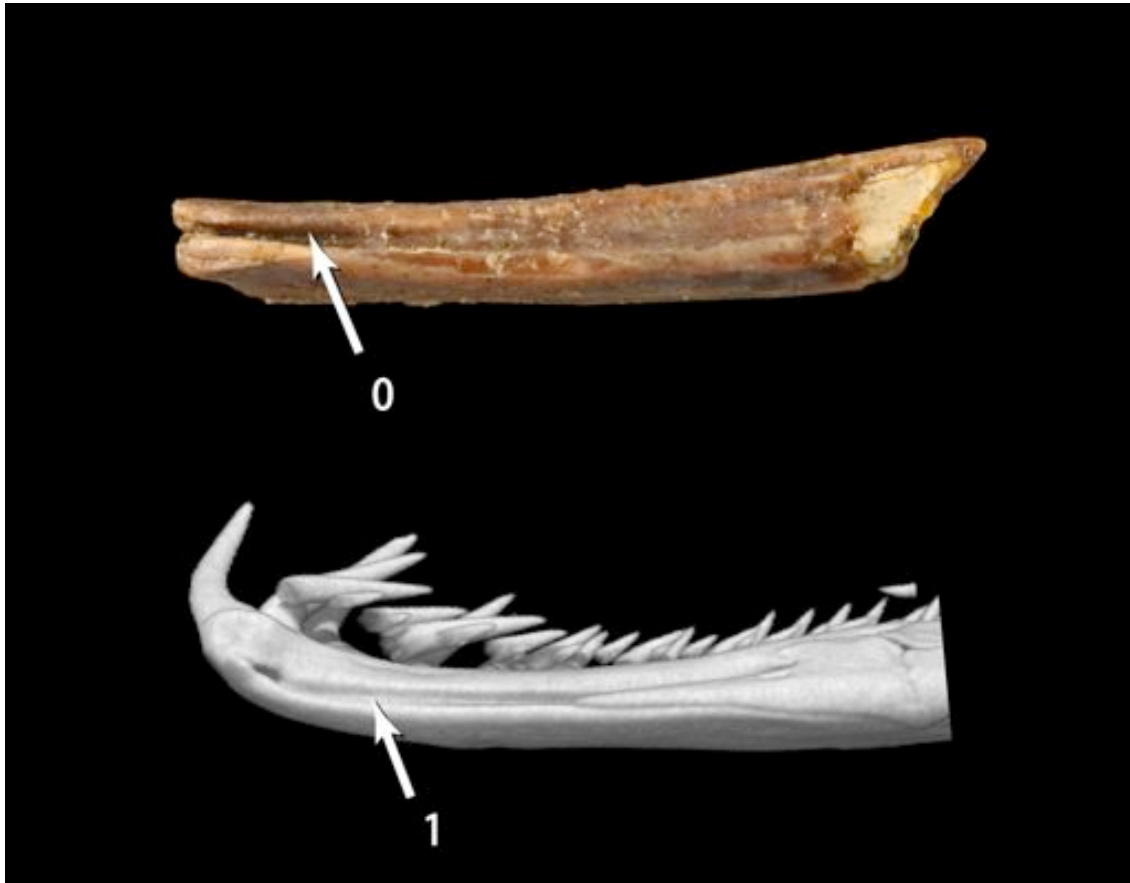

**Character 208, Shallow Meckelian groove.** Deep Meckelian groove at tip of jaw (0) shown in *Coniophis precedens*, right dentary in ventral view; shallow Meckelian groove (1) shown in *Epicrates striatus* (Boinae), dentary in ventromedial view.

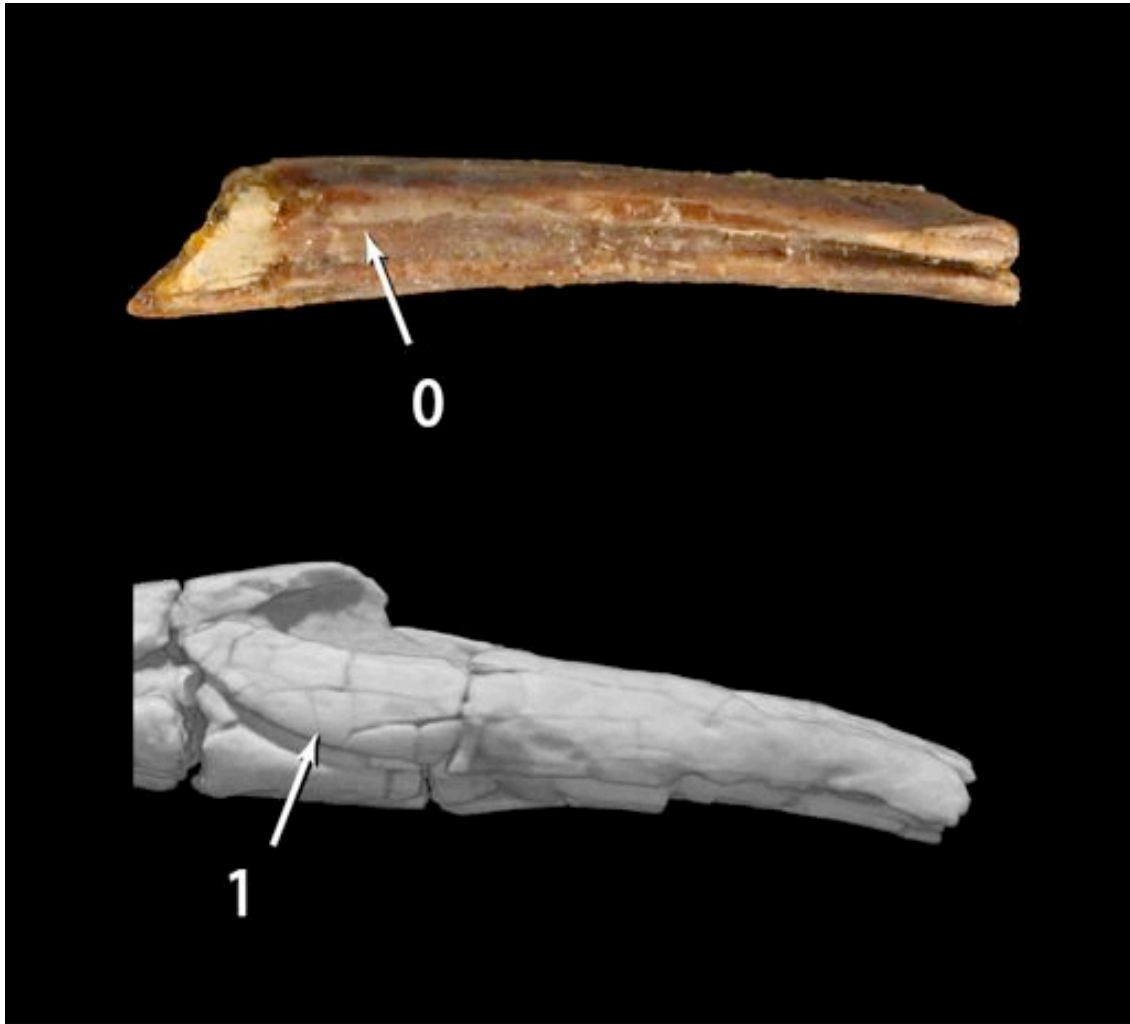

**Character 209, Orientation of posteroventral margin of dentary.** Angular process of dentary does not wrap beneath dentary (0) shown in *Coniophis precedens*, right dentary in ventral view; angular process wrapping beneath dentary (1) shown in *Dinilysia patagonica* right dentary in ventromedial view.

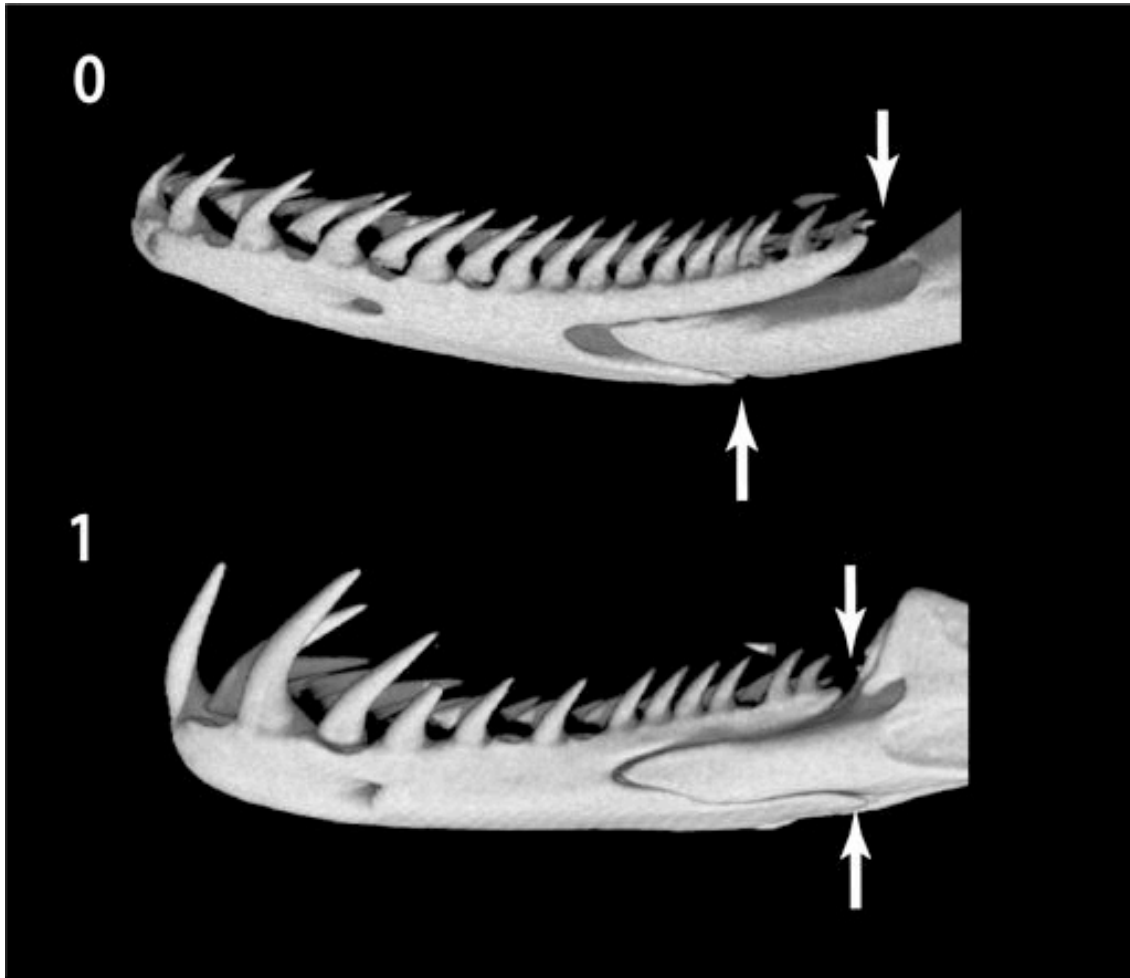

**Character 210, elongate angular process.** Angular process of dentary short (0) shown in *Tropidophis haetianus* (Tropidophiidae); angular process extends to back of dentary (1) shown in *Epicrates striatus* (Boinae).

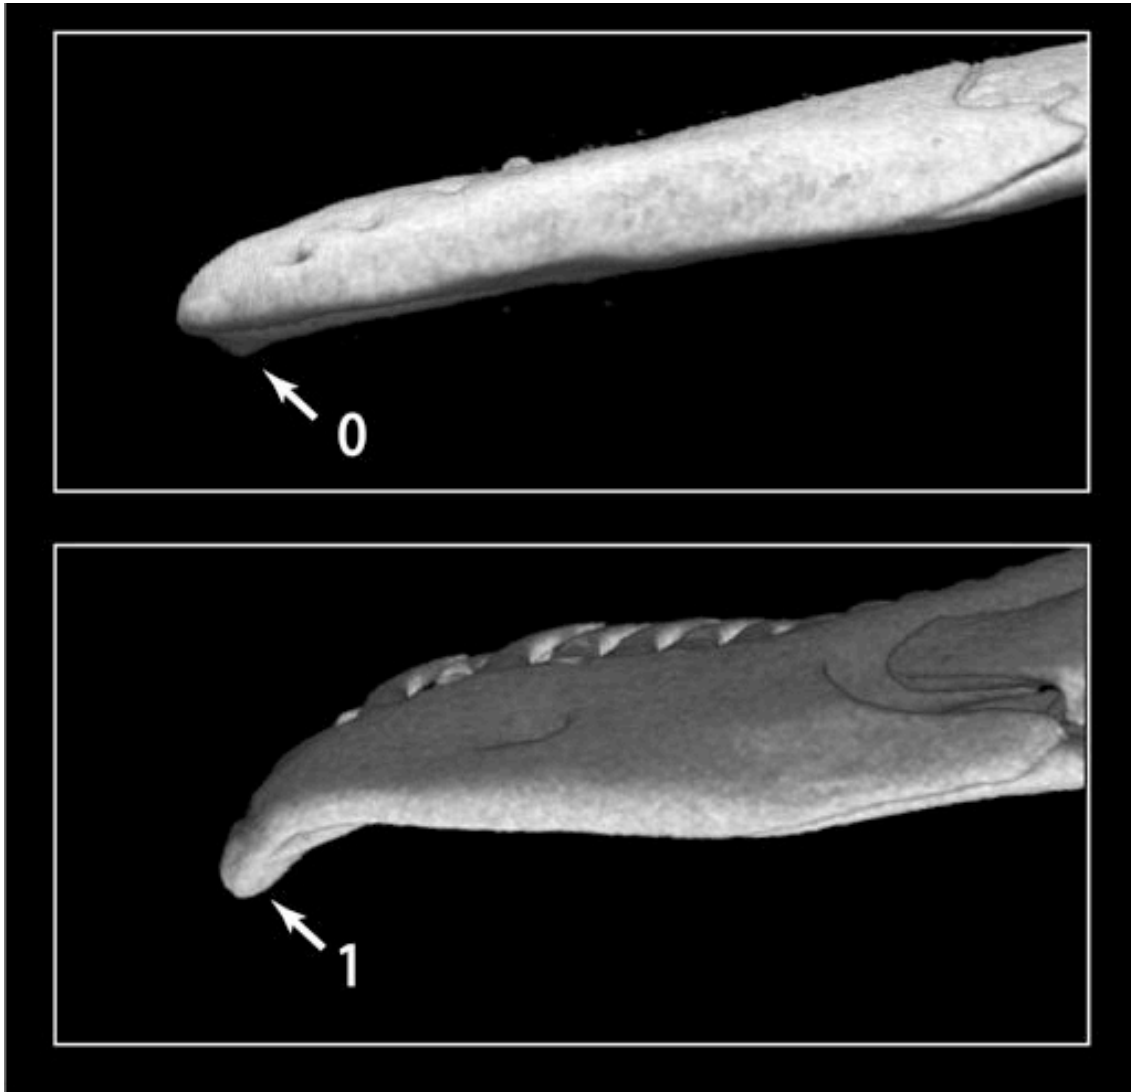

**Character 211, medially projecting symphysis.** Symphysis does not strongly project medially (0) shown in *Shinisaurus crocodilurus* (Xenosauridae); strong medial projection of symphysis (1) shown in *Tropidophis haetianus* (Tropidophiidae).

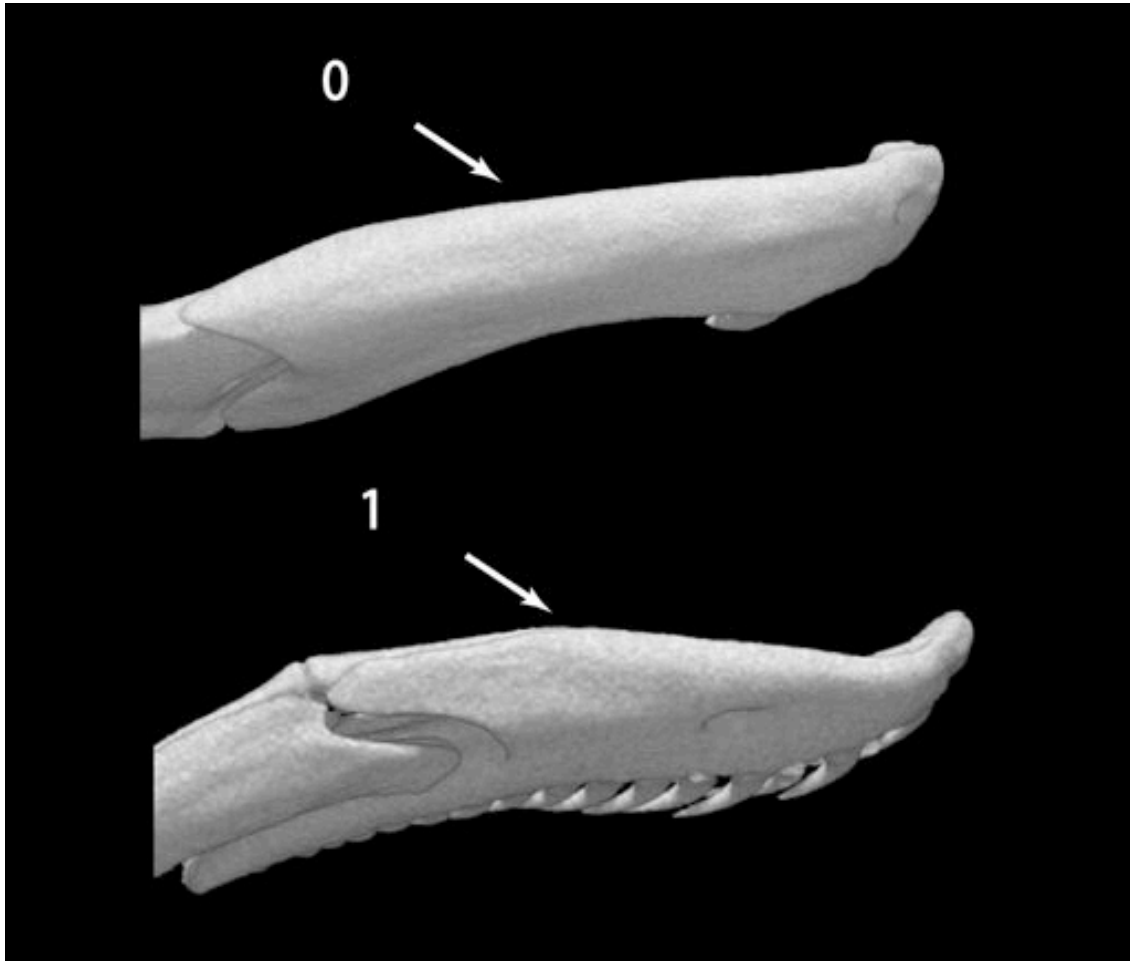

**Character 212, medioventral flange of dentary.** Absence of medial flange (0) shown in *Anilius scytale*; medially projecting, crescentic flange (1) shown in *Tropidophis haetianus*.

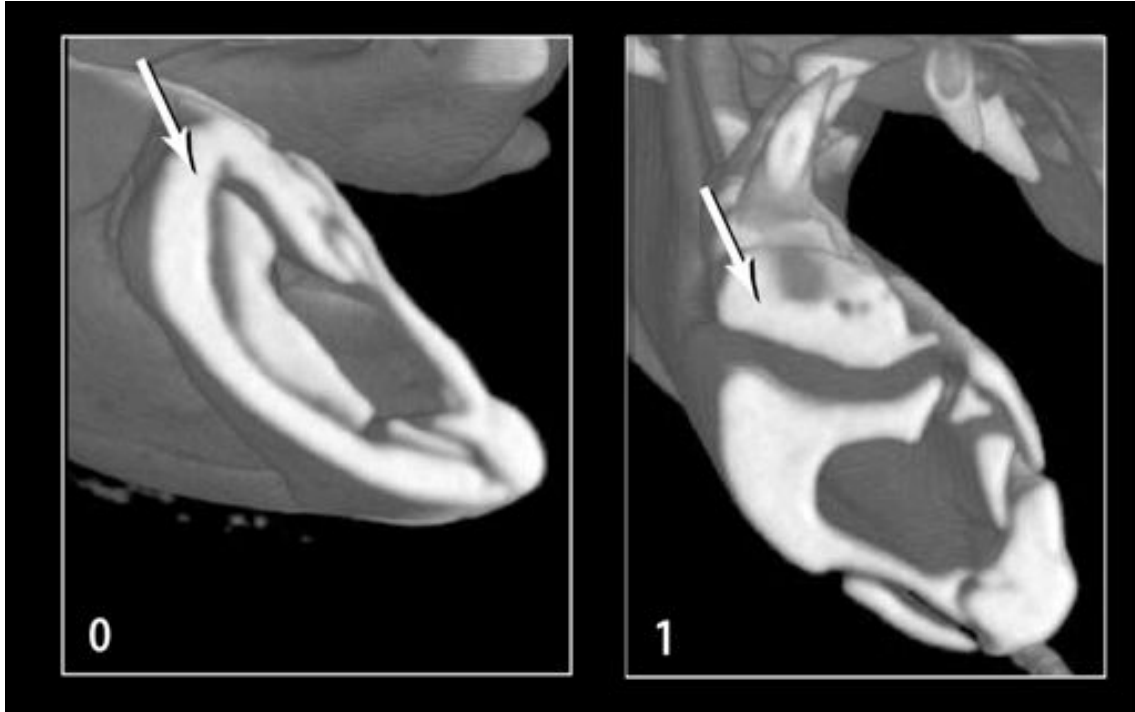

**Character 213, dentary overlies surangular.** Posterodorsal process of dentary embraces surangular (0) shown in *Varanus exanthematicus* (Varanidae); posterodorsal process overlies surangular (1) shown in *Python molurus* (Pythoninae).

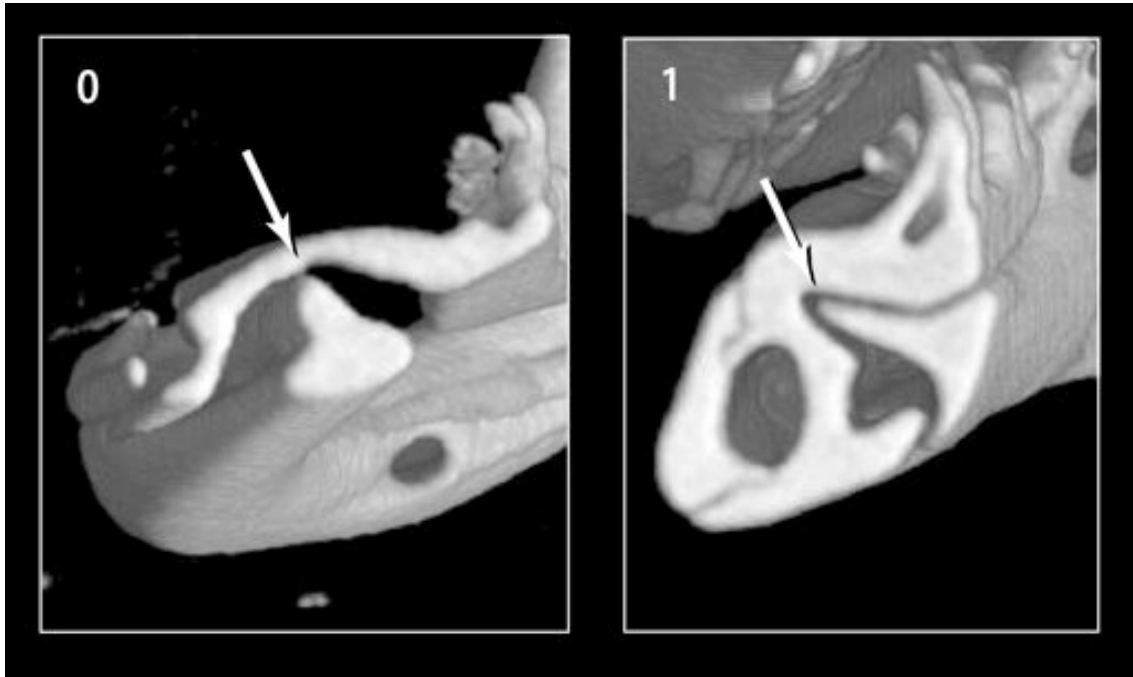

**Character 214, dentary subdental slot.** Surangular does not insert beneath subdental shelf (0), shown in a coronal section of *Xenopeltis unicolor* (Xenopeltidae); surangular inserts into a distinct slot beneath the subdental shelf (1) shown in *Epicrates striatus* (Boinae).



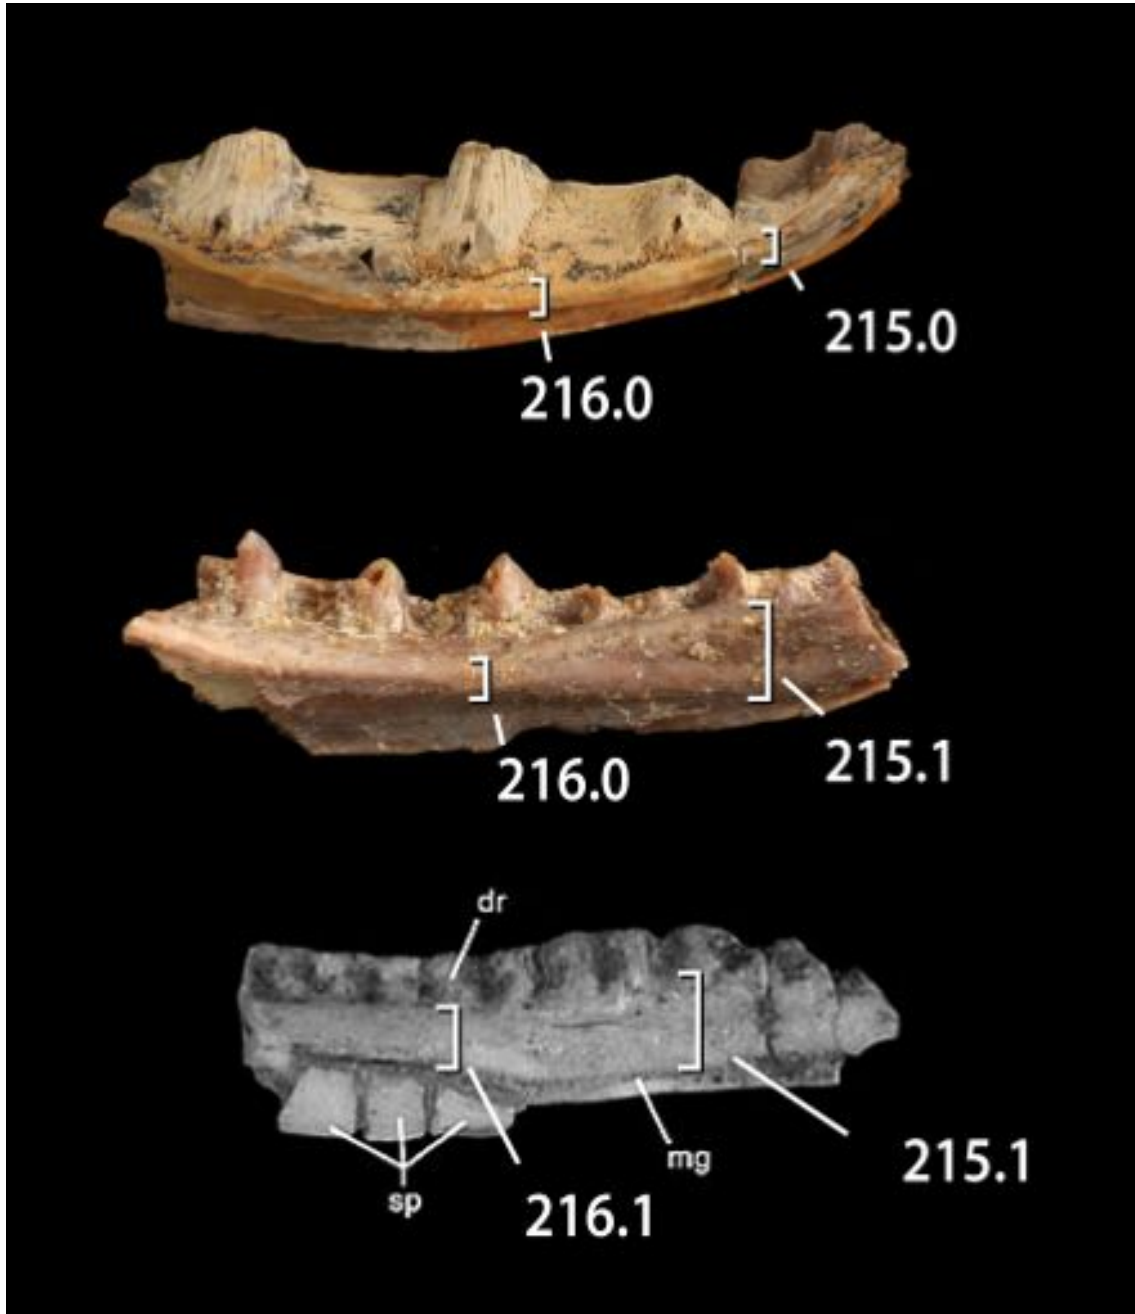

**Character 215 and 216, dentary submental ridge.** Top, *Palaeosaniwa cf. canadensis* (Platynota); middle, *Coniophis precedens*; bottom, *Najash rionegrina* (from Zaher et al. 2009).

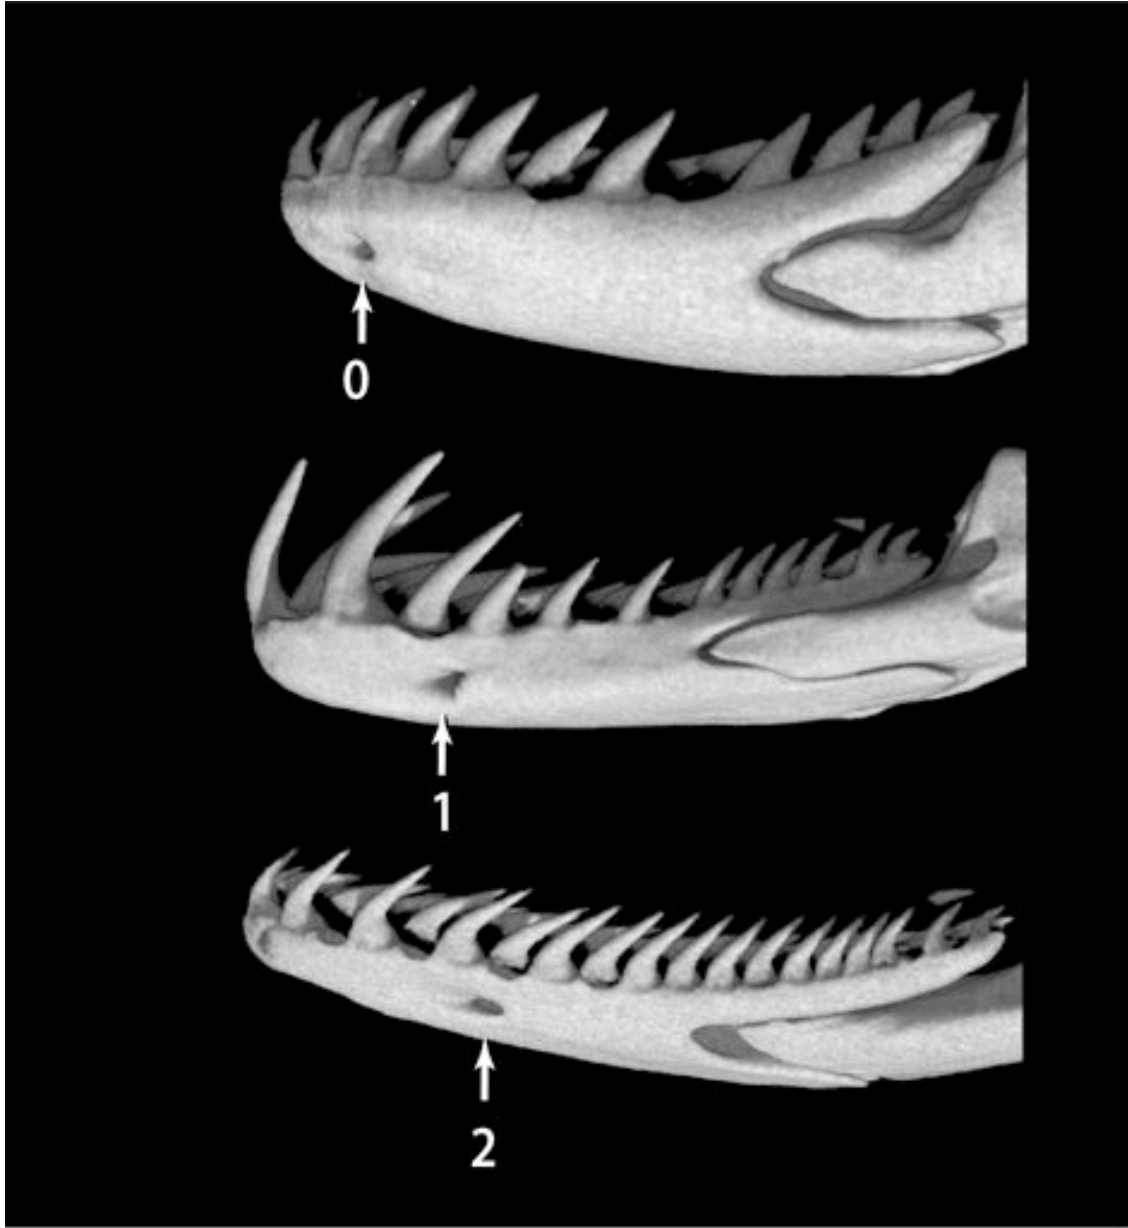

**Character 217, position of enlarged mental foramen.** Distally placed mental foramen (0) in *Cylindrophis ruffus* (Uropeltidae); posteriorly displaced mental foramen (1) in *Epicrates striatus* (Boinae); mental foramen located halfway between symphysis and surangular notch (2) in *Tropidophis haetianus* (Tropidophiidae).

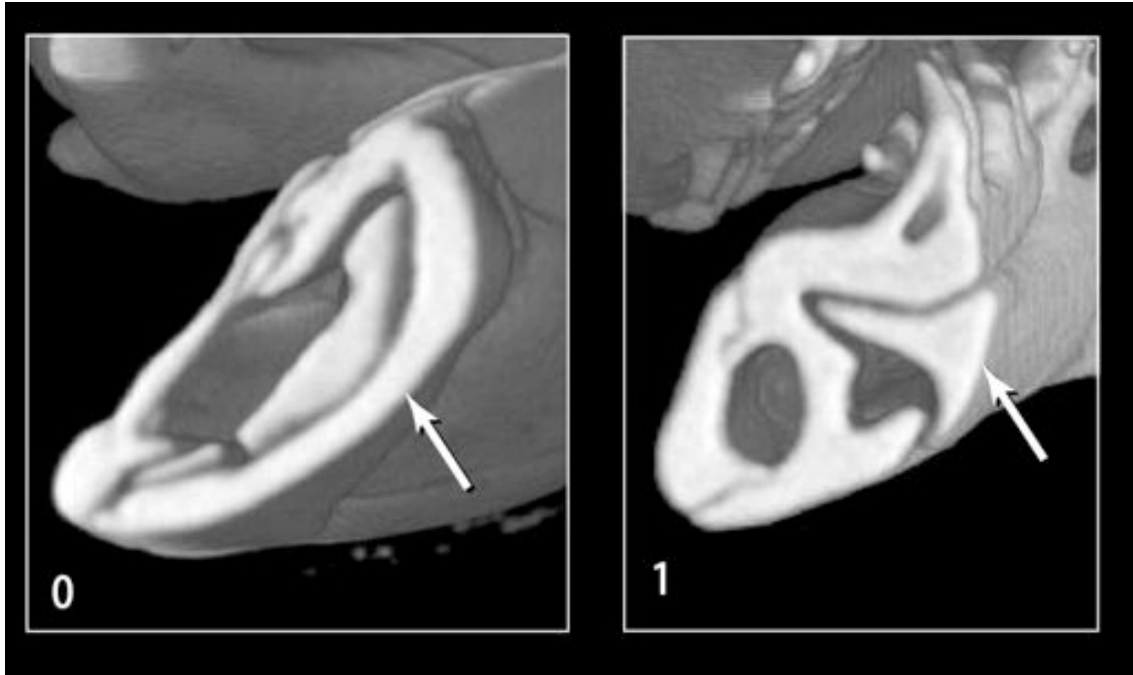

**Character 218, triradiate anterior process of surangular.** Surangular with a blade-like anterior process (0) shown in *Varanus exanthematicus* (Varanidae); surangular with a triradiate anterior process (1) shown in *Epicrates striatus* (Boinae).

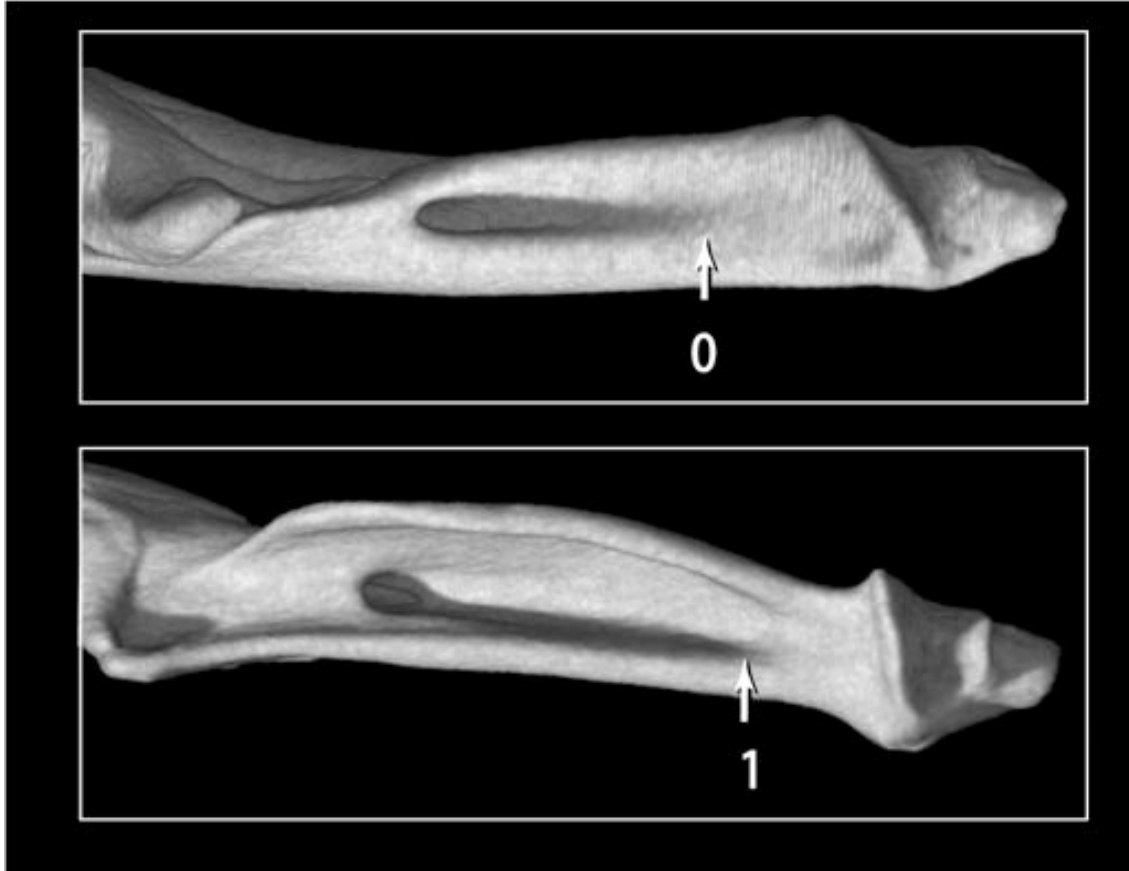

**Character 219, posterior extension of adductor fossa.** Limited caudal extension of adductor fossa (0) in *Cylindrophis ruffus* (Uropeltidae); caudal extension of the adductor fossa (1) in *Epicrates striatus* (Boinae).

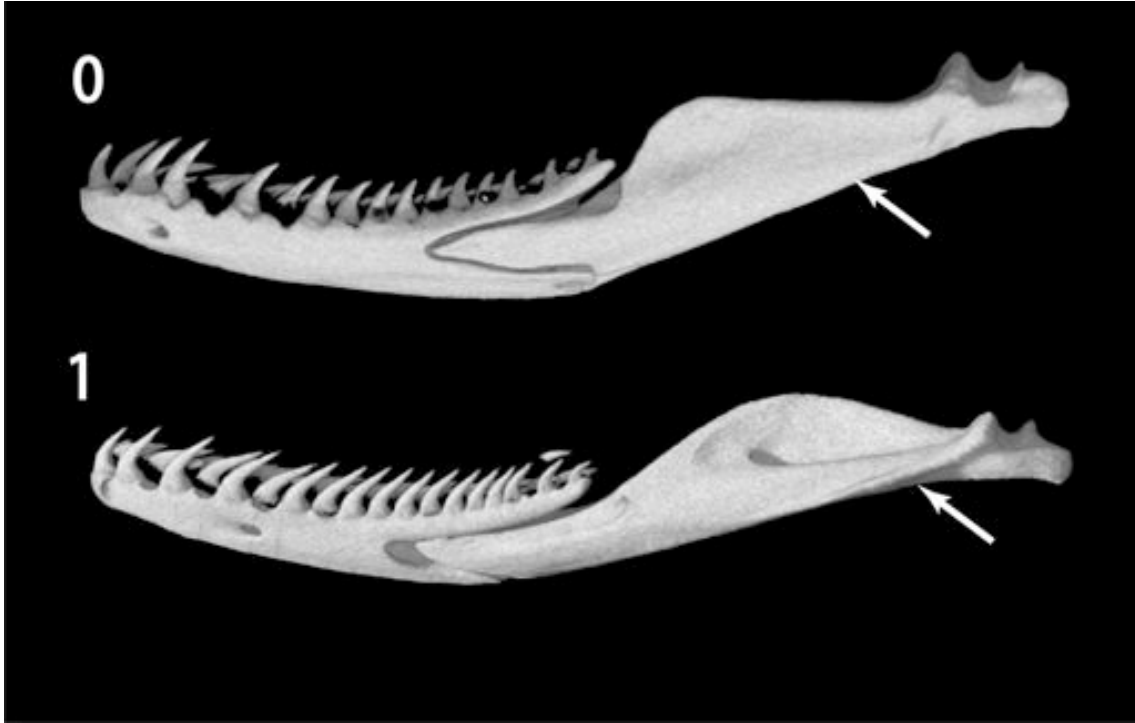

**Character 220, posteroventral crest of surangular.** Posteroventral surface of mandible smooth (0) shown in *Loxocemus bicolor* (Loxocemidae); posteroventral surface of mandible bearing a distinct crest (1) shown in *Tropidophis haetianus* (Tropidophiidae).

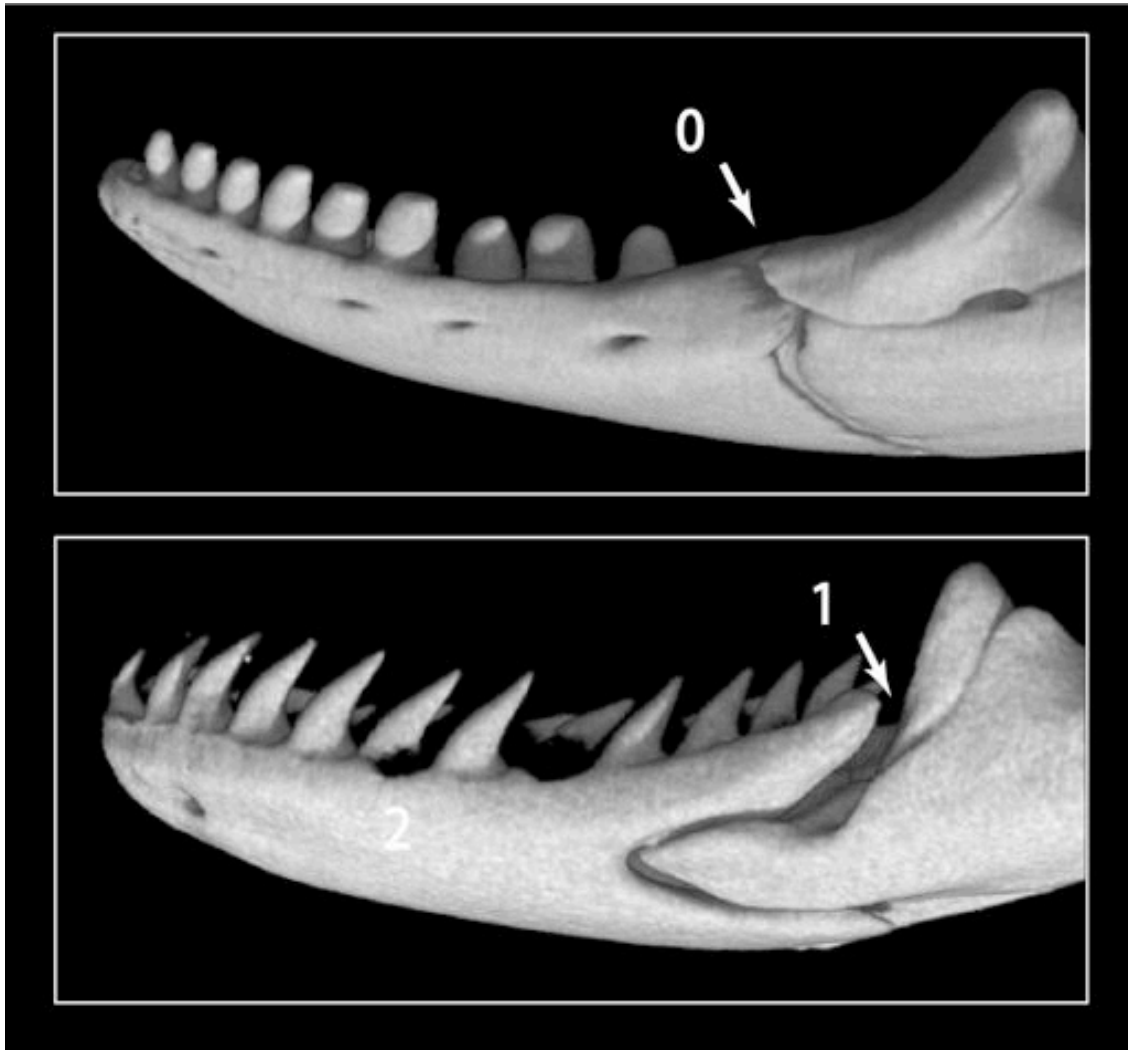

**Character 221, coronoid does not overlap dentary laterally.** Lateral overlap of coronoid onto the dentary (0) in *Varanus exanthematicus* (Varanidae); loss of lateral overlap (1) in *Cylindrophis ruffus* (Uropeltidae).

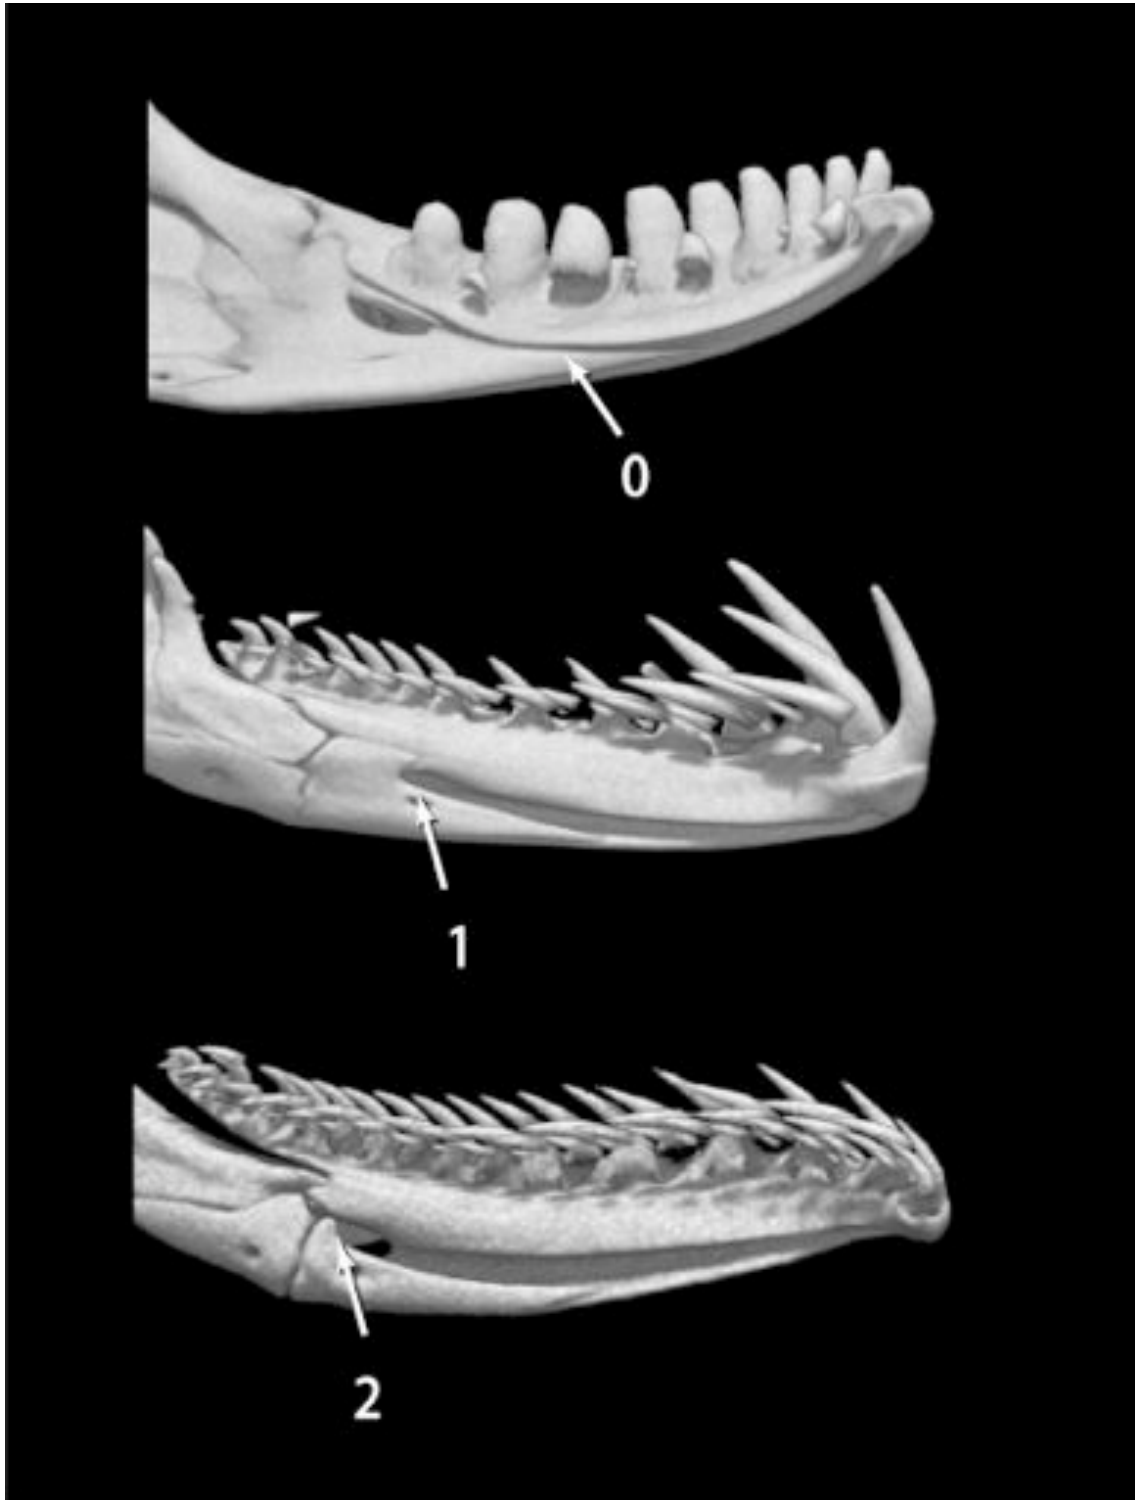

**Character 222, splenial contact with subdental ridge reduced.** Extensive contact of splenial with subdental ridge (0) shown in *Varanus exanthematicus* (Varanidae), splenial contacting subdental ridge posteriorly (1) shown in *Epicrates striatus* (Boinae), reduced articulation (2) shown in *Trophidophis haetianus* (Tropidophiidae).

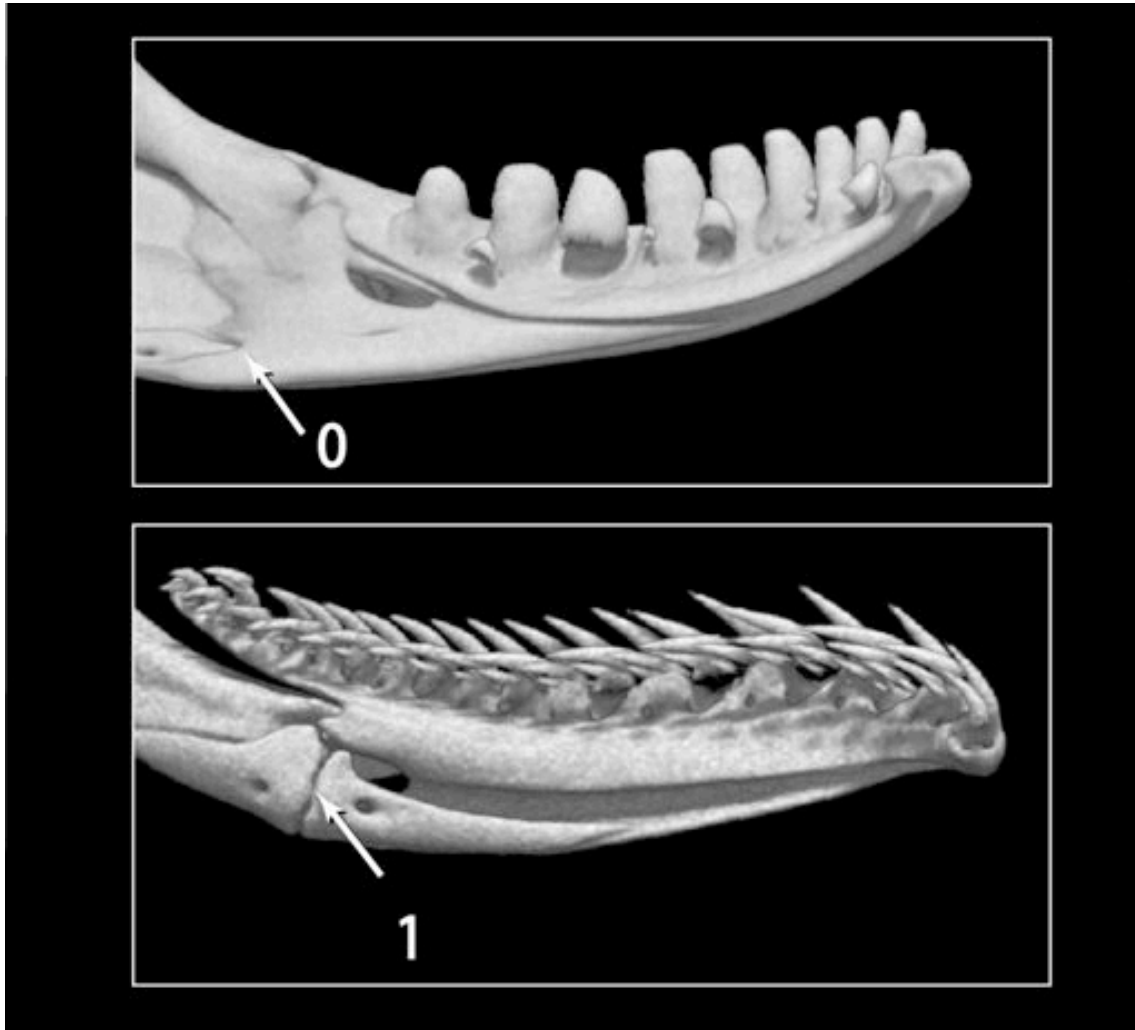

**Character 223, splenial-angular hinge.** Overlap of splenial onto angular (0) shown in *Varanus exanthematicus* (Varanidae), hinge between splenial and angular (1) shown in *Tropidophis haetianus* (Tropidophiidae).



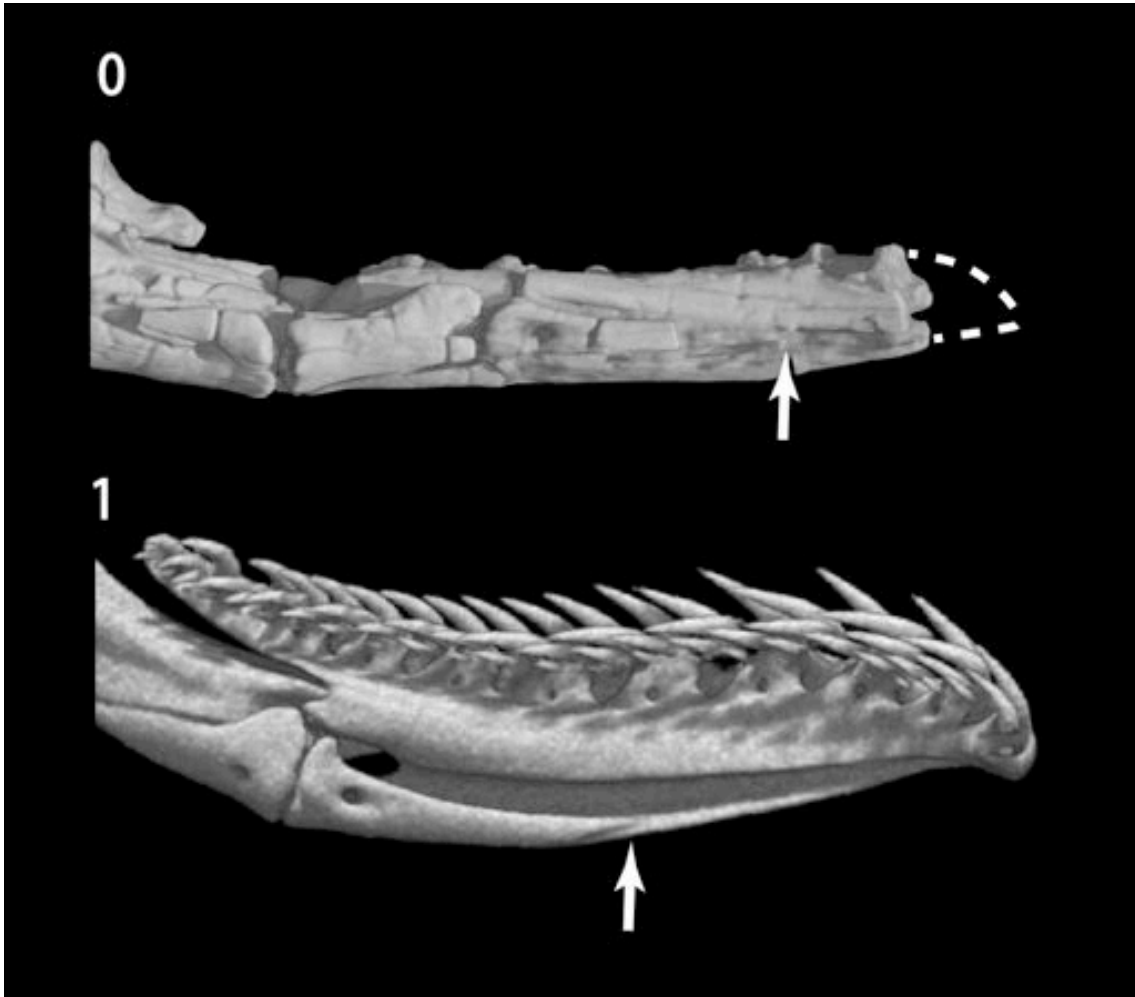

**Character 224, shortened splenial.** Elongate splenial (0) shown in *Dinilysia patagonica*; short splenial (1) shown in *Tropidophis haetianus* (Tropidophiidae).

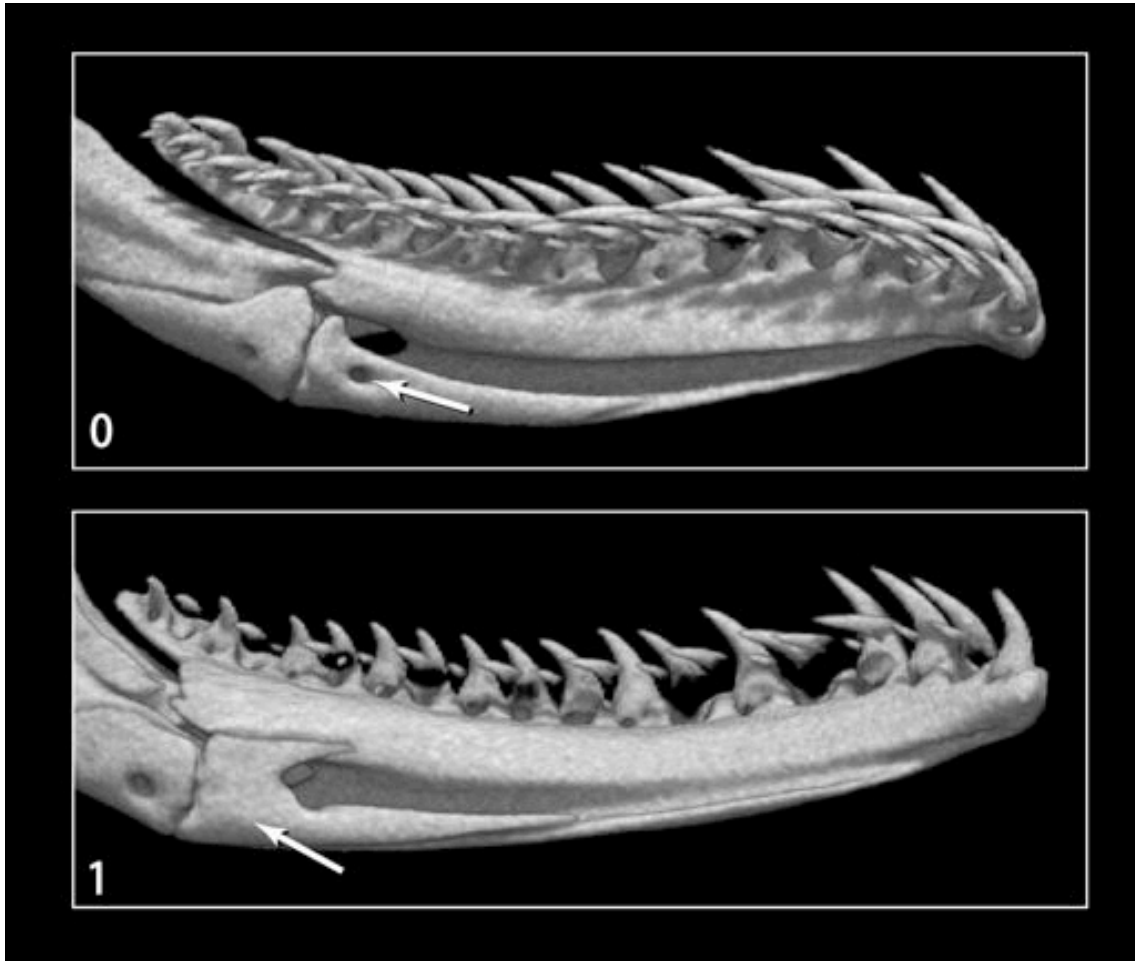

**Character 225, loss of anterior mylohyoid foramen.** Anterior mylohyoid foramen (0) shown in *Tropidophis haetianus* (Tropidophiidae), loss of foramen (1) shown in *Loxocemus bicolor* (Loxocemidae).

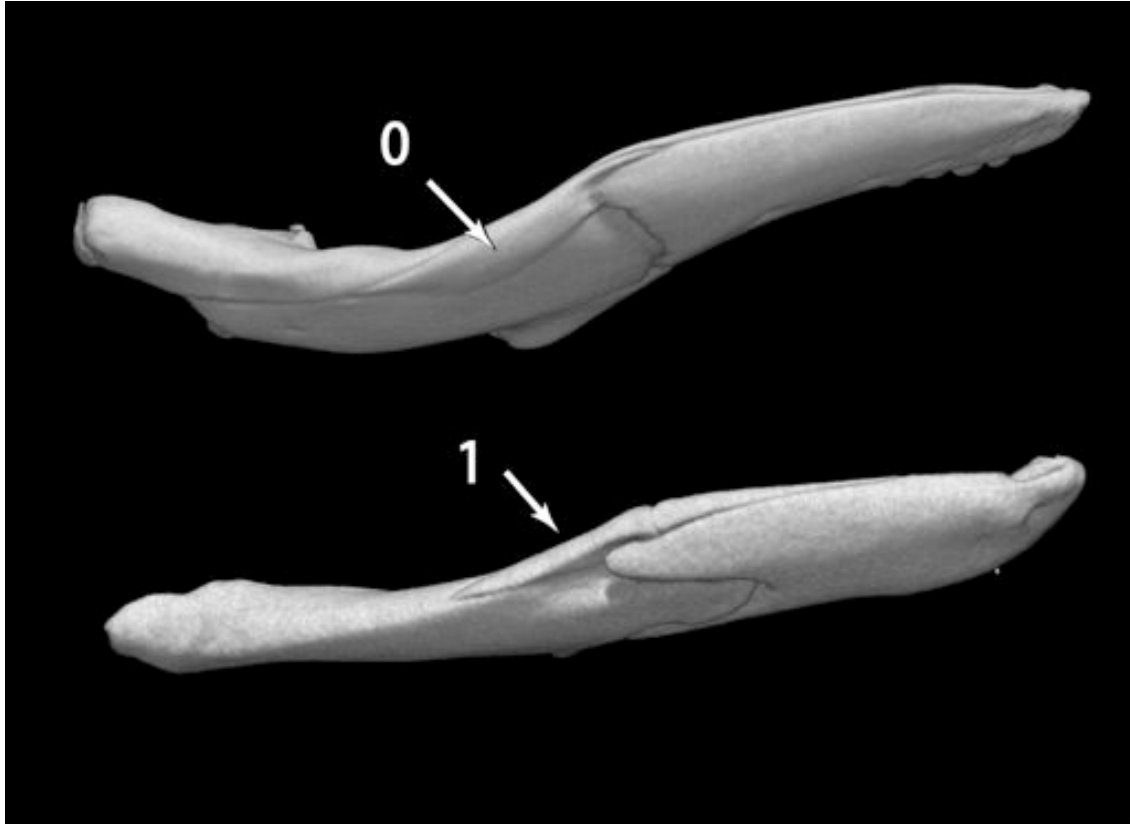

**Character 226, Angular on ventromedial aspect of mandible.** Ventrolaterally positioned angular (0) shown in *Varanus exanthematicus* (Varanidae), ventromedially positioned angular (1) shown in *Cylindrophis ruffus* (Uropeltidae)

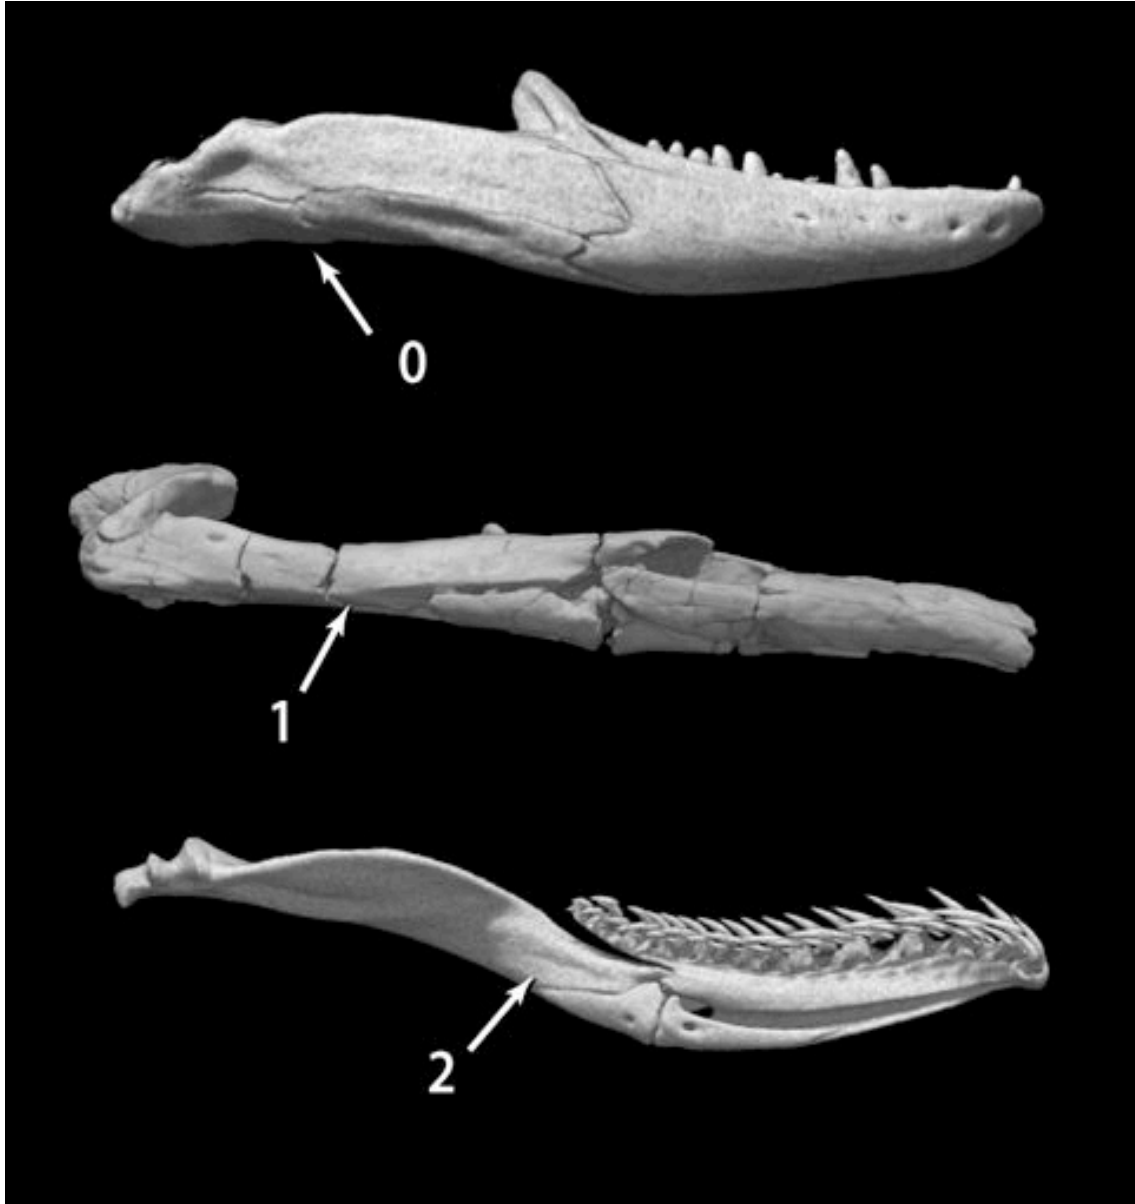

**Character 227, shortened angular.** Elongate angular (0) shown in *Varanus exanthematicus* (Varanidae), shortened angular (note long facet; posterior tip is broken) (1) shown in *Dinilysia patagonica*; highly reduced angular (2) shown in *Tropidophis haetianus* (Tropidophiidae).

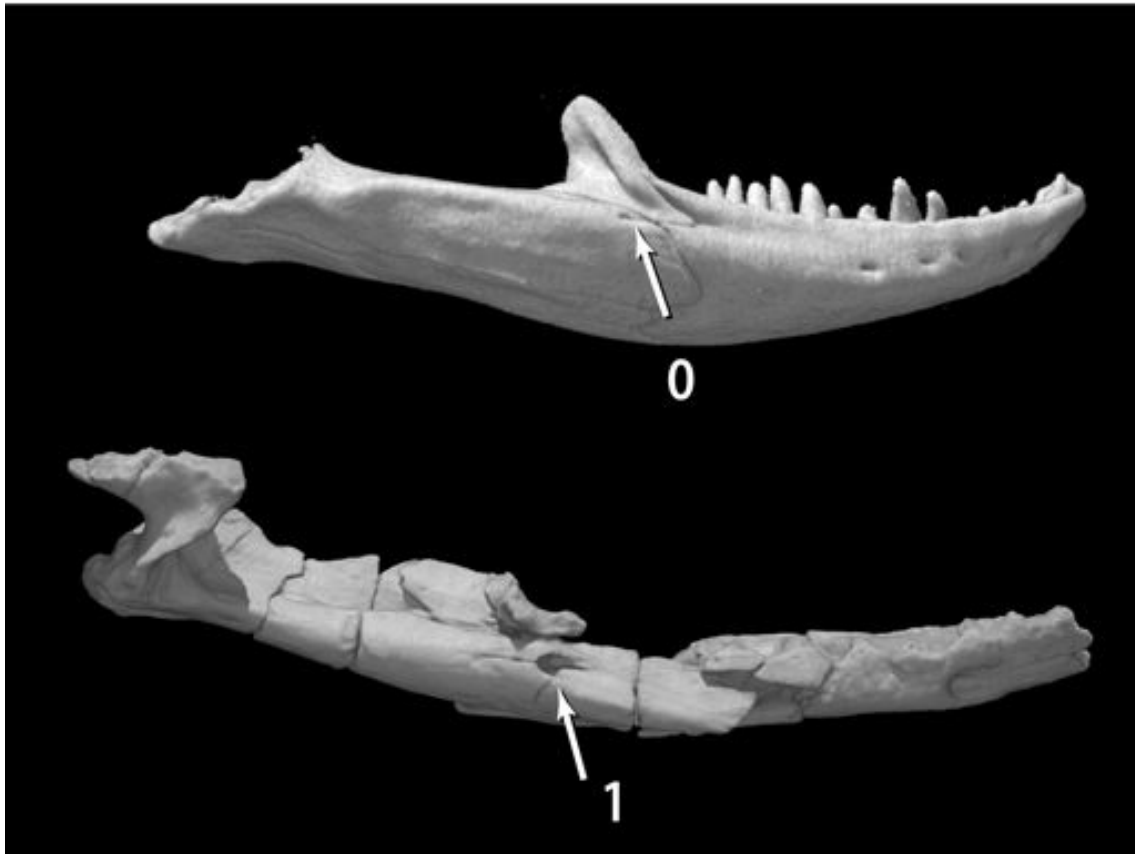

**Character 228, enlarged surangular foramen.** Small surangular foramen (0) shown in *Shinisaurus crocodilurus* (Xenosauridae), enlarged surangular foramen (1) shown in *Dinilysia patagonica*.

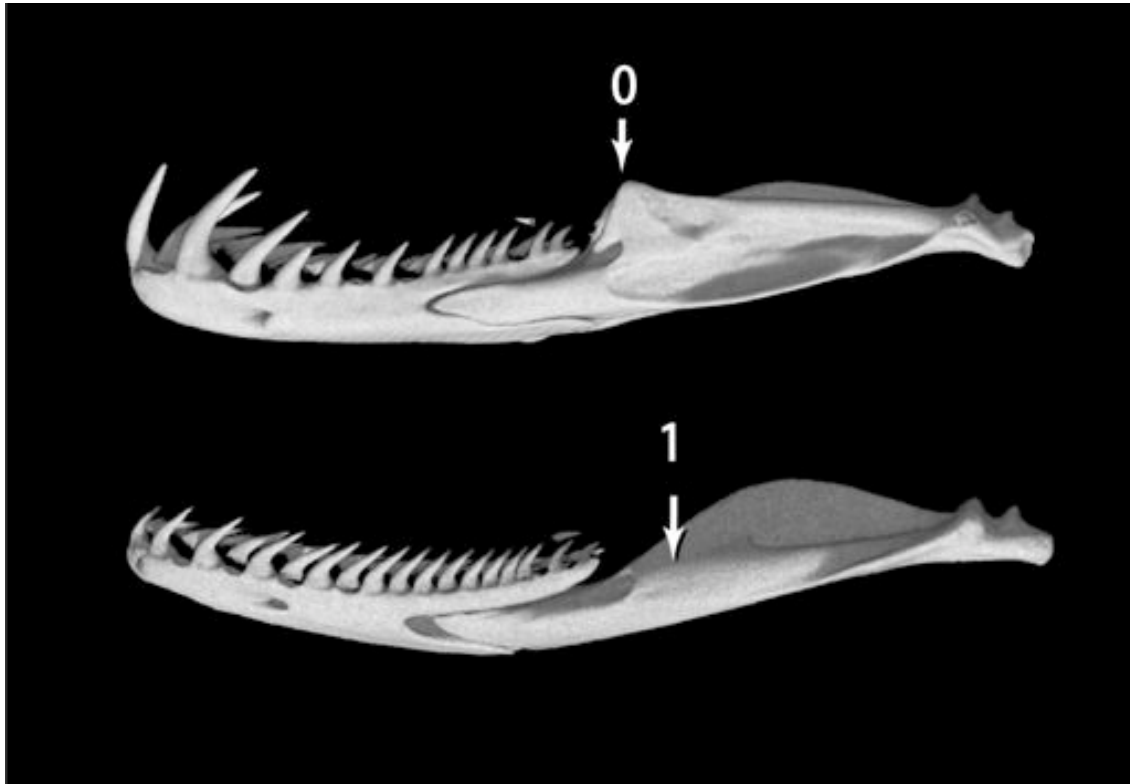

**Character 229, loss of coronoid eminence.** Coronoid eminence formed of coronoid and dorsal wing of surangular (0) shown in *Epicrates striatus* (Boidae), loss of coronoid eminence of coronoid/surangular (1) shown in *Tropidophis haetianus* (Tropidophiidae).

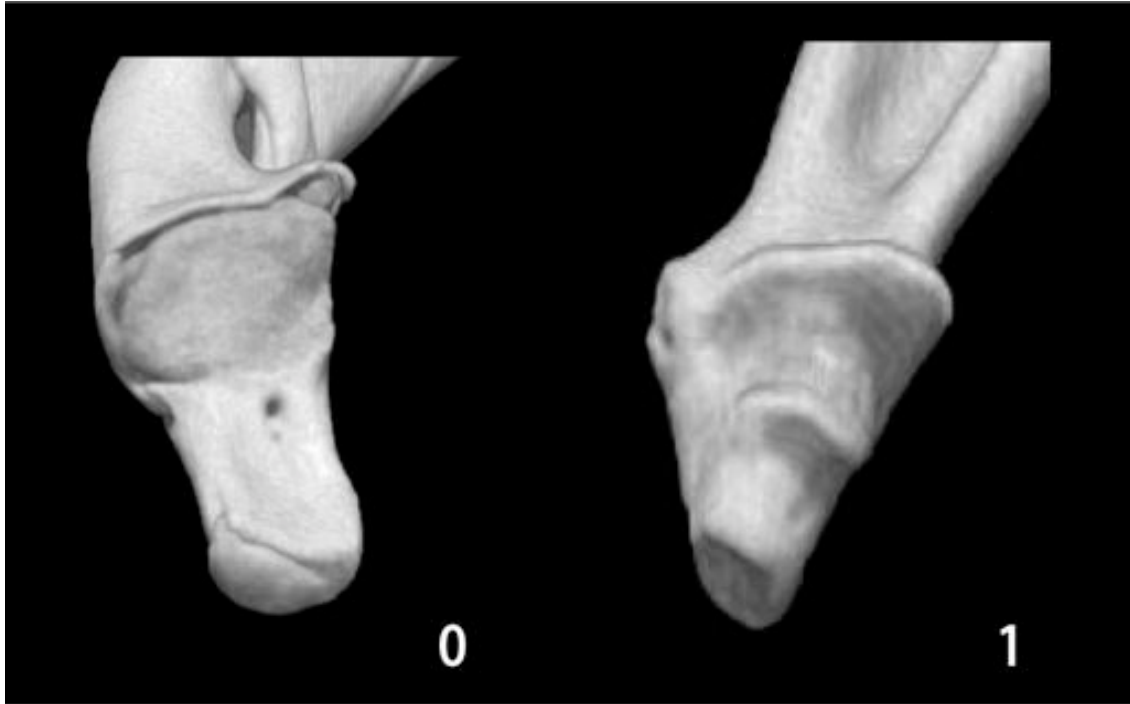

**Character 230, quadrate cotyle shape.** Primitive state (0) shown in *Varanus exanthematicus* (Varanidae), saddle shaped cotyle (1) shown in *Epicrates striatus* (Boinae).

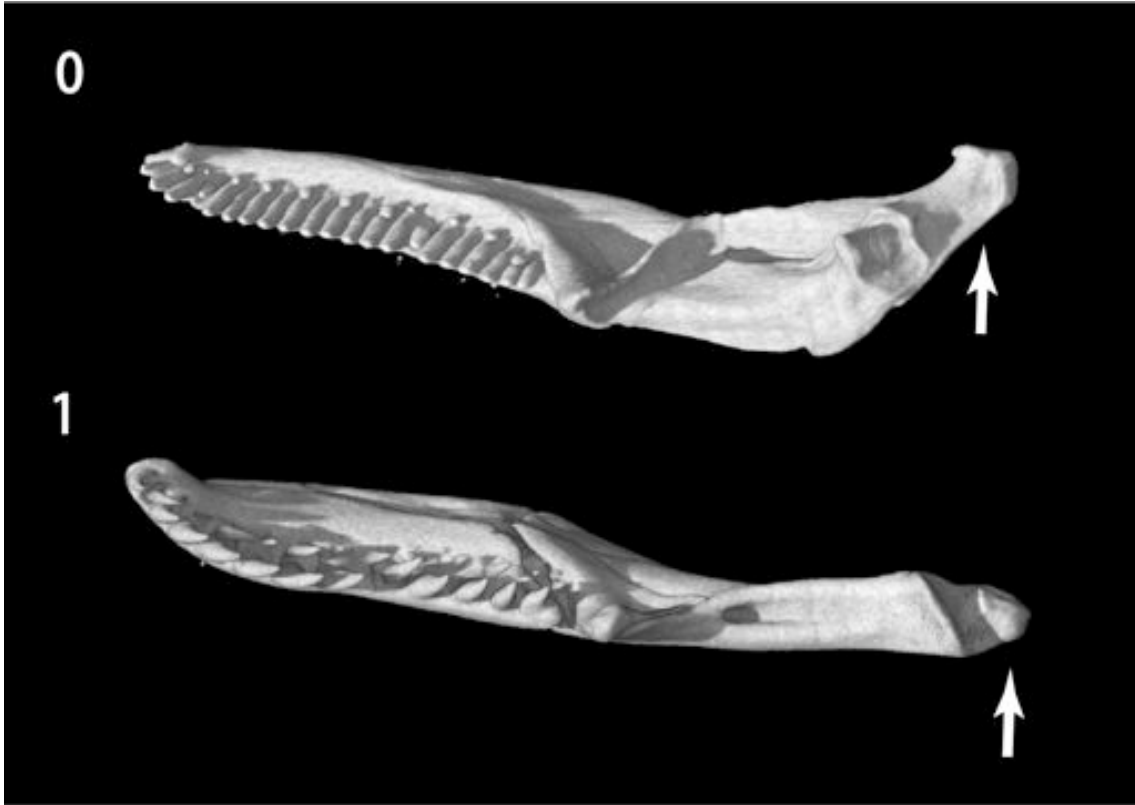

**Character 231, reduced retroarticular process.** Long retroarticular process (0) shown in *Xenosaurus grandis* (Xenosauridae), short retroarticular process (1) shown in *Cylindrophis ruffus* (Uropeltidae).



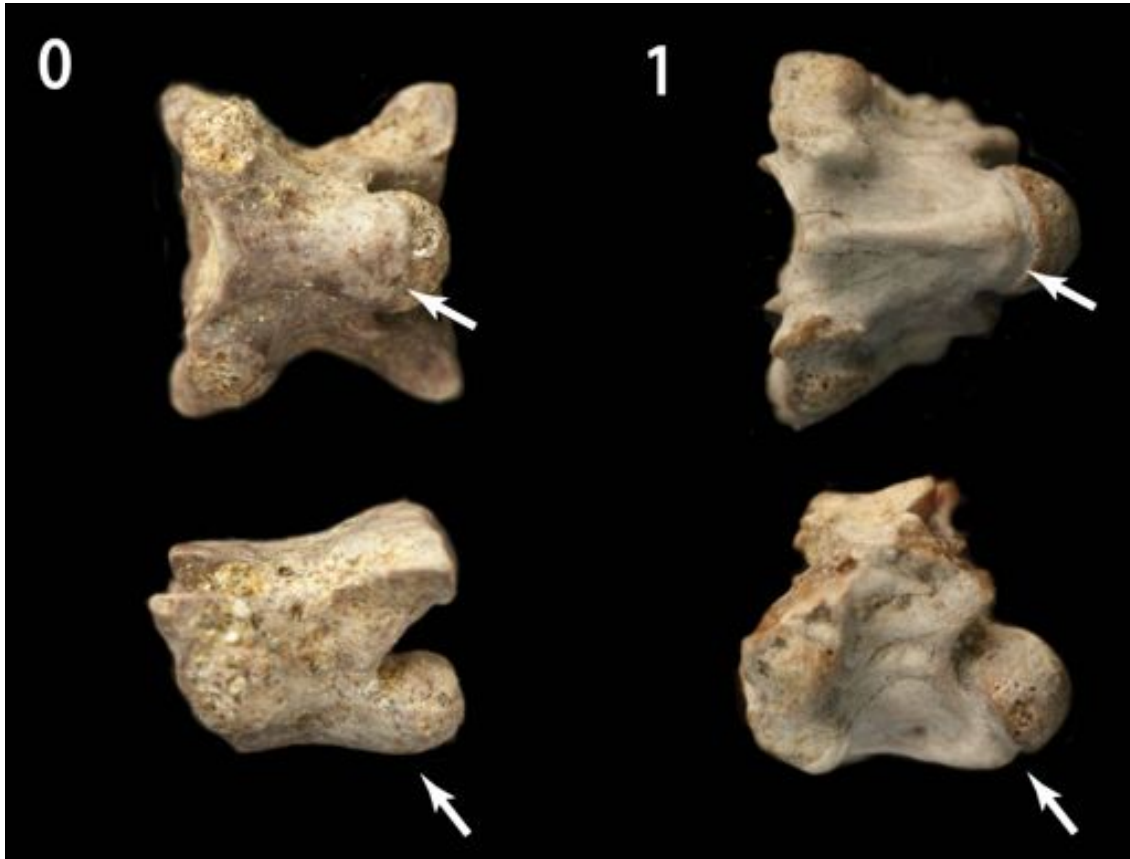

**Character 237, separation of condyle from centrum.** Condyle confluent with centrum (0) shown in *Coniophis precedens*, distinct separation of condyle from centrum by a groove (1) shown in unnamed Lance snake.
